# Supplementary material
Source: publisher site journal article supplement (https://www.spandidos-publications.com/5685/downloadSupplementary)
Supplement: Supplementary file 1 [file downloadSupplementary]

## Sheet: relation
Table SV. The co-expression among MBNL1-AS1, miRs and BVES in CRC tissues.
MicroRNA	style	Genesymbol	style_1	Gene1	biotype	style	Gene2	biotype_1	style_1	interaction	Type	Abs_Value	MicroRNA	style	lncRNA	style
hsa-miR-30d-5p	down	ADAMTS6	up	ADAMTS6	protein_coding	up	CASC15	lincRNA	up	0.866542	1	0.866542	hsa-miR-30d-5p	down	CASC15	up
hsa-miR-132-3p	down	ADAMTS6	up	ADAMTS6	protein_coding	up	CASC15	lincRNA	up	0.866542	1	0.866542	hsa-miR-132-3p	down	CASC15	up
hsa-miR-15a-5p	up	ADAMTSL3	down	ADAMTSL3	protein_coding	down	FENDRR	lincRNA	down	0.858624	1	0.858624	hsa-miR-15a-5p	up	FENDRR	down
hsa-miR-15a-5p	up	ADAMTSL3	down	ADAMTSL3	protein_coding	down	HAND2-AS1	lincRNA	down	0.909695	1	0.909695	hsa-miR-15a-5p	up	HAND2-AS1	down
hsa-miR-15a-5p	up	ADAMTSL3	down	ADAMTSL3	protein_coding	down	MBNL1-AS1	lincRNA	down	0.877286	1	0.877286	hsa-miR-15a-5p	up	MBNL1-AS1	down
hsa-miR-15a-5p	up	ADAMTSL3	down	ADAMTSL3	protein_coding	down	MIR497HG	lincRNA	down	0.858418	1	0.858418	hsa-miR-15a-5p	up	MIR497HG	down
hsa-miR-15a-5p	up	ADAMTSL3	down	ADAMTSL3	protein_coding	down	AC009102.2	lincRNA	down	0.908993	1	0.908993	hsa-miR-15a-5p	up	AC009102.2	down
hsa-miR-16-5p	up	ADAMTSL3	down	ADAMTSL3	protein_coding	down	FENDRR	lincRNA	down	0.858624	1	0.858624	hsa-miR-16-5p	up	FENDRR	down
hsa-miR-16-5p	up	ADAMTSL3	down	ADAMTSL3	protein_coding	down	HAND2-AS1	lincRNA	down	0.909695	1	0.909695	hsa-miR-16-5p	up	HAND2-AS1	down
hsa-miR-16-5p	up	ADAMTSL3	down	ADAMTSL3	protein_coding	down	MBNL1-AS1	lincRNA	down	0.877286	1	0.877286	hsa-miR-16-5p	up	MBNL1-AS1	down
hsa-miR-16-5p	up	ADAMTSL3	down	ADAMTSL3	protein_coding	down	MIR497HG	lincRNA	down	0.858418	1	0.858418	hsa-miR-16-5p	up	MIR497HG	down
hsa-miR-16-5p	up	ADAMTSL3	down	ADAMTSL3	protein_coding	down	AC009102.2	lincRNA	down	0.908993	1	0.908993	hsa-miR-16-5p	up	AC009102.2	down
hsa-miR-101-3p	up	ADAMTSL3	down	ADAMTSL3	protein_coding	down	AL356489.2	lincRNA	down	0.867808	1	0.867808	hsa-miR-101-3p	up	AL356489.2	down
hsa-miR-101-3p	up	ADAMTSL3	down	ADAMTSL3	protein_coding	down	FENDRR	lincRNA	down	0.858624	1	0.858624	hsa-miR-101-3p	up	FENDRR	down
hsa-miR-101-3p	up	ADAMTSL3	down	ADAMTSL3	protein_coding	down	HAND2-AS1	lincRNA	down	0.909695	1	0.909695	hsa-miR-101-3p	up	HAND2-AS1	down
hsa-miR-101-3p	up	ADAMTSL3	down	ADAMTSL3	protein_coding	down	MBNL1-AS1	lincRNA	down	0.877286	1	0.877286	hsa-miR-101-3p	up	MBNL1-AS1	down
hsa-miR-374b-5p	up	ADAMTSL3	down	ADAMTSL3	protein_coding	down	AF001548.1	lincRNA	down	0.857489	1	0.857489	hsa-miR-374b-5p	up	AF001548.1	down
hsa-miR-374b-5p	up	ADAMTSL3	down	ADAMTSL3	protein_coding	down	AL356489.2	lincRNA	down	0.867808	1	0.867808	hsa-miR-374b-5p	up	AL356489.2	down
hsa-miR-374b-5p	up	ADAMTSL3	down	ADAMTSL3	protein_coding	down	HAND2-AS1	lincRNA	down	0.909695	1	0.909695	hsa-miR-374b-5p	up	HAND2-AS1	down
hsa-miR-374b-5p	up	ADAMTSL3	down	ADAMTSL3	protein_coding	down	MBNL1-AS1	lincRNA	down	0.877286	1	0.877286	hsa-miR-374b-5p	up	MBNL1-AS1	down
hsa-miR-27a-3p	up	ADAMTSL3	down	ADAMTSL3	protein_coding	down	FENDRR	lincRNA	down	0.858624	1	0.858624	hsa-miR-27a-3p	up	FENDRR	down
hsa-miR-27a-3p	up	ADAMTSL3	down	ADAMTSL3	protein_coding	down	HAND2-AS1	lincRNA	down	0.909695	1	0.909695	hsa-miR-27a-3p	up	HAND2-AS1	down
hsa-miR-27a-3p	up	ADAMTSL3	down	ADAMTSL3	protein_coding	down	MBNL1-AS1	lincRNA	down	0.877286	1	0.877286	hsa-miR-27a-3p	up	MBNL1-AS1	down
hsa-miR-27a-3p	up	ADAMTSL3	down	ADAMTSL3	protein_coding	down	MIR497HG	lincRNA	down	0.858418	1	0.858418	hsa-miR-27a-3p	up	MIR497HG	down
hsa-miR-199a-3p	up	ADAMTSL3	down	ADAMTSL3	protein_coding	down	AL356489.2	lincRNA	down	0.867808	1	0.867808	hsa-miR-199a-3p	up	AL356489.2	down
hsa-miR-199a-3p	up	ADAMTSL3	down	ADAMTSL3	protein_coding	down	FENDRR	lincRNA	down	0.858624	1	0.858624	hsa-miR-199a-3p	up	FENDRR	down
hsa-miR-199a-3p	up	ADAMTSL3	down	ADAMTSL3	protein_coding	down	HAND2-AS1	lincRNA	down	0.909695	1	0.909695	hsa-miR-199a-3p	up	HAND2-AS1	down
hsa-miR-199b-3p	up	ADAMTSL3	down	ADAMTSL3	protein_coding	down	AL356489.2	lincRNA	down	0.867808	1	0.867808	hsa-miR-199b-3p	up	AL356489.2	down
hsa-miR-199b-3p	up	ADAMTSL3	down	ADAMTSL3	protein_coding	down	FENDRR	lincRNA	down	0.858624	1	0.858624	hsa-miR-199b-3p	up	FENDRR	down
hsa-miR-199b-3p	up	ADAMTSL3	down	ADAMTSL3	protein_coding	down	HAND2-AS1	lincRNA	down	0.909695	1	0.909695	hsa-miR-199b-3p	up	HAND2-AS1	down
hsa-miR-15a-5p	up	AHCYL2	down	AHCYL2	protein_coding	down	AC087379.1	lincRNA	down	0.850984	1	0.850984	hsa-miR-15a-5p	up	AC087379.1	down
hsa-miR-16-5p	up	AHCYL2	down	AHCYL2	protein_coding	down	AC087379.1	lincRNA	down	0.850984	1	0.850984	hsa-miR-16-5p	up	AC087379.1	down
hsa-let-7f-5p	up	AKAP6	down	AKAP6	protein_coding	down	MBNL1-AS1	lincRNA	down	0.87874	1	0.87874	hsa-let-7f-5p	up	MBNL1-AS1	down
hsa-let-7f-5p	up	AKAP6	down	AKAP6	protein_coding	down	AC036108.3	lincRNA	down	0.905614	1	0.905614	hsa-let-7f-5p	up	AC036108.3	down
hsa-miR-98-5p	up	AKAP6	down	AKAP6	protein_coding	down	MBNL1-AS1	lincRNA	down	0.87874	1	0.87874	hsa-miR-98-5p	up	MBNL1-AS1	down
hsa-miR-98-5p	up	AKAP6	down	AKAP6	protein_coding	down	AC036108.3	lincRNA	down	0.905614	1	0.905614	hsa-miR-98-5p	up	AC036108.3	down
hsa-miR-34a-5p	up	AKAP6	down	AKAP6	protein_coding	down	MBNL1-AS1	lincRNA	down	0.87874	1	0.87874	hsa-miR-34a-5p	up	MBNL1-AS1	down
hsa-let-7g-5p	up	AKAP6	down	AKAP6	protein_coding	down	MBNL1-AS1	lincRNA	down	0.87874	1	0.87874	hsa-let-7g-5p	up	MBNL1-AS1	down
hsa-miR-374b-5p	up	AKAP6	down	AKAP6	protein_coding	down	MBNL1-AS1	lincRNA	down	0.87874	1	0.87874	hsa-miR-374b-5p	up	MBNL1-AS1	down
hsa-miR-15a-5p	up	AMOTL1	down	AMOTL1	protein_coding	down	ZNF667-AS1	lincRNA	down	0.872551	1	0.872551	hsa-miR-15a-5p	up	ZNF667-AS1	down
hsa-miR-16-5p	up	AMOTL1	down	AMOTL1	protein_coding	down	ZNF667-AS1	lincRNA	down	0.872551	1	0.872551	hsa-miR-16-5p	up	ZNF667-AS1	down
hsa-miR-30b-5p	up	AMOTL1	down	AMOTL1	protein_coding	down	ZNF667-AS1	lincRNA	down	0.872551	1	0.872551	hsa-miR-30b-5p	up	ZNF667-AS1	down
hsa-miR-9-5p	up	AMOTL1	down	AMOTL1	protein_coding	down	ZNF667-AS1	lincRNA	down	0.872551	1	0.872551	hsa-miR-9-5p	up	ZNF667-AS1	down
hsa-miR-27a-3p	up	AMOTL1	down	AMOTL1	protein_coding	down	ZNF667-AS1	lincRNA	down	0.872551	1	0.872551	hsa-miR-27a-3p	up	ZNF667-AS1	down
hsa-miR-142-3p	up	AMOTL1	down	AMOTL1	protein_coding	down	ZNF667-AS1	lincRNA	down	0.872551	1	0.872551	hsa-miR-142-3p	up	ZNF667-AS1	down
hsa-miR-143-3p	up	AMOTL1	down	AMOTL1	protein_coding	down	ZNF667-AS1	lincRNA	down	0.872551	1	0.872551	hsa-miR-143-3p	up	ZNF667-AS1	down
hsa-miR-182-5p	up	ANGPTL1	down	ANGPTL1	protein_coding	down	AL356489.2	lincRNA	down	0.855578	1	0.855578	hsa-miR-182-5p	up	AL356489.2	down
hsa-miR-194-5p	up	ANGPTL1	down	ANGPTL1	protein_coding	down	AC036108.3	lincRNA	down	0.899741	1	0.899741	hsa-miR-194-5p	up	AC036108.3	down
hsa-miR-34a-5p	up	ANK2	down	ANK2	protein_coding	down	HAND2-AS1	lincRNA	down	0.857525	1	0.857525	hsa-miR-34a-5p	up	HAND2-AS1	down
hsa-miR-34a-5p	up	ANK2	down	ANK2	protein_coding	down	MBNL1-AS1	lincRNA	down	0.860202	1	0.860202	hsa-miR-34a-5p	up	MBNL1-AS1	down
hsa-miR-9-5p	up	ANK2	down	ANK2	protein_coding	down	HAND2-AS1	lincRNA	down	0.857525	1	0.857525	hsa-miR-9-5p	up	HAND2-AS1	down
hsa-miR-9-5p	up	ANK2	down	ANK2	protein_coding	down	MBNL1-AS1	lincRNA	down	0.860202	1	0.860202	hsa-miR-9-5p	up	MBNL1-AS1	down
hsa-miR-9-5p	up	ANK2	down	ANK2	protein_coding	down	AC009102.2	lincRNA	down	0.873918	1	0.873918	hsa-miR-9-5p	up	AC009102.2	down
hsa-miR-452-5p	up	ANK2	down	ANK2	protein_coding	down	HAND2-AS1	lincRNA	down	0.857525	1	0.857525	hsa-miR-452-5p	up	HAND2-AS1	down
hsa-miR-452-5p	up	ANK2	down	ANK2	protein_coding	down	MBNL1-AS1	lincRNA	down	0.860202	1	0.860202	hsa-miR-452-5p	up	MBNL1-AS1	down
hsa-let-7g-3p	up	ANK2	down	ANK2	protein_coding	down	HAND2-AS1	lincRNA	down	0.857525	1	0.857525	hsa-let-7g-3p	up	HAND2-AS1	down
hsa-let-7g-3p	up	ANK2	down	ANK2	protein_coding	down	AC009102.2	lincRNA	down	0.873918	1	0.873918	hsa-let-7g-3p	up	AC009102.2	down
hsa-miR-26a-5p	up	ANKS1B	down	ANKS1B	protein_coding	down	MBNL1-AS1	lincRNA	down	0.860005	1	0.860005	hsa-miR-26a-5p	up	MBNL1-AS1	down
hsa-miR-26b-5p	up	ANKS1B	down	ANKS1B	protein_coding	down	MBNL1-AS1	lincRNA	down	0.860005	1	0.860005	hsa-miR-26b-5p	up	MBNL1-AS1	down
hsa-miR-452-5p	up	ANKS1B	down	ANKS1B	protein_coding	down	MBNL1-AS1	lincRNA	down	0.860005	1	0.860005	hsa-miR-452-5p	up	MBNL1-AS1	down
hsa-miR-452-5p	up	ANKS1B	down	ANKS1B	protein_coding	down	AC036108.3	lincRNA	down	0.893533	1	0.893533	hsa-miR-452-5p	up	AC036108.3	down
hsa-miR-21-5p	up	ARMCX1	down	ARMCX1	protein_coding	down	ZNF667-AS1	lincRNA	down	0.861165	1	0.861165	hsa-miR-21-5p	up	ZNF667-AS1	down
hsa-miR-223-3p	up	ARMCX1	down	ARMCX1	protein_coding	down	ZNF667-AS1	lincRNA	down	0.861165	1	0.861165	hsa-miR-223-3p	up	ZNF667-AS1	down
hsa-miR-26a-5p	up	ARPP21	down	ARPP21	protein_coding	down	LY86-AS1	lincRNA	down	0.870441	1	0.870441	hsa-miR-26a-5p	up	LY86-AS1	down
hsa-miR-26a-5p	up	ARPP21	down	ARPP21	protein_coding	down	MIR137HG	lincRNA	down	0.88541	1	0.88541	hsa-miR-26a-5p	up	MIR137HG	down
hsa-miR-26a-5p	up	ARPP21	down	ARPP21	protein_coding	down	PTCHD1-AS	lincRNA	down	0.87875	1	0.87875	hsa-miR-26a-5p	up	PTCHD1-AS	down
hsa-miR-26b-5p	up	ARPP21	down	ARPP21	protein_coding	down	LINC02599	lincRNA	down	0.870835	1	0.870835	hsa-miR-26b-5p	up	LINC02599	down
hsa-miR-26b-5p	up	ARPP21	down	ARPP21	protein_coding	down	LY86-AS1	lincRNA	down	0.870441	1	0.870441	hsa-miR-26b-5p	up	LY86-AS1	down
hsa-miR-26b-5p	up	ARPP21	down	ARPP21	protein_coding	down	MIR137HG	lincRNA	down	0.88541	1	0.88541	hsa-miR-26b-5p	up	MIR137HG	down
hsa-miR-26b-5p	up	ARPP21	down	ARPP21	protein_coding	down	PTCHD1-AS	lincRNA	down	0.87875	1	0.87875	hsa-miR-26b-5p	up	PTCHD1-AS	down
hsa-miR-429	up	ARPP21	down	ARPP21	protein_coding	down	LY86-AS1	lincRNA	down	0.870441	1	0.870441	hsa-miR-429	up	LY86-AS1	down
hsa-let-7b-3p	down	ATAD5	up	ATAD5	protein_coding	up	LINC01572	lincRNA	up	0.864146	1	0.864146	hsa-let-7b-3p	down	LINC01572	up
hsa-let-7b-3p	down	ATAD5	up	ATAD5	protein_coding	up	AF117829.1	lincRNA	up	0.867816	1	0.867816	hsa-let-7b-3p	down	AF117829.1	up
hsa-let-7b-3p	down	ATAD5	up	ATAD5	protein_coding	up	AC093591.2	lincRNA	up	0.857328	1	0.857328	hsa-let-7b-3p	down	AC093591.2	up
hsa-miR-10a-5p	up	ATCAY	down	ATCAY	protein_coding	down	MIR7-3HG	lincRNA	down	0.864283	1	0.864283	hsa-miR-10a-5p	up	MIR7-3HG	down
hsa-miR-10b-5p	up	ATCAY	down	ATCAY	protein_coding	down	MIR7-3HG	lincRNA	down	0.864283	1	0.864283	hsa-miR-10b-5p	up	MIR7-3HG	down
hsa-miR-17-5p	up	ATP1A2	down	ATP1A2	protein_coding	down	MBNL1-AS1	lincRNA	down	0.851262	1	0.851262	hsa-miR-17-5p	up	MBNL1-AS1	down
hsa-miR-20a-5p	up	ATP1A2	down	ATP1A2	protein_coding	down	MBNL1-AS1	lincRNA	down	0.851262	1	0.851262	hsa-miR-20a-5p	up	MBNL1-AS1	down
hsa-miR-26a-5p	up	ATP1A2	down	ATP1A2	protein_coding	down	MBNL1-AS1	lincRNA	down	0.851262	1	0.851262	hsa-miR-26a-5p	up	MBNL1-AS1	down
hsa-miR-26a-5p	up	ATP1A2	down	ATP1A2	protein_coding	down	AL513217.1	lincRNA	down	0.861241	1	0.861241	hsa-miR-26a-5p	up	AL513217.1	down
hsa-miR-26b-5p	up	ATP1A2	down	ATP1A2	protein_coding	down	MBNL1-AS1	lincRNA	down	0.851262	1	0.851262	hsa-miR-26b-5p	up	MBNL1-AS1	down
hsa-miR-26b-5p	up	ATP1A2	down	ATP1A2	protein_coding	down	AL513217.1	lincRNA	down	0.861241	1	0.861241	hsa-miR-26b-5p	up	AL513217.1	down
hsa-miR-106a-5p	up	ATP1A2	down	ATP1A2	protein_coding	down	MBNL1-AS1	lincRNA	down	0.851262	1	0.851262	hsa-miR-106a-5p	up	MBNL1-AS1	down
hsa-miR-126-5p	up	ATP1A2	down	ATP1A2	protein_coding	down	MBNL1-AS1	lincRNA	down	0.851262	1	0.851262	hsa-miR-126-5p	up	MBNL1-AS1	down
hsa-miR-106b-5p	up	ATP1A2	down	ATP1A2	protein_coding	down	MBNL1-AS1	lincRNA	down	0.851262	1	0.851262	hsa-miR-106b-5p	up	MBNL1-AS1	down
hsa-let-7f-5p	up	ATP2B4	down	ATP2B4	protein_coding	down	MBNL1-AS1	lincRNA	down	0.920604	1	0.920604	hsa-let-7f-5p	up	MBNL1-AS1	down
hsa-let-7f-5p	up	ATP2B4	down	ATP2B4	protein_coding	down	AC036108.3	lincRNA	down	0.893581	1	0.893581	hsa-let-7f-5p	up	AC036108.3	down
hsa-let-7f-5p	up	ATP2B4	down	ATP2B4	protein_coding	down	AL356489.2	lincRNA	down	0.874152	1	0.874152	hsa-let-7f-5p	up	AL356489.2	down
hsa-miR-98-5p	up	ATP2B4	down	ATP2B4	protein_coding	down	MBNL1-AS1	lincRNA	down	0.920604	1	0.920604	hsa-miR-98-5p	up	MBNL1-AS1	down
hsa-miR-98-5p	up	ATP2B4	down	ATP2B4	protein_coding	down	AC036108.3	lincRNA	down	0.893581	1	0.893581	hsa-miR-98-5p	up	AC036108.3	down
hsa-miR-98-5p	up	ATP2B4	down	ATP2B4	protein_coding	down	AL356489.2	lincRNA	down	0.874152	1	0.874152	hsa-miR-98-5p	up	AL356489.2	down
hsa-miR-183-5p	up	ATP2B4	down	ATP2B4	protein_coding	down	MBNL1-AS1	lincRNA	down	0.920604	1	0.920604	hsa-miR-183-5p	up	MBNL1-AS1	down
hsa-let-7g-5p	up	ATP2B4	down	ATP2B4	protein_coding	down	MBNL1-AS1	lincRNA	down	0.920604	1	0.920604	hsa-let-7g-5p	up	MBNL1-AS1	down
hsa-miR-27b-5p	up	ATP2B4	down	ATP2B4	protein_coding	down	MBNL1-AS1	lincRNA	down	0.920604	1	0.920604	hsa-miR-27b-5p	up	MBNL1-AS1	down
hsa-miR-27b-5p	up	ATP2B4	down	ATP2B4	protein_coding	down	AC036108.3	lincRNA	down	0.893581	1	0.893581	hsa-miR-27b-5p	up	AC036108.3	down
hsa-miR-27b-5p	up	ATP2B4	down	ATP2B4	protein_coding	down	AL513217.1	lincRNA	down	0.862642	1	0.862642	hsa-miR-27b-5p	up	AL513217.1	down
hsa-miR-29b-3p	up	ATP2B4	down	ATP2B4	protein_coding	down	MBNL1-AS1	lincRNA	down	0.920604	1	0.920604	hsa-miR-29b-3p	up	MBNL1-AS1	down
hsa-miR-148a-3p	up	ATP2B4	down	ATP2B4	protein_coding	down	MBNL1-AS1	lincRNA	down	0.920604	1	0.920604	hsa-miR-148a-3p	up	MBNL1-AS1	down
hsa-miR-148a-3p	up	ATP2B4	down	ATP2B4	protein_coding	down	AC036108.3	lincRNA	down	0.893581	1	0.893581	hsa-miR-148a-3p	up	AC036108.3	down
hsa-miR-148a-3p	up	ATP2B4	down	ATP2B4	protein_coding	down	AC009102.2	lincRNA	down	0.893241	1	0.893241	hsa-miR-148a-3p	up	AC009102.2	down
hsa-miR-152-3p	up	ATP2B4	down	ATP2B4	protein_coding	down	MBNL1-AS1	lincRNA	down	0.920604	1	0.920604	hsa-miR-152-3p	up	MBNL1-AS1	down
hsa-miR-152-3p	up	ATP2B4	down	ATP2B4	protein_coding	down	AC009102.2	lincRNA	down	0.893241	1	0.893241	hsa-miR-152-3p	up	AC009102.2	down
hsa-miR-29c-3p	up	ATP2B4	down	ATP2B4	protein_coding	down	MBNL1-AS1	lincRNA	down	0.920604	1	0.920604	hsa-miR-29c-3p	up	MBNL1-AS1	down
hsa-miR-148a-3p	up	BMP3	down	BMP3	protein_coding	down	AC087379.1	lincRNA	down	0.867601	1	0.867601	hsa-miR-148a-3p	up	AC087379.1	down
hsa-miR-132-3p	down	BOLL	up	BOLL	protein_coding	up	FTX	lincRNA	up	0.861968	1	0.861968	hsa-miR-132-3p	down	FTX	up
hsa-miR-132-3p	down	BOLL	up	BOLL	protein_coding	up	LINC01473	lincRNA	up	0.869238	1	0.869238	hsa-miR-132-3p	down	LINC01473	up
hsa-miR-132-3p	down	BOLL	up	BOLL	protein_coding	up	LINC01524	lincRNA	up	0.891537	1	0.891537	hsa-miR-132-3p	down	LINC01524	up
hsa-miR-132-3p	down	BOLL	up	BOLL	protein_coding	up	AC007336.1	lincRNA	up	0.875588	1	0.875588	hsa-miR-132-3p	down	AC007336.1	up
hsa-miR-132-3p	down	BOLL	up	BOLL	protein_coding	up	AC022893.3	lincRNA	up	0.881733	1	0.881733	hsa-miR-132-3p	down	AC022893.3	up
hsa-miR-132-3p	down	BOLL	up	BOLL	protein_coding	up	AC109466.1	lincRNA	up	0.858595	1	0.858595	hsa-miR-132-3p	down	AC109466.1	up
hsa-miR-24-3p	up	BVES	down	BVES	protein_coding	down	AC036108.3	lincRNA	down	0.905436	1	0.905436	hsa-miR-24-3p	up	AC036108.3	down
hsa-miR-24-3p	up	BVES	down	BVES	protein_coding	down	AL513217.1	lincRNA	down	0.882825	1	0.882825	hsa-miR-24-3p	up	AL513217.1	down
hsa-miR-24-3p	up	BVES	down	BVES	protein_coding	down	AC009102.2	lincRNA	down	0.857734	1	0.857734	hsa-miR-24-3p	up	AC009102.2	down
hsa-miR-24-3p	up	BVES	down	BVES	protein_coding	down	AL356489.2	lincRNA	down	0.87946	1	0.87946	hsa-miR-24-3p	up	AL356489.2	down
hsa-miR-29b-3p	up	BVES	down	BVES	protein_coding	down	MBNL1-AS1	lincRNA	down	0.945894	1	0.945894	hsa-miR-29b-3p	up	MBNL1-AS1	down
hsa-miR-29c-3p	up	BVES	down	BVES	protein_coding	down	MBNL1-AS1	lincRNA	down	0.945894	1	0.945894	hsa-miR-29c-3p	up	MBNL1-AS1	down
hsa-miR-17-5p	up	CALD1	down	CALD1	protein_coding	down	MBNL1-AS1	lincRNA	down	0.906259	1	0.906259	hsa-miR-17-5p	up	MBNL1-AS1	down
hsa-miR-20a-5p	up	CALD1	down	CALD1	protein_coding	down	MBNL1-AS1	lincRNA	down	0.906259	1	0.906259	hsa-miR-20a-5p	up	MBNL1-AS1	down
hsa-miR-106a-5p	up	CALD1	down	CALD1	protein_coding	down	MBNL1-AS1	lincRNA	down	0.906259	1	0.906259	hsa-miR-106a-5p	up	MBNL1-AS1	down
hsa-miR-30b-5p	up	CALD1	down	CALD1	protein_coding	down	MBNL1-AS1	lincRNA	down	0.906259	1	0.906259	hsa-miR-30b-5p	up	MBNL1-AS1	down
hsa-miR-106b-5p	up	CALD1	down	CALD1	protein_coding	down	MBNL1-AS1	lincRNA	down	0.906259	1	0.906259	hsa-miR-106b-5p	up	MBNL1-AS1	down
hsa-miR-30e-5p	up	CALD1	down	CALD1	protein_coding	down	MBNL1-AS1	lincRNA	down	0.906259	1	0.906259	hsa-miR-30e-5p	up	MBNL1-AS1	down
hsa-miR-27a-3p	up	CALD1	down	CALD1	protein_coding	down	MBNL1-AS1	lincRNA	down	0.906259	1	0.906259	hsa-miR-27a-3p	up	MBNL1-AS1	down
hsa-miR-183-5p	up	CALN1	down	CALN1	protein_coding	down	LINC01532	lincRNA	down	0.875956	1	0.875956	hsa-miR-183-5p	up	LINC01532	down
hsa-miR-183-5p	up	CALN1	down	CALN1	protein_coding	down	LINC02554	lincRNA	down	0.863542	1	0.863542	hsa-miR-183-5p	up	LINC02554	down
hsa-miR-127-5p	up	CALN1	down	CALN1	protein_coding	down	LINC01532	lincRNA	down	0.875956	1	0.875956	hsa-miR-127-5p	up	LINC01532	down
hsa-miR-127-5p	up	CALN1	down	CALN1	protein_coding	down	LINC02554	lincRNA	down	0.863542	1	0.863542	hsa-miR-127-5p	up	LINC02554	down
hsa-miR-127-5p	up	CALN1	down	CALN1	protein_coding	down	MIR137HG	lincRNA	down	0.853218	1	0.853218	hsa-miR-127-5p	up	MIR137HG	down
hsa-miR-17-3p	up	CALN1	down	CALN1	protein_coding	down	LINC01532	lincRNA	down	0.875956	1	0.875956	hsa-miR-17-3p	up	LINC01532	down
hsa-miR-17-3p	up	CALN1	down	CALN1	protein_coding	down	LINC02554	lincRNA	down	0.863542	1	0.863542	hsa-miR-17-3p	up	LINC02554	down
hsa-miR-17-3p	up	CALN1	down	CALN1	protein_coding	down	MIR137HG	lincRNA	down	0.853218	1	0.853218	hsa-miR-17-3p	up	MIR137HG	down
hsa-miR-143-3p	up	CALN1	down	CALN1	protein_coding	down	LINC01532	lincRNA	down	0.875956	1	0.875956	hsa-miR-143-3p	up	LINC01532	down
hsa-miR-143-3p	up	CALN1	down	CALN1	protein_coding	down	LINC02554	lincRNA	down	0.863542	1	0.863542	hsa-miR-143-3p	up	LINC02554	down
hsa-miR-24-3p	up	CELA1	down	CELA1	protein_coding	down	GPRACR	lincRNA	down	0.874475	1	0.874475	hsa-miR-24-3p	up	GPRACR	down
hsa-miR-24-3p	up	CELA1	down	CELA1	protein_coding	down	LINC01907	lincRNA	down	0.890786	1	0.890786	hsa-miR-24-3p	up	LINC01907	down
hsa-miR-24-3p	up	CELA1	down	CELA1	protein_coding	down	LINC02554	lincRNA	down	0.917276	1	0.917276	hsa-miR-24-3p	up	LINC02554	down
hsa-miR-24-3p	up	CELA1	down	CELA1	protein_coding	down	AC026469.1	lincRNA	down	0.857148	1	0.857148	hsa-miR-24-3p	up	AC026469.1	down
hsa-miR-24-3p	up	CELA1	down	CELA1	protein_coding	down	AP003064.2	lincRNA	down	0.852516	1	0.852516	hsa-miR-24-3p	up	AP003064.2	down
hsa-miR-24-3p	up	CELA1	down	CELA1	protein_coding	down	AL772337.2	lincRNA	down	0.923911	1	0.923911	hsa-miR-24-3p	up	AL772337.2	down
hsa-miR-24-3p	up	CELA1	down	CELA1	protein_coding	down	AC026688.2	lincRNA	down	0.929497	1	0.929497	hsa-miR-24-3p	up	AC026688.2	down
hsa-miR-24-3p	up	CELA1	down	CELA1	protein_coding	down	AC007920.1	lincRNA	down	0.864395	1	0.864395	hsa-miR-24-3p	up	AC007920.1	down
hsa-miR-24-3p	up	CELA1	down	CELA1	protein_coding	down	AC139099.2	lincRNA	down	0.925832	1	0.925832	hsa-miR-24-3p	up	AC139099.2	down
hsa-miR-17-5p	up	CFL2	down	CFL2	protein_coding	down	HAND2-AS1	lincRNA	down	0.860421	1	0.860421	hsa-miR-17-5p	up	HAND2-AS1	down
hsa-miR-17-5p	up	CFL2	down	CFL2	protein_coding	down	MBNL1-AS1	lincRNA	down	0.91955	1	0.91955	hsa-miR-17-5p	up	MBNL1-AS1	down
hsa-miR-20a-5p	up	CFL2	down	CFL2	protein_coding	down	HAND2-AS1	lincRNA	down	0.860421	1	0.860421	hsa-miR-20a-5p	up	HAND2-AS1	down
hsa-miR-20a-5p	up	CFL2	down	CFL2	protein_coding	down	MBNL1-AS1	lincRNA	down	0.91955	1	0.91955	hsa-miR-20a-5p	up	MBNL1-AS1	down
hsa-miR-106a-5p	up	CFL2	down	CFL2	protein_coding	down	HAND2-AS1	lincRNA	down	0.860421	1	0.860421	hsa-miR-106a-5p	up	HAND2-AS1	down
hsa-miR-106a-5p	up	CFL2	down	CFL2	protein_coding	down	MBNL1-AS1	lincRNA	down	0.91955	1	0.91955	hsa-miR-106a-5p	up	MBNL1-AS1	down
hsa-miR-183-5p	up	CFL2	down	CFL2	protein_coding	down	HAND2-AS1	lincRNA	down	0.860421	1	0.860421	hsa-miR-183-5p	up	HAND2-AS1	down
hsa-miR-183-5p	up	CFL2	down	CFL2	protein_coding	down	MBNL1-AS1	lincRNA	down	0.91955	1	0.91955	hsa-miR-183-5p	up	MBNL1-AS1	down
hsa-miR-30b-5p	up	CFL2	down	CFL2	protein_coding	down	HAND2-AS1	lincRNA	down	0.860421	1	0.860421	hsa-miR-30b-5p	up	HAND2-AS1	down
hsa-miR-30b-5p	up	CFL2	down	CFL2	protein_coding	down	MBNL1-AS1	lincRNA	down	0.91955	1	0.91955	hsa-miR-30b-5p	up	MBNL1-AS1	down
hsa-miR-106b-5p	up	CFL2	down	CFL2	protein_coding	down	HAND2-AS1	lincRNA	down	0.860421	1	0.860421	hsa-miR-106b-5p	up	HAND2-AS1	down
hsa-miR-106b-5p	up	CFL2	down	CFL2	protein_coding	down	MBNL1-AS1	lincRNA	down	0.91955	1	0.91955	hsa-miR-106b-5p	up	MBNL1-AS1	down
hsa-miR-106b-5p	up	CFL2	down	CFL2	protein_coding	down	AC010776.2	lincRNA	down	0.867096	1	0.867096	hsa-miR-106b-5p	up	AC010776.2	down
hsa-miR-30e-5p	up	CFL2	down	CFL2	protein_coding	down	HAND2-AS1	lincRNA	down	0.860421	1	0.860421	hsa-miR-30e-5p	up	HAND2-AS1	down
hsa-miR-30e-5p	up	CFL2	down	CFL2	protein_coding	down	MBNL1-AS1	lincRNA	down	0.91955	1	0.91955	hsa-miR-30e-5p	up	MBNL1-AS1	down
hsa-miR-429	up	CFL2	down	CFL2	protein_coding	down	HAND2-AS1	lincRNA	down	0.860421	1	0.860421	hsa-miR-429	up	HAND2-AS1	down
hsa-miR-429	up	CFL2	down	CFL2	protein_coding	down	MBNL1-AS1	lincRNA	down	0.91955	1	0.91955	hsa-miR-429	up	MBNL1-AS1	down
hsa-miR-429	up	CFL2	down	CFL2	protein_coding	down	AL513217.1	lincRNA	down	0.856366	1	0.856366	hsa-miR-429	up	AL513217.1	down
hsa-miR-199a-3p	up	CFL2	down	CFL2	protein_coding	down	HAND2-AS1	lincRNA	down	0.860421	1	0.860421	hsa-miR-199a-3p	up	HAND2-AS1	down
hsa-miR-199b-3p	up	CFL2	down	CFL2	protein_coding	down	HAND2-AS1	lincRNA	down	0.860421	1	0.860421	hsa-miR-199b-3p	up	HAND2-AS1	down
hsa-miR-142-3p	up	CFL2	down	CFL2	protein_coding	down	HAND2-AS1	lincRNA	down	0.860421	1	0.860421	hsa-miR-142-3p	up	HAND2-AS1	down
hsa-miR-142-3p	up	CFL2	down	CFL2	protein_coding	down	MBNL1-AS1	lincRNA	down	0.91955	1	0.91955	hsa-miR-142-3p	up	MBNL1-AS1	down
hsa-miR-142-3p	up	CFL2	down	CFL2	protein_coding	down	MIR497HG	lincRNA	down	0.853965	1	0.853965	hsa-miR-142-3p	up	MIR497HG	down
hsa-miR-17-5p	up	CHRM2	down	CHRM2	protein_coding	down	MBNL1-AS1	lincRNA	down	0.922349	1	0.922349	hsa-miR-17-5p	up	MBNL1-AS1	down
hsa-miR-17-5p	up	CHRM2	down	CHRM2	protein_coding	down	AL356489.2	lincRNA	down	0.882816	1	0.882816	hsa-miR-17-5p	up	AL356489.2	down
hsa-miR-20a-5p	up	CHRM2	down	CHRM2	protein_coding	down	MBNL1-AS1	lincRNA	down	0.922349	1	0.922349	hsa-miR-20a-5p	up	MBNL1-AS1	down
hsa-miR-20a-5p	up	CHRM2	down	CHRM2	protein_coding	down	AL356489.2	lincRNA	down	0.882816	1	0.882816	hsa-miR-20a-5p	up	AL356489.2	down
hsa-miR-106a-5p	up	CHRM2	down	CHRM2	protein_coding	down	MBNL1-AS1	lincRNA	down	0.922349	1	0.922349	hsa-miR-106a-5p	up	MBNL1-AS1	down
hsa-miR-106a-5p	up	CHRM2	down	CHRM2	protein_coding	down	AL356489.2	lincRNA	down	0.882816	1	0.882816	hsa-miR-106a-5p	up	AL356489.2	down
hsa-miR-106b-5p	up	CHRM2	down	CHRM2	protein_coding	down	MBNL1-AS1	lincRNA	down	0.922349	1	0.922349	hsa-miR-106b-5p	up	MBNL1-AS1	down
hsa-miR-106b-5p	up	CHRM2	down	CHRM2	protein_coding	down	AL356489.2	lincRNA	down	0.882816	1	0.882816	hsa-miR-106b-5p	up	AL356489.2	down
hsa-miR-130a-3p	up	CHRM2	down	CHRM2	protein_coding	down	MBNL1-AS1	lincRNA	down	0.922349	1	0.922349	hsa-miR-130a-3p	up	MBNL1-AS1	down
hsa-miR-30d-5p	down	CLRN1	up	CLRN1	protein_coding	up	LINC01600	lincRNA	up	0.853223	1	0.853223	hsa-miR-30d-5p	down	LINC01600	up
hsa-miR-30d-5p	down	CLRN1	up	CLRN1	protein_coding	up	NAV2-AS5	lincRNA	up	0.88434	1	0.88434	hsa-miR-30d-5p	down	NAV2-AS5	up
hsa-miR-30d-5p	down	CLRN1	up	CLRN1	protein_coding	up	AC135012.1	lincRNA	up	0.856574	1	0.856574	hsa-miR-30d-5p	down	AC135012.1	up
hsa-miR-30a-3p	down	CLRN1	up	CLRN1	protein_coding	up	CLSTN2-AS1	lincRNA	up	0.852226	1	0.852226	hsa-miR-30a-3p	down	CLSTN2-AS1	up
hsa-miR-30a-3p	down	CLRN1	up	CLRN1	protein_coding	up	LINC00384	lincRNA	up	0.882415	1	0.882415	hsa-miR-30a-3p	down	LINC00384	up
hsa-miR-30a-3p	down	CLRN1	up	CLRN1	protein_coding	up	LINC01600	lincRNA	up	0.853223	1	0.853223	hsa-miR-30a-3p	down	LINC01600	up
hsa-miR-30a-3p	down	CLRN1	up	CLRN1	protein_coding	up	ZNF32-AS3	lincRNA	up	0.852465	1	0.852465	hsa-miR-30a-3p	down	ZNF32-AS3	up
hsa-miR-30a-3p	down	CLRN1	up	CLRN1	protein_coding	up	AC135012.1	lincRNA	up	0.856574	1	0.856574	hsa-miR-30a-3p	down	AC135012.1	up
hsa-miR-30a-3p	down	CLRN1	up	CLRN1	protein_coding	up	AC008938.1	lincRNA	up	0.917478	1	0.917478	hsa-miR-30a-3p	down	AC008938.1	up
hsa-miR-16-5p	up	CNN1	down	CNN1	protein_coding	down	AC079313.2	lincRNA	down	0.89347	1	0.89347	hsa-miR-16-5p	up	AC079313.2	down
hsa-let-7f-5p	up	CPEB1	down	CPEB1	protein_coding	down	MBNL1-AS1	lincRNA	down	0.885524	1	0.885524	hsa-let-7f-5p	up	MBNL1-AS1	down
hsa-let-7f-5p	up	CPEB1	down	CPEB1	protein_coding	down	AC036108.3	lincRNA	down	0.852157	1	0.852157	hsa-let-7f-5p	up	AC036108.3	down
hsa-let-7f-5p	up	CPEB1	down	CPEB1	protein_coding	down	AL356489.2	lincRNA	down	0.878023	1	0.878023	hsa-let-7f-5p	up	AL356489.2	down
hsa-miR-98-5p	up	CPEB1	down	CPEB1	protein_coding	down	MBNL1-AS1	lincRNA	down	0.885524	1	0.885524	hsa-miR-98-5p	up	MBNL1-AS1	down
hsa-miR-98-5p	up	CPEB1	down	CPEB1	protein_coding	down	AC036108.3	lincRNA	down	0.852157	1	0.852157	hsa-miR-98-5p	up	AC036108.3	down
hsa-miR-98-5p	up	CPEB1	down	CPEB1	protein_coding	down	AL356489.2	lincRNA	down	0.878023	1	0.878023	hsa-miR-98-5p	up	AL356489.2	down
hsa-miR-183-5p	up	CPEB1	down	CPEB1	protein_coding	down	MBNL1-AS1	lincRNA	down	0.885524	1	0.885524	hsa-miR-183-5p	up	MBNL1-AS1	down
hsa-miR-183-5p	up	CPEB1	down	CPEB1	protein_coding	down	MIR1-1HG-AS1	lincRNA	down	0.859132	1	0.859132	hsa-miR-183-5p	up	MIR1-1HG-AS1	down
hsa-let-7g-5p	up	CPEB1	down	CPEB1	protein_coding	down	MBNL1-AS1	lincRNA	down	0.885524	1	0.885524	hsa-let-7g-5p	up	MBNL1-AS1	down
hsa-miR-9-5p	up	CPEB1	down	CPEB1	protein_coding	down	MBNL1-AS1	lincRNA	down	0.885524	1	0.885524	hsa-miR-9-5p	up	MBNL1-AS1	down
hsa-miR-9-5p	up	CPEB1	down	CPEB1	protein_coding	down	MIR1-1HG-AS1	lincRNA	down	0.859132	1	0.859132	hsa-miR-9-5p	up	MIR1-1HG-AS1	down
hsa-miR-9-5p	up	CPEB1	down	CPEB1	protein_coding	down	MIR497HG	lincRNA	down	0.863831	1	0.863831	hsa-miR-9-5p	up	MIR497HG	down
hsa-miR-101-3p	up	CPEB1	down	CPEB1	protein_coding	down	MBNL1-AS1	lincRNA	down	0.885524	1	0.885524	hsa-miR-101-3p	up	MBNL1-AS1	down
hsa-miR-101-3p	up	CPEB1	down	CPEB1	protein_coding	down	AL356489.2	lincRNA	down	0.878023	1	0.878023	hsa-miR-101-3p	up	AL356489.2	down
hsa-miR-452-5p	up	CPEB1	down	CPEB1	protein_coding	down	MBNL1-AS1	lincRNA	down	0.885524	1	0.885524	hsa-miR-452-5p	up	MBNL1-AS1	down
hsa-miR-452-5p	up	CPEB1	down	CPEB1	protein_coding	down	AC036108.3	lincRNA	down	0.852157	1	0.852157	hsa-miR-452-5p	up	AC036108.3	down
hsa-miR-452-5p	up	CPEB1	down	CPEB1	protein_coding	down	AL356489.2	lincRNA	down	0.878023	1	0.878023	hsa-miR-452-5p	up	AL356489.2	down
hsa-miR-22-3p	up	CPEB1	down	CPEB1	protein_coding	down	MBNL1-AS1	lincRNA	down	0.885524	1	0.885524	hsa-miR-22-3p	up	MBNL1-AS1	down
hsa-miR-22-3p	up	CPEB1	down	CPEB1	protein_coding	down	MIR1-1HG-AS1	lincRNA	down	0.859132	1	0.859132	hsa-miR-22-3p	up	MIR1-1HG-AS1	down
hsa-miR-22-3p	up	CPEB1	down	CPEB1	protein_coding	down	MIR497HG	lincRNA	down	0.863831	1	0.863831	hsa-miR-22-3p	up	MIR497HG	down
hsa-miR-130a-3p	up	CPEB1	down	CPEB1	protein_coding	down	MBNL1-AS1	lincRNA	down	0.885524	1	0.885524	hsa-miR-130a-3p	up	MBNL1-AS1	down
hsa-miR-130a-3p	up	CPEB1	down	CPEB1	protein_coding	down	MIR1-1HG-AS1	lincRNA	down	0.859132	1	0.859132	hsa-miR-130a-3p	up	MIR1-1HG-AS1	down
hsa-miR-576-5p	up	CUX2	down	CUX2	protein_coding	down	LINC02078	lincRNA	down	0.866988	1	0.866988	hsa-miR-576-5p	up	LINC02078	down
hsa-miR-576-5p	up	CUX2	down	CUX2	protein_coding	down	AC022893.2	lincRNA	down	0.870411	1	0.870411	hsa-miR-576-5p	up	AC022893.2	down
hsa-miR-9-5p	up	DACT3	down	DACT3	protein_coding	down	MBNL1-AS1	lincRNA	down	0.888781	1	0.888781	hsa-miR-9-5p	up	MBNL1-AS1	down
hsa-miR-9-5p	up	DACT3	down	DACT3	protein_coding	down	AL513217.1	lincRNA	down	0.87814	1	0.87814	hsa-miR-9-5p	up	AL513217.1	down
hsa-miR-29b-3p	up	DCAF12L1	down	DCAF12L1	protein_coding	down	GPRACR	lincRNA	down	0.915834	1	0.915834	hsa-miR-29b-3p	up	GPRACR	down
hsa-miR-29b-3p	up	DCAF12L1	down	DCAF12L1	protein_coding	down	LINC01907	lincRNA	down	0.922253	1	0.922253	hsa-miR-29b-3p	up	LINC01907	down
hsa-miR-29b-3p	up	DCAF12L1	down	DCAF12L1	protein_coding	down	LINC02554	lincRNA	down	0.954988	1	0.954988	hsa-miR-29b-3p	up	LINC02554	down
hsa-miR-29b-3p	up	DCAF12L1	down	DCAF12L1	protein_coding	down	MIR137HG	lincRNA	down	0.884272	1	0.884272	hsa-miR-29b-3p	up	MIR137HG	down
hsa-miR-29b-3p	up	DCAF12L1	down	DCAF12L1	protein_coding	down	AQP4-AS1	lincRNA	down	0.914111	1	0.914111	hsa-miR-29b-3p	up	AQP4-AS1	down
hsa-miR-29b-3p	up	DCAF12L1	down	DCAF12L1	protein_coding	down	AC093390.1	lincRNA	down	0.859483	1	0.859483	hsa-miR-29b-3p	up	AC093390.1	down
hsa-miR-29c-3p	up	DCAF12L1	down	DCAF12L1	protein_coding	down	GPRACR	lincRNA	down	0.915834	1	0.915834	hsa-miR-29c-3p	up	GPRACR	down
hsa-miR-29c-3p	up	DCAF12L1	down	DCAF12L1	protein_coding	down	LINC01907	lincRNA	down	0.922253	1	0.922253	hsa-miR-29c-3p	up	LINC01907	down
hsa-miR-29c-3p	up	DCAF12L1	down	DCAF12L1	protein_coding	down	LINC02554	lincRNA	down	0.954988	1	0.954988	hsa-miR-29c-3p	up	LINC02554	down
hsa-miR-29c-3p	up	DCAF12L1	down	DCAF12L1	protein_coding	down	MIR137HG	lincRNA	down	0.884272	1	0.884272	hsa-miR-29c-3p	up	MIR137HG	down
hsa-miR-29c-3p	up	DCAF12L1	down	DCAF12L1	protein_coding	down	AQP4-AS1	lincRNA	down	0.914111	1	0.914111	hsa-miR-29c-3p	up	AQP4-AS1	down
hsa-miR-29c-3p	up	DCAF12L1	down	DCAF12L1	protein_coding	down	AC093390.1	lincRNA	down	0.859483	1	0.859483	hsa-miR-29c-3p	up	AC093390.1	down
hsa-miR-182-5p	up	DCX	down	DCX	protein_coding	down	AC022893.2	lincRNA	down	0.853829	1	0.853829	hsa-miR-182-5p	up	AC022893.2	down
hsa-miR-30b-5p	up	DCX	down	DCX	protein_coding	down	AC022893.2	lincRNA	down	0.853829	1	0.853829	hsa-miR-30b-5p	up	AC022893.2	down
hsa-miR-30e-5p	up	DCX	down	DCX	protein_coding	down	AC022893.2	lincRNA	down	0.853829	1	0.853829	hsa-miR-30e-5p	up	AC022893.2	down
hsa-miR-429	up	DCX	down	DCX	protein_coding	down	AC022893.2	lincRNA	down	0.853829	1	0.853829	hsa-miR-429	up	AC022893.2	down
hsa-miR-576-5p	up	DCX	down	DCX	protein_coding	down	AC022893.2	lincRNA	down	0.853829	1	0.853829	hsa-miR-576-5p	up	AC022893.2	down
hsa-miR-27a-3p	up	DCX	down	DCX	protein_coding	down	AC022893.2	lincRNA	down	0.853829	1	0.853829	hsa-miR-27a-3p	up	AC022893.2	down
hsa-miR-29b-3p	up	DCX	down	DCX	protein_coding	down	AC022893.2	lincRNA	down	0.853829	1	0.853829	hsa-miR-29b-3p	up	AC022893.2	down
hsa-miR-29c-3p	up	DCX	down	DCX	protein_coding	down	AC022893.2	lincRNA	down	0.853829	1	0.853829	hsa-miR-29c-3p	up	AC022893.2	down
hsa-miR-338-3p	up	DES	down	DES	protein_coding	down	MBNL1-AS1	lincRNA	down	0.890322	1	0.890322	hsa-miR-338-3p	up	MBNL1-AS1	down
hsa-miR-338-3p	up	DES	down	DES	protein_coding	down	AL513217.1	lincRNA	down	0.902975	1	0.902975	hsa-miR-338-3p	up	AL513217.1	down
hsa-miR-15a-5p	up	DIXDC1	down	DIXDC1	protein_coding	down	MBNL1-AS1	lincRNA	down	0.90326	1	0.90326	hsa-miR-15a-5p	up	MBNL1-AS1	down
hsa-miR-16-5p	up	DIXDC1	down	DIXDC1	protein_coding	down	MBNL1-AS1	lincRNA	down	0.90326	1	0.90326	hsa-miR-16-5p	up	MBNL1-AS1	down
hsa-miR-34a-5p	up	DIXDC1	down	DIXDC1	protein_coding	down	MBNL1-AS1	lincRNA	down	0.90326	1	0.90326	hsa-miR-34a-5p	up	MBNL1-AS1	down
hsa-miR-9-5p	up	DIXDC1	down	DIXDC1	protein_coding	down	MBNL1-AS1	lincRNA	down	0.90326	1	0.90326	hsa-miR-9-5p	up	MBNL1-AS1	down
hsa-miR-429	up	DIXDC1	down	DIXDC1	protein_coding	down	MBNL1-AS1	lincRNA	down	0.90326	1	0.90326	hsa-miR-429	up	MBNL1-AS1	down
hsa-miR-429	up	DIXDC1	down	DIXDC1	protein_coding	down	AC036108.3	lincRNA	down	0.865465	1	0.865465	hsa-miR-429	up	AC036108.3	down
hsa-let-7f-5p	up	DMD	down	DMD	protein_coding	down	MBNL1-AS1	lincRNA	down	0.85516	1	0.85516	hsa-let-7f-5p	up	MBNL1-AS1	down
hsa-let-7f-5p	up	DMD	down	DMD	protein_coding	down	AC036108.3	lincRNA	down	0.870338	1	0.870338	hsa-let-7f-5p	up	AC036108.3	down
hsa-miR-98-5p	up	DMD	down	DMD	protein_coding	down	MBNL1-AS1	lincRNA	down	0.85516	1	0.85516	hsa-miR-98-5p	up	MBNL1-AS1	down
hsa-miR-98-5p	up	DMD	down	DMD	protein_coding	down	AC036108.3	lincRNA	down	0.870338	1	0.870338	hsa-miR-98-5p	up	AC036108.3	down
hsa-let-7g-5p	up	DMD	down	DMD	protein_coding	down	MBNL1-AS1	lincRNA	down	0.85516	1	0.85516	hsa-let-7g-5p	up	MBNL1-AS1	down
hsa-miR-30b-5p	up	DMD	down	DMD	protein_coding	down	MBNL1-AS1	lincRNA	down	0.85516	1	0.85516	hsa-miR-30b-5p	up	MBNL1-AS1	down
hsa-miR-194-5p	up	DMD	down	DMD	protein_coding	down	AC036108.3	lincRNA	down	0.870338	1	0.870338	hsa-miR-194-5p	up	AC036108.3	down
hsa-miR-30e-5p	up	DMD	down	DMD	protein_coding	down	MBNL1-AS1	lincRNA	down	0.85516	1	0.85516	hsa-miR-30e-5p	up	MBNL1-AS1	down
hsa-let-7a-5p	down	DMP1	up	DMP1	protein_coding	up	GK-AS1	lincRNA	up	0.863693	1	0.863693	hsa-let-7a-5p	down	GK-AS1	up
hsa-let-7a-5p	down	DMP1	up	DMP1	protein_coding	up	INHBA-AS1	lincRNA	up	0.90682	1	0.90682	hsa-let-7a-5p	down	INHBA-AS1	up
hsa-let-7a-5p	down	DMP1	up	DMP1	protein_coding	up	LINC00862	lincRNA	up	0.889762	1	0.889762	hsa-let-7a-5p	down	LINC00862	up
hsa-let-7a-5p	down	DMP1	up	DMP1	protein_coding	up	LINC01851	lincRNA	up	0.861869	1	0.861869	hsa-let-7a-5p	down	LINC01851	up
hsa-let-7a-5p	down	DMP1	up	DMP1	protein_coding	up	LINC02507	lincRNA	up	0.851214	1	0.851214	hsa-let-7a-5p	down	LINC02507	up
hsa-let-7a-5p	down	DMP1	up	DMP1	protein_coding	up	LIPC-AS1	lincRNA	up	0.868878	1	0.868878	hsa-let-7a-5p	down	LIPC-AS1	up
hsa-let-7a-5p	down	DMP1	up	DMP1	protein_coding	up	LUCAT1	lincRNA	up	0.913679	1	0.913679	hsa-let-7a-5p	down	LUCAT1	up
hsa-let-7a-5p	down	DMP1	up	DMP1	protein_coding	up	PAPPA-AS2	lincRNA	up	0.893185	1	0.893185	hsa-let-7a-5p	down	PAPPA-AS2	up
hsa-let-7a-5p	down	DMP1	up	DMP1	protein_coding	up	TEX41	lincRNA	up	0.947294	1	0.947294	hsa-let-7a-5p	down	TEX41	up
hsa-let-7a-5p	down	DMP1	up	DMP1	protein_coding	up	AC011352.3	lincRNA	up	0.898484	1	0.898484	hsa-let-7a-5p	down	AC011352.3	up
hsa-let-7a-5p	down	DMP1	up	DMP1	protein_coding	up	AC074286.1	lincRNA	up	0.85536	1	0.85536	hsa-let-7a-5p	down	AC074286.1	up
hsa-let-7a-5p	down	DMP1	up	DMP1	protein_coding	up	AP002518.1	lincRNA	up	0.858035	1	0.858035	hsa-let-7a-5p	down	AP002518.1	up
hsa-let-7a-5p	down	DMP1	up	DMP1	protein_coding	up	AC112178.1	lincRNA	up	0.864354	1	0.864354	hsa-let-7a-5p	down	AC112178.1	up
hsa-let-7b-5p	down	DMP1	up	DMP1	protein_coding	up	GK-AS1	lincRNA	up	0.863693	1	0.863693	hsa-let-7b-5p	down	GK-AS1	up
hsa-let-7b-5p	down	DMP1	up	DMP1	protein_coding	up	INHBA-AS1	lincRNA	up	0.90682	1	0.90682	hsa-let-7b-5p	down	INHBA-AS1	up
hsa-let-7b-5p	down	DMP1	up	DMP1	protein_coding	up	LINC00862	lincRNA	up	0.889762	1	0.889762	hsa-let-7b-5p	down	LINC00862	up
hsa-let-7b-5p	down	DMP1	up	DMP1	protein_coding	up	LINC01338	lincRNA	up	0.94333	1	0.94333	hsa-let-7b-5p	down	LINC01338	up
hsa-let-7b-5p	down	DMP1	up	DMP1	protein_coding	up	LINC01851	lincRNA	up	0.861869	1	0.861869	hsa-let-7b-5p	down	LINC01851	up
hsa-let-7b-5p	down	DMP1	up	DMP1	protein_coding	up	LINC02507	lincRNA	up	0.851214	1	0.851214	hsa-let-7b-5p	down	LINC02507	up
hsa-let-7b-5p	down	DMP1	up	DMP1	protein_coding	up	LIPC-AS1	lincRNA	up	0.868878	1	0.868878	hsa-let-7b-5p	down	LIPC-AS1	up
hsa-let-7b-5p	down	DMP1	up	DMP1	protein_coding	up	LUCAT1	lincRNA	up	0.913679	1	0.913679	hsa-let-7b-5p	down	LUCAT1	up
hsa-let-7b-5p	down	DMP1	up	DMP1	protein_coding	up	PAPPA-AS2	lincRNA	up	0.893185	1	0.893185	hsa-let-7b-5p	down	PAPPA-AS2	up
hsa-let-7b-5p	down	DMP1	up	DMP1	protein_coding	up	TEX41	lincRNA	up	0.947294	1	0.947294	hsa-let-7b-5p	down	TEX41	up
hsa-let-7b-5p	down	DMP1	up	DMP1	protein_coding	up	WASF3-AS1	lincRNA	up	0.935782	1	0.935782	hsa-let-7b-5p	down	WASF3-AS1	up
hsa-let-7b-5p	down	DMP1	up	DMP1	protein_coding	up	AC011352.3	lincRNA	up	0.898484	1	0.898484	hsa-let-7b-5p	down	AC011352.3	up
hsa-let-7b-5p	down	DMP1	up	DMP1	protein_coding	up	AC074286.1	lincRNA	up	0.85536	1	0.85536	hsa-let-7b-5p	down	AC074286.1	up
hsa-let-7b-5p	down	DMP1	up	DMP1	protein_coding	up	AP002518.1	lincRNA	up	0.858035	1	0.858035	hsa-let-7b-5p	down	AP002518.1	up
hsa-let-7b-5p	down	DMP1	up	DMP1	protein_coding	up	AC112178.1	lincRNA	up	0.864354	1	0.864354	hsa-let-7b-5p	down	AC112178.1	up
hsa-let-7c-5p	down	DMP1	up	DMP1	protein_coding	up	GK-AS1	lincRNA	up	0.863693	1	0.863693	hsa-let-7c-5p	down	GK-AS1	up
hsa-let-7c-5p	down	DMP1	up	DMP1	protein_coding	up	INHBA-AS1	lincRNA	up	0.90682	1	0.90682	hsa-let-7c-5p	down	INHBA-AS1	up
hsa-let-7c-5p	down	DMP1	up	DMP1	protein_coding	up	LINC00862	lincRNA	up	0.889762	1	0.889762	hsa-let-7c-5p	down	LINC00862	up
hsa-let-7c-5p	down	DMP1	up	DMP1	protein_coding	up	LINC01338	lincRNA	up	0.94333	1	0.94333	hsa-let-7c-5p	down	LINC01338	up
hsa-let-7c-5p	down	DMP1	up	DMP1	protein_coding	up	LINC01851	lincRNA	up	0.861869	1	0.861869	hsa-let-7c-5p	down	LINC01851	up
hsa-let-7c-5p	down	DMP1	up	DMP1	protein_coding	up	LINC02507	lincRNA	up	0.851214	1	0.851214	hsa-let-7c-5p	down	LINC02507	up
hsa-let-7c-5p	down	DMP1	up	DMP1	protein_coding	up	LIPC-AS1	lincRNA	up	0.868878	1	0.868878	hsa-let-7c-5p	down	LIPC-AS1	up
hsa-let-7c-5p	down	DMP1	up	DMP1	protein_coding	up	LUCAT1	lincRNA	up	0.913679	1	0.913679	hsa-let-7c-5p	down	LUCAT1	up
hsa-let-7c-5p	down	DMP1	up	DMP1	protein_coding	up	PAPPA-AS2	lincRNA	up	0.893185	1	0.893185	hsa-let-7c-5p	down	PAPPA-AS2	up
hsa-let-7c-5p	down	DMP1	up	DMP1	protein_coding	up	TEX41	lincRNA	up	0.947294	1	0.947294	hsa-let-7c-5p	down	TEX41	up
hsa-let-7c-5p	down	DMP1	up	DMP1	protein_coding	up	WASF3-AS1	lincRNA	up	0.935782	1	0.935782	hsa-let-7c-5p	down	WASF3-AS1	up
hsa-let-7c-5p	down	DMP1	up	DMP1	protein_coding	up	AC011352.3	lincRNA	up	0.898484	1	0.898484	hsa-let-7c-5p	down	AC011352.3	up
hsa-let-7c-5p	down	DMP1	up	DMP1	protein_coding	up	AC074286.1	lincRNA	up	0.85536	1	0.85536	hsa-let-7c-5p	down	AC074286.1	up
hsa-let-7c-5p	down	DMP1	up	DMP1	protein_coding	up	AP002518.1	lincRNA	up	0.858035	1	0.858035	hsa-let-7c-5p	down	AP002518.1	up
hsa-let-7c-5p	down	DMP1	up	DMP1	protein_coding	up	AC107953.2	lincRNA	up	0.911312	1	0.911312	hsa-let-7c-5p	down	AC107953.2	up
hsa-let-7c-5p	down	DMP1	up	DMP1	protein_coding	up	AC112178.1	lincRNA	up	0.864354	1	0.864354	hsa-let-7c-5p	down	AC112178.1	up
hsa-let-7e-5p	down	DMP1	up	DMP1	protein_coding	up	GK-AS1	lincRNA	up	0.863693	1	0.863693	hsa-let-7e-5p	down	GK-AS1	up
hsa-let-7e-5p	down	DMP1	up	DMP1	protein_coding	up	INHBA-AS1	lincRNA	up	0.90682	1	0.90682	hsa-let-7e-5p	down	INHBA-AS1	up
hsa-let-7e-5p	down	DMP1	up	DMP1	protein_coding	up	LINC00862	lincRNA	up	0.889762	1	0.889762	hsa-let-7e-5p	down	LINC00862	up
hsa-let-7e-5p	down	DMP1	up	DMP1	protein_coding	up	LINC01851	lincRNA	up	0.861869	1	0.861869	hsa-let-7e-5p	down	LINC01851	up
hsa-let-7e-5p	down	DMP1	up	DMP1	protein_coding	up	LINC02507	lincRNA	up	0.851214	1	0.851214	hsa-let-7e-5p	down	LINC02507	up
hsa-let-7e-5p	down	DMP1	up	DMP1	protein_coding	up	LIPC-AS1	lincRNA	up	0.868878	1	0.868878	hsa-let-7e-5p	down	LIPC-AS1	up
hsa-let-7e-5p	down	DMP1	up	DMP1	protein_coding	up	LUCAT1	lincRNA	up	0.913679	1	0.913679	hsa-let-7e-5p	down	LUCAT1	up
hsa-let-7e-5p	down	DMP1	up	DMP1	protein_coding	up	PAPPA-AS2	lincRNA	up	0.893185	1	0.893185	hsa-let-7e-5p	down	PAPPA-AS2	up
hsa-let-7e-5p	down	DMP1	up	DMP1	protein_coding	up	TEX41	lincRNA	up	0.947294	1	0.947294	hsa-let-7e-5p	down	TEX41	up
hsa-let-7e-5p	down	DMP1	up	DMP1	protein_coding	up	WASF3-AS1	lincRNA	up	0.935782	1	0.935782	hsa-let-7e-5p	down	WASF3-AS1	up
hsa-let-7e-5p	down	DMP1	up	DMP1	protein_coding	up	AC011352.3	lincRNA	up	0.898484	1	0.898484	hsa-let-7e-5p	down	AC011352.3	up
hsa-let-7e-5p	down	DMP1	up	DMP1	protein_coding	up	AC074286.1	lincRNA	up	0.85536	1	0.85536	hsa-let-7e-5p	down	AC074286.1	up
hsa-let-7e-5p	down	DMP1	up	DMP1	protein_coding	up	AP002518.1	lincRNA	up	0.858035	1	0.858035	hsa-let-7e-5p	down	AP002518.1	up
hsa-let-7e-5p	down	DMP1	up	DMP1	protein_coding	up	AC112178.1	lincRNA	up	0.864354	1	0.864354	hsa-let-7e-5p	down	AC112178.1	up
hsa-miR-26a-5p	up	DNAJB5	down	DNAJB5	protein_coding	down	MBNL1-AS1	lincRNA	down	0.898318	1	0.898318	hsa-miR-26a-5p	up	MBNL1-AS1	down
hsa-miR-26a-5p	up	DNAJB5	down	DNAJB5	protein_coding	down	AL513217.1	lincRNA	down	0.872295	1	0.872295	hsa-miR-26a-5p	up	AL513217.1	down
hsa-miR-26b-5p	up	DNAJB5	down	DNAJB5	protein_coding	down	MBNL1-AS1	lincRNA	down	0.898318	1	0.898318	hsa-miR-26b-5p	up	MBNL1-AS1	down
hsa-miR-26b-5p	up	DNAJB5	down	DNAJB5	protein_coding	down	AL513217.1	lincRNA	down	0.872295	1	0.872295	hsa-miR-26b-5p	up	AL513217.1	down
hsa-miR-429	up	DNAJB5	down	DNAJB5	protein_coding	down	MBNL1-AS1	lincRNA	down	0.898318	1	0.898318	hsa-miR-429	up	MBNL1-AS1	down
hsa-miR-429	up	DNAJB5	down	DNAJB5	protein_coding	down	AL513217.1	lincRNA	down	0.872295	1	0.872295	hsa-miR-429	up	AL513217.1	down
hsa-miR-22-3p	up	DNAJB5	down	DNAJB5	protein_coding	down	MBNL1-AS1	lincRNA	down	0.898318	1	0.898318	hsa-miR-22-3p	up	MBNL1-AS1	down
hsa-miR-22-3p	up	DNAJB5	down	DNAJB5	protein_coding	down	AL513217.1	lincRNA	down	0.872295	1	0.872295	hsa-miR-22-3p	up	AL513217.1	down
hsa-miR-17-5p	up	DPYSL5	down	DPYSL5	protein_coding	down	MIR7-3HG	lincRNA	down	0.943385	1	0.943385	hsa-miR-17-5p	up	MIR7-3HG	down
hsa-miR-20a-5p	up	DPYSL5	down	DPYSL5	protein_coding	down	MIR7-3HG	lincRNA	down	0.943385	1	0.943385	hsa-miR-20a-5p	up	MIR7-3HG	down
hsa-miR-106a-5p	up	DPYSL5	down	DPYSL5	protein_coding	down	MIR7-3HG	lincRNA	down	0.943385	1	0.943385	hsa-miR-106a-5p	up	MIR7-3HG	down
hsa-miR-30b-5p	up	EML1	down	EML1	protein_coding	down	HAND2-AS1	lincRNA	down	0.880255	1	0.880255	hsa-miR-30b-5p	up	HAND2-AS1	down
hsa-miR-30b-5p	up	EML1	down	EML1	protein_coding	down	MBNL1-AS1	lincRNA	down	0.870973	1	0.870973	hsa-miR-30b-5p	up	MBNL1-AS1	down
hsa-miR-30e-5p	up	EML1	down	EML1	protein_coding	down	HAND2-AS1	lincRNA	down	0.880255	1	0.880255	hsa-miR-30e-5p	up	HAND2-AS1	down
hsa-miR-30e-5p	up	EML1	down	EML1	protein_coding	down	MBNL1-AS1	lincRNA	down	0.870973	1	0.870973	hsa-miR-30e-5p	up	MBNL1-AS1	down
hsa-miR-584-5p	up	EML1	down	EML1	protein_coding	down	HAND2-AS1	lincRNA	down	0.880255	1	0.880255	hsa-miR-584-5p	up	HAND2-AS1	down
hsa-miR-584-5p	up	EML1	down	EML1	protein_coding	down	MBNL1-AS1	lincRNA	down	0.870973	1	0.870973	hsa-miR-584-5p	up	MBNL1-AS1	down
hsa-miR-27a-3p	up	EML1	down	EML1	protein_coding	down	HAND2-AS1	lincRNA	down	0.880255	1	0.880255	hsa-miR-27a-3p	up	HAND2-AS1	down
hsa-miR-27a-3p	up	EML1	down	EML1	protein_coding	down	MBNL1-AS1	lincRNA	down	0.870973	1	0.870973	hsa-miR-27a-3p	up	MBNL1-AS1	down
hsa-miR-17-3p	up	EPHA6	down	EPHA6	protein_coding	down	HAND2-AS1	lincRNA	down	0.887888	1	0.887888	hsa-miR-17-3p	up	HAND2-AS1	down
hsa-miR-17-5p	up	FAM129A	down	FAM129A	protein_coding	down	HAND2-AS1	lincRNA	down	0.928299	1	0.928299	hsa-miR-17-5p	up	HAND2-AS1	down
hsa-miR-17-5p	up	FAM129A	down	FAM129A	protein_coding	down	MBNL1-AS1	lincRNA	down	0.879185	1	0.879185	hsa-miR-17-5p	up	MBNL1-AS1	down
hsa-miR-20a-5p	up	FAM129A	down	FAM129A	protein_coding	down	HAND2-AS1	lincRNA	down	0.928299	1	0.928299	hsa-miR-20a-5p	up	HAND2-AS1	down
hsa-miR-20a-5p	up	FAM129A	down	FAM129A	protein_coding	down	MBNL1-AS1	lincRNA	down	0.879185	1	0.879185	hsa-miR-20a-5p	up	MBNL1-AS1	down
hsa-miR-20a-5p	up	FAM129A	down	FAM129A	protein_coding	down	AC009102.2	lincRNA	down	0.900706	1	0.900706	hsa-miR-20a-5p	up	AC009102.2	down
hsa-miR-106a-5p	up	FAM129A	down	FAM129A	protein_coding	down	HAND2-AS1	lincRNA	down	0.928299	1	0.928299	hsa-miR-106a-5p	up	HAND2-AS1	down
hsa-miR-106a-5p	up	FAM129A	down	FAM129A	protein_coding	down	MBNL1-AS1	lincRNA	down	0.879185	1	0.879185	hsa-miR-106a-5p	up	MBNL1-AS1	down
hsa-miR-106b-5p	up	FAM129A	down	FAM129A	protein_coding	down	HAND2-AS1	lincRNA	down	0.928299	1	0.928299	hsa-miR-106b-5p	up	HAND2-AS1	down
hsa-miR-106b-5p	up	FAM129A	down	FAM129A	protein_coding	down	MBNL1-AS1	lincRNA	down	0.879185	1	0.879185	hsa-miR-106b-5p	up	MBNL1-AS1	down
hsa-miR-106b-5p	up	FAM129A	down	FAM129A	protein_coding	down	AC009102.2	lincRNA	down	0.900706	1	0.900706	hsa-miR-106b-5p	up	AC009102.2	down
hsa-miR-15a-5p	up	FERMT2	down	FERMT2	protein_coding	down	MBNL1-AS1	lincRNA	down	0.883265	1	0.883265	hsa-miR-15a-5p	up	MBNL1-AS1	down
hsa-miR-15a-5p	up	FERMT2	down	FERMT2	protein_coding	down	ZNF667-AS1	lincRNA	down	0.888098	1	0.888098	hsa-miR-15a-5p	up	ZNF667-AS1	down
hsa-miR-16-5p	up	FERMT2	down	FERMT2	protein_coding	down	MBNL1-AS1	lincRNA	down	0.883265	1	0.883265	hsa-miR-16-5p	up	MBNL1-AS1	down
hsa-miR-16-5p	up	FERMT2	down	FERMT2	protein_coding	down	ZNF667-AS1	lincRNA	down	0.888098	1	0.888098	hsa-miR-16-5p	up	ZNF667-AS1	down
hsa-miR-29b-3p	up	FERMT2	down	FERMT2	protein_coding	down	MBNL1-AS1	lincRNA	down	0.883265	1	0.883265	hsa-miR-29b-3p	up	MBNL1-AS1	down
hsa-miR-130a-3p	up	FERMT2	down	FERMT2	protein_coding	down	MBNL1-AS1	lincRNA	down	0.883265	1	0.883265	hsa-miR-130a-3p	up	MBNL1-AS1	down
hsa-miR-130a-3p	up	FERMT2	down	FERMT2	protein_coding	down	ZNF667-AS1	lincRNA	down	0.888098	1	0.888098	hsa-miR-130a-3p	up	ZNF667-AS1	down
hsa-miR-29c-3p	up	FERMT2	down	FERMT2	protein_coding	down	MBNL1-AS1	lincRNA	down	0.883265	1	0.883265	hsa-miR-29c-3p	up	MBNL1-AS1	down
hsa-miR-582-3p	up	FERMT2	down	FERMT2	protein_coding	down	ZNF667-AS1	lincRNA	down	0.888098	1	0.888098	hsa-miR-582-3p	up	ZNF667-AS1	down
hsa-miR-429	up	FHL1	down	FHL1	protein_coding	down	HAND2-AS1	lincRNA	down	0.887315	1	0.887315	hsa-miR-429	up	HAND2-AS1	down
hsa-let-7f-5p	up	FIGN	down	FIGN	protein_coding	down	ADAMTS9-AS2	lincRNA	down	0.899367	1	0.899367	hsa-let-7f-5p	up	ADAMTS9-AS2	down
hsa-let-7f-5p	up	FIGN	down	FIGN	protein_coding	down	AC092376.2	lincRNA	down	0.907147	1	0.907147	hsa-let-7f-5p	up	AC092376.2	down
hsa-miR-98-5p	up	FIGN	down	FIGN	protein_coding	down	RBMS3-AS3	lincRNA	down	0.861977	1	0.861977	hsa-miR-98-5p	up	RBMS3-AS3	down
hsa-miR-98-5p	up	FIGN	down	FIGN	protein_coding	down	ADAMTS9-AS2	lincRNA	down	0.899367	1	0.899367	hsa-miR-98-5p	up	ADAMTS9-AS2	down
hsa-miR-10a-5p	up	FIGN	down	FIGN	protein_coding	down	LINC01266	lincRNA	down	0.855388	1	0.855388	hsa-miR-10a-5p	up	LINC01266	down
hsa-miR-10a-5p	up	FIGN	down	FIGN	protein_coding	down	ADAMTS9-AS2	lincRNA	down	0.899367	1	0.899367	hsa-miR-10a-5p	up	ADAMTS9-AS2	down
hsa-miR-10b-5p	up	FIGN	down	FIGN	protein_coding	down	LINC01266	lincRNA	down	0.855388	1	0.855388	hsa-miR-10b-5p	up	LINC01266	down
hsa-miR-10b-5p	up	FIGN	down	FIGN	protein_coding	down	ADAMTS9-AS2	lincRNA	down	0.899367	1	0.899367	hsa-miR-10b-5p	up	ADAMTS9-AS2	down
hsa-miR-182-5p	up	FIGN	down	FIGN	protein_coding	down	LINC01266	lincRNA	down	0.855388	1	0.855388	hsa-miR-182-5p	up	LINC01266	down
hsa-miR-182-5p	up	FIGN	down	FIGN	protein_coding	down	RBMS3-AS3	lincRNA	down	0.861977	1	0.861977	hsa-miR-182-5p	up	RBMS3-AS3	down
hsa-miR-182-5p	up	FIGN	down	FIGN	protein_coding	down	ADAMTS9-AS2	lincRNA	down	0.899367	1	0.899367	hsa-miR-182-5p	up	ADAMTS9-AS2	down
hsa-miR-182-5p	up	FIGN	down	FIGN	protein_coding	down	AC092376.2	lincRNA	down	0.907147	1	0.907147	hsa-miR-182-5p	up	AC092376.2	down
hsa-let-7g-5p	up	FIGN	down	FIGN	protein_coding	down	RBMS3-AS3	lincRNA	down	0.861977	1	0.861977	hsa-let-7g-5p	up	RBMS3-AS3	down
hsa-let-7g-5p	up	FIGN	down	FIGN	protein_coding	down	ADAMTS9-AS2	lincRNA	down	0.899367	1	0.899367	hsa-let-7g-5p	up	ADAMTS9-AS2	down
hsa-let-7g-5p	up	FIGN	down	FIGN	protein_coding	down	AC092376.2	lincRNA	down	0.907147	1	0.907147	hsa-let-7g-5p	up	AC092376.2	down
hsa-miR-30b-5p	up	FIGN	down	FIGN	protein_coding	down	RBMS3-AS3	lincRNA	down	0.861977	1	0.861977	hsa-miR-30b-5p	up	RBMS3-AS3	down
hsa-miR-30b-5p	up	FIGN	down	FIGN	protein_coding	down	AC092376.2	lincRNA	down	0.907147	1	0.907147	hsa-miR-30b-5p	up	AC092376.2	down
hsa-miR-30e-5p	up	FIGN	down	FIGN	protein_coding	down	AC092376.2	lincRNA	down	0.907147	1	0.907147	hsa-miR-30e-5p	up	AC092376.2	down
hsa-miR-429	up	FIGN	down	FIGN	protein_coding	down	LINC01266	lincRNA	down	0.855388	1	0.855388	hsa-miR-429	up	LINC01266	down
hsa-miR-429	up	FIGN	down	FIGN	protein_coding	down	AC092376.2	lincRNA	down	0.907147	1	0.907147	hsa-miR-429	up	AC092376.2	down
hsa-miR-203b-3p	up	FIGN	down	FIGN	protein_coding	down	LINC01266	lincRNA	down	0.855388	1	0.855388	hsa-miR-203b-3p	up	LINC01266	down
hsa-miR-203b-3p	up	FIGN	down	FIGN	protein_coding	down	ADAMTS9-AS2	lincRNA	down	0.899367	1	0.899367	hsa-miR-203b-3p	up	ADAMTS9-AS2	down
hsa-miR-203b-3p	up	FIGN	down	FIGN	protein_coding	down	AC092376.2	lincRNA	down	0.907147	1	0.907147	hsa-miR-203b-3p	up	AC092376.2	down
hsa-miR-101-3p	up	FOXF1	down	FOXF1	protein_coding	down	FENDRR	lincRNA	down	0.888171	1	0.888171	hsa-miR-101-3p	up	FENDRR	down
hsa-miR-148a-3p	up	FOXF1	down	FOXF1	protein_coding	down	FENDRR	lincRNA	down	0.888171	1	0.888171	hsa-miR-148a-3p	up	FENDRR	down
hsa-miR-152-3p	up	FOXF1	down	FOXF1	protein_coding	down	FENDRR	lincRNA	down	0.888171	1	0.888171	hsa-miR-152-3p	up	FENDRR	down
hsa-miR-182-5p	up	FOXF2	down	FOXF2	protein_coding	down	FENDRR	lincRNA	down	0.885344	1	0.885344	hsa-miR-182-5p	up	FENDRR	down
hsa-miR-9-5p	up	FRMPD4	down	FRMPD4	protein_coding	down	HAND2-AS1	lincRNA	down	0.855802	1	0.855802	hsa-miR-9-5p	up	HAND2-AS1	down
hsa-miR-9-5p	up	FRMPD4	down	FRMPD4	protein_coding	down	AC009102.2	lincRNA	down	0.873193	1	0.873193	hsa-miR-9-5p	up	AC009102.2	down
hsa-miR-9-5p	up	FRMPD4	down	FRMPD4	protein_coding	down	AC069133.1	lincRNA	down	0.864146	1	0.864146	hsa-miR-9-5p	up	AC069133.1	down
hsa-miR-374b-5p	up	FRMPD4	down	FRMPD4	protein_coding	down	HAND2-AS1	lincRNA	down	0.855802	1	0.855802	hsa-miR-374b-5p	up	HAND2-AS1	down
hsa-miR-374b-5p	up	FRMPD4	down	FRMPD4	protein_coding	down	AF001548.1	lincRNA	down	0.90268	1	0.90268	hsa-miR-374b-5p	up	AF001548.1	down
hsa-miR-374b-5p	up	FRMPD4	down	FRMPD4	protein_coding	down	AL356489.2	lincRNA	down	0.892177	1	0.892177	hsa-miR-374b-5p	up	AL356489.2	down
hsa-miR-21-3p	up	FRMPD4	down	FRMPD4	protein_coding	down	HAND2-AS1	lincRNA	down	0.855802	1	0.855802	hsa-miR-21-3p	up	HAND2-AS1	down
hsa-miR-24-3p	up	GAL3ST3	down	GAL3ST3	protein_coding	down	GPRACR	lincRNA	down	0.866169	1	0.866169	hsa-miR-24-3p	up	GPRACR	down
hsa-miR-24-3p	up	GAL3ST3	down	GAL3ST3	protein_coding	down	LINC02554	lincRNA	down	0.890739	1	0.890739	hsa-miR-24-3p	up	LINC02554	down
hsa-miR-24-3p	up	GAL3ST3	down	GAL3ST3	protein_coding	down	AC026469.1	lincRNA	down	0.851702	1	0.851702	hsa-miR-24-3p	up	AC026469.1	down
hsa-miR-24-3p	up	GAL3ST3	down	GAL3ST3	protein_coding	down	AP003064.2	lincRNA	down	0.858411	1	0.858411	hsa-miR-24-3p	up	AP003064.2	down
hsa-miR-24-3p	up	GAL3ST3	down	GAL3ST3	protein_coding	down	AL772337.2	lincRNA	down	0.857422	1	0.857422	hsa-miR-24-3p	up	AL772337.2	down
hsa-miR-24-3p	up	GAL3ST3	down	GAL3ST3	protein_coding	down	AC026688.2	lincRNA	down	0.888435	1	0.888435	hsa-miR-24-3p	up	AC026688.2	down
hsa-miR-24-3p	up	GAL3ST3	down	GAL3ST3	protein_coding	down	AC139099.2	lincRNA	down	0.914953	1	0.914953	hsa-miR-24-3p	up	AC139099.2	down
hsa-miR-150-5p	down	GCM2	up	GCM2	protein_coding	up	LATS2-AS1	lincRNA	up	0.891591	1	0.891591	hsa-miR-150-5p	down	LATS2-AS1	up
hsa-miR-150-5p	down	GCM2	up	GCM2	protein_coding	up	LINC00562	lincRNA	up	0.880369	1	0.880369	hsa-miR-150-5p	down	LINC00562	up
hsa-miR-150-5p	down	GCM2	up	GCM2	protein_coding	up	LINC02516	lincRNA	up	0.866785	1	0.866785	hsa-miR-150-5p	down	LINC02516	up
hsa-miR-150-5p	down	GCM2	up	GCM2	protein_coding	up	MANEA-DT	lincRNA	up	0.870772	1	0.870772	hsa-miR-150-5p	down	MANEA-DT	up
hsa-miR-150-5p	down	GCM2	up	GCM2	protein_coding	up	RNASEH2B-AS1	lincRNA	up	0.94066	1	0.94066	hsa-miR-150-5p	down	RNASEH2B-AS1	up
hsa-miR-150-5p	down	GCM2	up	GCM2	protein_coding	up	SPIN4-AS1	lincRNA	up	0.871499	1	0.871499	hsa-miR-150-5p	down	SPIN4-AS1	up
hsa-miR-150-5p	down	GCM2	up	GCM2	protein_coding	up	DLEU2	lincRNA	up	0.918211	1	0.918211	hsa-miR-150-5p	down	DLEU2	up
hsa-miR-150-5p	down	GCM2	up	GCM2	protein_coding	up	AC108463.3	lincRNA	up	0.866606	1	0.866606	hsa-miR-150-5p	down	AC108463.3	up
hsa-miR-150-5p	down	GCM2	up	GCM2	protein_coding	up	AL080317.2	lincRNA	up	0.878821	1	0.878821	hsa-miR-150-5p	down	AL080317.2	up
hsa-miR-150-5p	down	GCM2	up	GCM2	protein_coding	up	FSIP2-AS1	lincRNA	up	0.858035	1	0.858035	hsa-miR-150-5p	down	FSIP2-AS1	up
hsa-miR-150-5p	down	GCM2	up	GCM2	protein_coding	up	AC008700.1	lincRNA	up	0.870184	1	0.870184	hsa-miR-150-5p	down	AC008700.1	up
hsa-miR-150-5p	down	GCM2	up	GCM2	protein_coding	up	AC023632.5	lincRNA	up	0.856585	1	0.856585	hsa-miR-150-5p	down	AC023632.5	up
hsa-miR-150-5p	down	GCM2	up	GCM2	protein_coding	up	AL109935.1	lincRNA	up	0.854597	1	0.854597	hsa-miR-150-5p	down	AL109935.1	up
hsa-miR-150-5p	down	GCM2	up	GCM2	protein_coding	up	AL513548.3	lincRNA	up	0.888953	1	0.888953	hsa-miR-150-5p	down	AL513548.3	up
hsa-miR-150-5p	down	GCM2	up	GCM2	protein_coding	up	AC005899.5	lincRNA	up	0.924365	1	0.924365	hsa-miR-150-5p	down	AC005899.5	up
hsa-miR-150-5p	down	GCM2	up	GCM2	protein_coding	up	AC090518.1	lincRNA	up	0.915695	1	0.915695	hsa-miR-150-5p	down	AC090518.1	up
hsa-miR-150-5p	down	GCM2	up	GCM2	protein_coding	up	AC024475.1	lincRNA	up	0.85917	1	0.85917	hsa-miR-150-5p	down	AC024475.1	up
hsa-miR-150-5p	down	GCM2	up	GCM2	protein_coding	up	ETS1-AS1	lincRNA	up	0.86576	1	0.86576	hsa-miR-150-5p	down	ETS1-AS1	up
hsa-miR-150-5p	down	GCM2	up	GCM2	protein_coding	up	AP005131.1	lincRNA	up	0.868551	1	0.868551	hsa-miR-150-5p	down	AP005131.1	up
hsa-miR-150-5p	down	GCM2	up	GCM2	protein_coding	up	AL445465.1	lincRNA	up	0.864128	1	0.864128	hsa-miR-150-5p	down	AL445465.1	up
hsa-miR-150-5p	down	GCM2	up	GCM2	protein_coding	up	CYYR1-AS1	lincRNA	up	0.892846	1	0.892846	hsa-miR-150-5p	down	CYYR1-AS1	up
hsa-miR-92a-3p	down	GLRA1	up	GLRA1	protein_coding	up	PLCG1-AS1	lincRNA	up	0.866746	1	0.866746	hsa-miR-92a-3p	down	PLCG1-AS1	up
hsa-miR-92a-3p	down	GLRA1	up	GLRA1	protein_coding	up	PRICKLE2-AS3	lincRNA	up	0.851403	1	0.851403	hsa-miR-92a-3p	down	PRICKLE2-AS3	up
hsa-miR-92a-3p	down	GLRA1	up	GLRA1	protein_coding	up	PRKG1-AS1	lincRNA	up	0.901514	1	0.901514	hsa-miR-92a-3p	down	PRKG1-AS1	up
hsa-miR-92a-3p	down	GLRA1	up	GLRA1	protein_coding	up	RAPGEF4-AS1	lincRNA	up	0.880432	1	0.880432	hsa-miR-92a-3p	down	RAPGEF4-AS1	up
hsa-miR-92a-3p	down	GLRA1	up	GLRA1	protein_coding	up	RDH10-AS1	lincRNA	up	0.892459	1	0.892459	hsa-miR-92a-3p	down	RDH10-AS1	up
hsa-miR-92a-3p	down	GLRA1	up	GLRA1	protein_coding	up	AL080317.2	lincRNA	up	0.881227	1	0.881227	hsa-miR-92a-3p	down	AL080317.2	up
hsa-miR-92a-3p	down	GLRA1	up	GLRA1	protein_coding	up	AC007938.2	lincRNA	up	0.852581	1	0.852581	hsa-miR-92a-3p	down	AC007938.2	up
hsa-miR-92a-3p	down	GLRA1	up	GLRA1	protein_coding	up	AL354733.2	lincRNA	up	0.893682	1	0.893682	hsa-miR-92a-3p	down	AL354733.2	up
hsa-miR-92a-3p	down	GLRA1	up	GLRA1	protein_coding	up	AL157938.3	lincRNA	up	0.8722	1	0.8722	hsa-miR-92a-3p	down	AL157938.3	up
hsa-miR-92a-3p	down	GLRA1	up	GLRA1	protein_coding	up	AC022540.1	lincRNA	up	0.892266	1	0.892266	hsa-miR-92a-3p	down	AC022540.1	up
hsa-miR-92a-3p	down	GLRA1	up	GLRA1	protein_coding	up	AL359094.1	lincRNA	up	0.869696	1	0.869696	hsa-miR-92a-3p	down	AL359094.1	up
hsa-miR-92a-3p	down	GLRA1	up	GLRA1	protein_coding	up	AC026401.1	lincRNA	up	0.85155	1	0.85155	hsa-miR-92a-3p	down	AC026401.1	up
hsa-miR-92a-3p	down	GLRA1	up	GLRA1	protein_coding	up	AL355613.1	lincRNA	up	0.859648	1	0.859648	hsa-miR-92a-3p	down	AL355613.1	up
hsa-miR-92a-3p	down	GLRA1	up	GLRA1	protein_coding	up	AL022097.1	lincRNA	up	0.861372	1	0.861372	hsa-miR-92a-3p	down	AL022097.1	up
hsa-miR-92a-3p	down	GLRA1	up	GLRA1	protein_coding	up	ENOX1-AS1	lincRNA	up	0.871561	1	0.871561	hsa-miR-92a-3p	down	ENOX1-AS1	up
hsa-miR-92a-3p	down	GLRA1	up	GLRA1	protein_coding	up	AC100800.1	lincRNA	up	0.893614	1	0.893614	hsa-miR-92a-3p	down	AC100800.1	up
hsa-miR-92a-3p	down	GLRA1	up	GLRA1	protein_coding	up	AC090337.1	lincRNA	up	0.902014	1	0.902014	hsa-miR-92a-3p	down	AC090337.1	up
hsa-miR-92a-3p	down	GLRA1	up	GLRA1	protein_coding	up	AC109466.1	lincRNA	up	0.854762	1	0.854762	hsa-miR-92a-3p	down	AC109466.1	up
hsa-miR-92a-3p	down	GLRA1	up	GLRA1	protein_coding	up	AC096708.2	lincRNA	up	0.911782	1	0.911782	hsa-miR-92a-3p	down	AC096708.2	up
hsa-miR-92b-3p	down	GLRA1	up	GLRA1	protein_coding	up	PLCG1-AS1	lincRNA	up	0.866746	1	0.866746	hsa-miR-92b-3p	down	PLCG1-AS1	up
hsa-miR-92b-3p	down	GLRA1	up	GLRA1	protein_coding	up	PRICKLE2-AS3	lincRNA	up	0.851403	1	0.851403	hsa-miR-92b-3p	down	PRICKLE2-AS3	up
hsa-miR-92b-3p	down	GLRA1	up	GLRA1	protein_coding	up	PRKG1-AS1	lincRNA	up	0.901514	1	0.901514	hsa-miR-92b-3p	down	PRKG1-AS1	up
hsa-miR-92b-3p	down	GLRA1	up	GLRA1	protein_coding	up	RAPGEF4-AS1	lincRNA	up	0.880432	1	0.880432	hsa-miR-92b-3p	down	RAPGEF4-AS1	up
hsa-miR-92b-3p	down	GLRA1	up	GLRA1	protein_coding	up	RBMS3-AS2	lincRNA	up	0.890965	1	0.890965	hsa-miR-92b-3p	down	RBMS3-AS2	up
hsa-miR-92b-3p	down	GLRA1	up	GLRA1	protein_coding	up	RDH10-AS1	lincRNA	up	0.892459	1	0.892459	hsa-miR-92b-3p	down	RDH10-AS1	up
hsa-miR-92b-3p	down	GLRA1	up	GLRA1	protein_coding	up	AL080317.2	lincRNA	up	0.881227	1	0.881227	hsa-miR-92b-3p	down	AL080317.2	up
hsa-miR-92b-3p	down	GLRA1	up	GLRA1	protein_coding	up	AC007938.2	lincRNA	up	0.852581	1	0.852581	hsa-miR-92b-3p	down	AC007938.2	up
hsa-miR-92b-3p	down	GLRA1	up	GLRA1	protein_coding	up	AL354733.2	lincRNA	up	0.893682	1	0.893682	hsa-miR-92b-3p	down	AL354733.2	up
hsa-miR-92b-3p	down	GLRA1	up	GLRA1	protein_coding	up	AL157938.3	lincRNA	up	0.8722	1	0.8722	hsa-miR-92b-3p	down	AL157938.3	up
hsa-miR-92b-3p	down	GLRA1	up	GLRA1	protein_coding	up	AC022540.1	lincRNA	up	0.892266	1	0.892266	hsa-miR-92b-3p	down	AC022540.1	up
hsa-miR-92b-3p	down	GLRA1	up	GLRA1	protein_coding	up	AL359094.1	lincRNA	up	0.869696	1	0.869696	hsa-miR-92b-3p	down	AL359094.1	up
hsa-miR-92b-3p	down	GLRA1	up	GLRA1	protein_coding	up	AC026401.1	lincRNA	up	0.85155	1	0.85155	hsa-miR-92b-3p	down	AC026401.1	up
hsa-miR-92b-3p	down	GLRA1	up	GLRA1	protein_coding	up	AC010401.1	lincRNA	up	0.913565	1	0.913565	hsa-miR-92b-3p	down	AC010401.1	up
hsa-miR-92b-3p	down	GLRA1	up	GLRA1	protein_coding	up	AL355613.1	lincRNA	up	0.859648	1	0.859648	hsa-miR-92b-3p	down	AL355613.1	up
hsa-miR-92b-3p	down	GLRA1	up	GLRA1	protein_coding	up	AL022097.1	lincRNA	up	0.861372	1	0.861372	hsa-miR-92b-3p	down	AL022097.1	up
hsa-miR-92b-3p	down	GLRA1	up	GLRA1	protein_coding	up	ENOX1-AS1	lincRNA	up	0.871561	1	0.871561	hsa-miR-92b-3p	down	ENOX1-AS1	up
hsa-miR-92b-3p	down	GLRA1	up	GLRA1	protein_coding	up	AP003467.1	lincRNA	up	0.876249	1	0.876249	hsa-miR-92b-3p	down	AP003467.1	up
hsa-miR-92b-3p	down	GLRA1	up	GLRA1	protein_coding	up	AC100800.1	lincRNA	up	0.893614	1	0.893614	hsa-miR-92b-3p	down	AC100800.1	up
hsa-miR-92b-3p	down	GLRA1	up	GLRA1	protein_coding	up	AP001527.1	lincRNA	up	0.869212	1	0.869212	hsa-miR-92b-3p	down	AP001527.1	up
hsa-miR-92b-3p	down	GLRA1	up	GLRA1	protein_coding	up	AC090337.1	lincRNA	up	0.902014	1	0.902014	hsa-miR-92b-3p	down	AC090337.1	up
hsa-miR-92b-3p	down	GLRA1	up	GLRA1	protein_coding	up	AC136424.2	lincRNA	up	0.883883	1	0.883883	hsa-miR-92b-3p	down	AC136424.2	up
hsa-miR-92b-3p	down	GLRA1	up	GLRA1	protein_coding	up	AC109466.1	lincRNA	up	0.854762	1	0.854762	hsa-miR-92b-3p	down	AC109466.1	up
hsa-miR-92b-3p	down	GLRA1	up	GLRA1	protein_coding	up	AC096708.2	lincRNA	up	0.911782	1	0.911782	hsa-miR-92b-3p	down	AC096708.2	up
hsa-miR-34a-5p	up	GNAO1	down	GNAO1	protein_coding	down	HAND2-AS1	lincRNA	down	0.872363	1	0.872363	hsa-miR-34a-5p	up	HAND2-AS1	down
hsa-miR-34a-5p	up	GNAO1	down	GNAO1	protein_coding	down	MBNL1-AS1	lincRNA	down	0.87718	1	0.87718	hsa-miR-34a-5p	up	MBNL1-AS1	down
hsa-miR-34a-5p	up	GNAO1	down	GNAO1	protein_coding	down	FENDRR	lincRNA	down	0.858734	1	0.858734	hsa-miR-34a-5p	up	FENDRR	down
hsa-miR-182-5p	up	GNAO1	down	GNAO1	protein_coding	down	HAND2-AS1	lincRNA	down	0.872363	1	0.872363	hsa-miR-182-5p	up	HAND2-AS1	down
hsa-miR-182-5p	up	GNAO1	down	GNAO1	protein_coding	down	FENDRR	lincRNA	down	0.858734	1	0.858734	hsa-miR-182-5p	up	FENDRR	down
hsa-miR-182-5p	up	GNAO1	down	GNAO1	protein_coding	down	AL356489.2	lincRNA	down	0.868947	1	0.868947	hsa-miR-182-5p	up	AL356489.2	down
hsa-miR-30b-5p	up	GNAO1	down	GNAO1	protein_coding	down	HAND2-AS1	lincRNA	down	0.872363	1	0.872363	hsa-miR-30b-5p	up	HAND2-AS1	down
hsa-miR-30b-5p	up	GNAO1	down	GNAO1	protein_coding	down	MBNL1-AS1	lincRNA	down	0.87718	1	0.87718	hsa-miR-30b-5p	up	MBNL1-AS1	down
hsa-miR-30b-5p	up	GNAO1	down	GNAO1	protein_coding	down	FENDRR	lincRNA	down	0.858734	1	0.858734	hsa-miR-30b-5p	up	FENDRR	down
hsa-miR-30b-5p	up	GNAO1	down	GNAO1	protein_coding	down	AF001548.1	lincRNA	down	0.882856	1	0.882856	hsa-miR-30b-5p	up	AF001548.1	down
hsa-miR-30b-5p	up	GNAO1	down	GNAO1	protein_coding	down	AL356489.2	lincRNA	down	0.868947	1	0.868947	hsa-miR-30b-5p	up	AL356489.2	down
hsa-miR-30e-5p	up	GNAO1	down	GNAO1	protein_coding	down	HAND2-AS1	lincRNA	down	0.872363	1	0.872363	hsa-miR-30e-5p	up	HAND2-AS1	down
hsa-miR-30e-5p	up	GNAO1	down	GNAO1	protein_coding	down	MBNL1-AS1	lincRNA	down	0.87718	1	0.87718	hsa-miR-30e-5p	up	MBNL1-AS1	down
hsa-miR-30e-5p	up	GNAO1	down	GNAO1	protein_coding	down	FENDRR	lincRNA	down	0.858734	1	0.858734	hsa-miR-30e-5p	up	FENDRR	down
hsa-miR-28-5p	up	GPM6A	down	GPM6A	protein_coding	down	HAND2-AS1	lincRNA	down	0.917798	1	0.917798	hsa-miR-28-5p	up	HAND2-AS1	down
hsa-miR-28-5p	up	GPM6A	down	GPM6A	protein_coding	down	MBNL1-AS1	lincRNA	down	0.880504	1	0.880504	hsa-miR-28-5p	up	MBNL1-AS1	down
hsa-miR-28-5p	up	GPM6A	down	GPM6A	protein_coding	down	MIR1-1HG-AS1	lincRNA	down	0.857453	1	0.857453	hsa-miR-28-5p	up	MIR1-1HG-AS1	down
hsa-miR-28-5p	up	GPM6A	down	GPM6A	protein_coding	down	AC010776.2	lincRNA	down	0.86388	1	0.86388	hsa-miR-28-5p	up	AC010776.2	down
hsa-miR-429	up	GPM6A	down	GPM6A	protein_coding	down	HAND2-AS1	lincRNA	down	0.917798	1	0.917798	hsa-miR-429	up	HAND2-AS1	down
hsa-miR-429	up	GPM6A	down	GPM6A	protein_coding	down	MBNL1-AS1	lincRNA	down	0.880504	1	0.880504	hsa-miR-429	up	MBNL1-AS1	down
hsa-miR-429	up	GPM6A	down	GPM6A	protein_coding	down	MIR1-1HG-AS1	lincRNA	down	0.857453	1	0.857453	hsa-miR-429	up	MIR1-1HG-AS1	down
hsa-miR-429	up	GPM6A	down	GPM6A	protein_coding	down	AL513217.1	lincRNA	down	0.859092	1	0.859092	hsa-miR-429	up	AL513217.1	down
hsa-miR-429	up	GPM6A	down	GPM6A	protein_coding	down	AC110491.1	lincRNA	down	0.855456	1	0.855456	hsa-miR-429	up	AC110491.1	down
hsa-miR-21-3p	up	GPM6A	down	GPM6A	protein_coding	down	HAND2-AS1	lincRNA	down	0.917798	1	0.917798	hsa-miR-21-3p	up	HAND2-AS1	down
hsa-miR-21-3p	up	GPM6A	down	GPM6A	protein_coding	down	MIR1-1HG-AS1	lincRNA	down	0.857453	1	0.857453	hsa-miR-21-3p	up	MIR1-1HG-AS1	down
hsa-miR-21-3p	up	GPM6A	down	GPM6A	protein_coding	down	AC011306.1	lincRNA	down	0.868086	1	0.868086	hsa-miR-21-3p	up	AC011306.1	down
hsa-miR-9-5p	up	GPR26	down	GPR26	protein_coding	down	AC092720.2	lincRNA	down	0.89324	1	0.89324	hsa-miR-9-5p	up	AC092720.2	down
hsa-miR-185-5p	up	GPR26	down	GPR26	protein_coding	down	AC092720.2	lincRNA	down	0.89324	1	0.89324	hsa-miR-185-5p	up	AC092720.2	down
hsa-miR-30b-5p	up	GRIA2	down	GRIA2	protein_coding	down	LY86-AS1	lincRNA	down	0.875817	1	0.875817	hsa-miR-30b-5p	up	LY86-AS1	down
hsa-miR-30e-5p	up	GRIA2	down	GRIA2	protein_coding	down	LY86-AS1	lincRNA	down	0.875817	1	0.875817	hsa-miR-30e-5p	up	LY86-AS1	down
hsa-miR-21-3p	up	GRIA2	down	GRIA2	protein_coding	down	LY86-AS1	lincRNA	down	0.875817	1	0.875817	hsa-miR-21-3p	up	LY86-AS1	down
hsa-miR-21-3p	up	GRIA2	down	GRIA2	protein_coding	down	AC106895.2	lincRNA	down	0.894129	1	0.894129	hsa-miR-21-3p	up	AC106895.2	down
hsa-miR-10a-5p	up	GRIK1	down	GRIK1	protein_coding	down	LINC01266	lincRNA	down	0.875988	1	0.875988	hsa-miR-10a-5p	up	LINC01266	down
hsa-miR-10a-5p	up	GRIK1	down	GRIK1	protein_coding	down	MIR133A1HG	lincRNA	down	0.93095	1	0.93095	hsa-miR-10a-5p	up	MIR133A1HG	down
hsa-miR-10b-5p	up	GRIK1	down	GRIK1	protein_coding	down	LINC01266	lincRNA	down	0.875988	1	0.875988	hsa-miR-10b-5p	up	LINC01266	down
hsa-miR-10b-5p	up	GRIK1	down	GRIK1	protein_coding	down	MIR133A1HG	lincRNA	down	0.93095	1	0.93095	hsa-miR-10b-5p	up	MIR133A1HG	down
hsa-miR-9-5p	up	GRIK3	down	GRIK3	protein_coding	down	HAND2-AS1	lincRNA	down	0.855954	1	0.855954	hsa-miR-9-5p	up	HAND2-AS1	down
hsa-miR-24-3p	up	GRIK3	down	GRIK3	protein_coding	down	HAND2-AS1	lincRNA	down	0.855954	1	0.855954	hsa-miR-24-3p	up	HAND2-AS1	down
hsa-miR-22-5p	up	GRIK5	down	GRIK5	protein_coding	down	AC009102.2	lincRNA	down	0.852973	1	0.852973	hsa-miR-22-5p	up	AC009102.2	down
hsa-miR-30d-5p	down	GRM5	up	GRM5	protein_coding	up	AC008534.1	lincRNA	up	0.863347	1	0.863347	hsa-miR-30d-5p	down	AC008534.1	up
hsa-miR-30d-5p	down	GRM5	up	GRM5	protein_coding	up	AP002518.1	lincRNA	up	0.874456	1	0.874456	hsa-miR-30d-5p	down	AP002518.1	up
hsa-miR-181a-5p	down	GRM5	up	GRM5	protein_coding	up	RAPGEF4-AS1	lincRNA	up	0.857286	1	0.857286	hsa-miR-181a-5p	down	RAPGEF4-AS1	up
hsa-miR-181b-5p	down	GRM5	up	GRM5	protein_coding	up	LINC02181	lincRNA	up	0.869021	1	0.869021	hsa-miR-181b-5p	down	LINC02181	up
hsa-miR-181b-5p	down	GRM5	up	GRM5	protein_coding	up	RAPGEF4-AS1	lincRNA	up	0.857286	1	0.857286	hsa-miR-181b-5p	down	RAPGEF4-AS1	up
hsa-miR-181b-5p	down	GRM5	up	GRM5	protein_coding	up	ENOX1-AS1	lincRNA	up	0.880448	1	0.880448	hsa-miR-181b-5p	down	ENOX1-AS1	up
hsa-miR-181b-5p	down	GRM5	up	GRM5	protein_coding	up	AC090337.1	lincRNA	up	0.853694	1	0.853694	hsa-miR-181b-5p	down	AC090337.1	up
hsa-let-7b-3p	down	GRM5	up	GRM5	protein_coding	up	RAPGEF4-AS1	lincRNA	up	0.857286	1	0.857286	hsa-let-7b-3p	down	RAPGEF4-AS1	up
hsa-let-7b-3p	down	GRM5	up	GRM5	protein_coding	up	AP001527.1	lincRNA	up	0.88462	1	0.88462	hsa-let-7b-3p	down	AP001527.1	up
hsa-miR-576-5p	up	GSG1L	down	GSG1L	protein_coding	down	LINC01532	lincRNA	down	0.865212	1	0.865212	hsa-miR-576-5p	up	LINC01532	down
hsa-miR-576-5p	up	GSG1L	down	GSG1L	protein_coding	down	LINC02554	lincRNA	down	0.879184	1	0.879184	hsa-miR-576-5p	up	LINC02554	down
hsa-miR-576-5p	up	GSG1L	down	GSG1L	protein_coding	down	PGM5P4-AS1	lincRNA	down	0.873518	1	0.873518	hsa-miR-576-5p	up	PGM5P4-AS1	down
hsa-miR-576-5p	up	GSG1L	down	GSG1L	protein_coding	down	AC026688.2	lincRNA	down	0.885702	1	0.885702	hsa-miR-576-5p	up	AC026688.2	down
hsa-miR-17-5p	up	HCN4	down	HCN4	protein_coding	down	MIR7-3HG	lincRNA	down	0.916635	1	0.916635	hsa-miR-17-5p	up	MIR7-3HG	down
hsa-miR-20a-5p	up	HCN4	down	HCN4	protein_coding	down	MIR7-3HG	lincRNA	down	0.916635	1	0.916635	hsa-miR-20a-5p	up	MIR7-3HG	down
hsa-miR-106a-5p	up	HCN4	down	HCN4	protein_coding	down	MIR7-3HG	lincRNA	down	0.916635	1	0.916635	hsa-miR-106a-5p	up	MIR7-3HG	down
hsa-miR-126-5p	up	HCN4	down	HCN4	protein_coding	down	MIR7-3HG	lincRNA	down	0.916635	1	0.916635	hsa-miR-126-5p	up	MIR7-3HG	down
hsa-miR-27a-3p	up	HCN4	down	HCN4	protein_coding	down	MIR7-3HG	lincRNA	down	0.916635	1	0.916635	hsa-miR-27a-3p	up	MIR7-3HG	down
hsa-miR-126-5p	up	HSPB8	down	HSPB8	protein_coding	down	MBNL1-AS1	lincRNA	down	0.90275	1	0.90275	hsa-miR-126-5p	up	MBNL1-AS1	down
hsa-miR-126-5p	up	HSPB8	down	HSPB8	protein_coding	down	HAND2-AS1	lincRNA	down	0.863737	1	0.863737	hsa-miR-126-5p	up	HAND2-AS1	down
hsa-miR-197-3p	down	IL1RAP	up	IL1RAP	protein_coding	up	AC034199.1	lincRNA	up	0.861309	1	0.861309	hsa-miR-197-3p	down	AC034199.1	up
hsa-miR-22-5p	up	KANK2	down	KANK2	protein_coding	down	HAND2-AS1	lincRNA	down	0.854409	1	0.854409	hsa-miR-22-5p	up	HAND2-AS1	down
hsa-miR-22-5p	up	KANK2	down	KANK2	protein_coding	down	FENDRR	lincRNA	down	0.850483	1	0.850483	hsa-miR-22-5p	up	FENDRR	down
hsa-miR-22-5p	up	KANK2	down	KANK2	protein_coding	down	AC009102.2	lincRNA	down	0.884308	1	0.884308	hsa-miR-22-5p	up	AC009102.2	down
hsa-miR-22-5p	up	KANK2	down	KANK2	protein_coding	down	AL356489.2	lincRNA	down	0.8578	1	0.8578	hsa-miR-22-5p	up	AL356489.2	down
hsa-miR-199b-5p	up	KANK2	down	KANK2	protein_coding	down	MBNL1-AS1	lincRNA	down	0.871607	1	0.871607	hsa-miR-199b-5p	up	MBNL1-AS1	down
hsa-miR-199b-5p	up	KANK2	down	KANK2	protein_coding	down	MIR1-1HG-AS1	lincRNA	down	0.856353	1	0.856353	hsa-miR-199b-5p	up	MIR1-1HG-AS1	down
hsa-miR-199b-5p	up	KANK2	down	KANK2	protein_coding	down	HAND2-AS1	lincRNA	down	0.854409	1	0.854409	hsa-miR-199b-5p	up	HAND2-AS1	down
hsa-miR-199b-5p	up	KANK2	down	KANK2	protein_coding	down	FENDRR	lincRNA	down	0.850483	1	0.850483	hsa-miR-199b-5p	up	FENDRR	down
hsa-miR-199b-5p	up	KANK2	down	KANK2	protein_coding	down	AC009102.2	lincRNA	down	0.884308	1	0.884308	hsa-miR-199b-5p	up	AC009102.2	down
hsa-miR-199b-5p	up	KANK2	down	KANK2	protein_coding	down	AL356489.2	lincRNA	down	0.8578	1	0.8578	hsa-miR-199b-5p	up	AL356489.2	down
hsa-miR-429	up	KANK2	down	KANK2	protein_coding	down	MBNL1-AS1	lincRNA	down	0.871607	1	0.871607	hsa-miR-429	up	MBNL1-AS1	down
hsa-miR-429	up	KANK2	down	KANK2	protein_coding	down	MIR1-1HG-AS1	lincRNA	down	0.856353	1	0.856353	hsa-miR-429	up	MIR1-1HG-AS1	down
hsa-miR-429	up	KANK2	down	KANK2	protein_coding	down	HAND2-AS1	lincRNA	down	0.854409	1	0.854409	hsa-miR-429	up	HAND2-AS1	down
hsa-miR-429	up	KANK2	down	KANK2	protein_coding	down	AL513217.1	lincRNA	down	0.861811	1	0.861811	hsa-miR-429	up	AL513217.1	down
hsa-miR-30b-5p	up	KCNA4	down	KCNA4	protein_coding	down	LINC01532	lincRNA	down	0.921729	1	0.921729	hsa-miR-30b-5p	up	LINC01532	down
hsa-miR-30b-5p	up	KCNA4	down	KCNA4	protein_coding	down	LINC02554	lincRNA	down	0.929778	1	0.929778	hsa-miR-30b-5p	up	LINC02554	down
hsa-miR-30b-5p	up	KCNA4	down	KCNA4	protein_coding	down	MIR137HG	lincRNA	down	0.885941	1	0.885941	hsa-miR-30b-5p	up	MIR137HG	down
hsa-miR-30b-5p	up	KCNA4	down	KCNA4	protein_coding	down	AQP4-AS1	lincRNA	down	0.94579	1	0.94579	hsa-miR-30b-5p	up	AQP4-AS1	down
hsa-miR-30b-5p	up	KCNA4	down	KCNA4	protein_coding	down	AC026688.2	lincRNA	down	0.94181	1	0.94181	hsa-miR-30b-5p	up	AC026688.2	down
hsa-miR-30b-5p	up	KCNA4	down	KCNA4	protein_coding	down	AC093390.1	lincRNA	down	0.892277	1	0.892277	hsa-miR-30b-5p	up	AC093390.1	down
hsa-miR-30e-5p	up	KCNA4	down	KCNA4	protein_coding	down	LINC02554	lincRNA	down	0.929778	1	0.929778	hsa-miR-30e-5p	up	LINC02554	down
hsa-miR-30e-5p	up	KCNA4	down	KCNA4	protein_coding	down	MIR137HG	lincRNA	down	0.885941	1	0.885941	hsa-miR-30e-5p	up	MIR137HG	down
hsa-miR-30e-5p	up	KCNA4	down	KCNA4	protein_coding	down	AC087855.2	lincRNA	down	0.850225	1	0.850225	hsa-miR-30e-5p	up	AC087855.2	down
hsa-miR-30e-5p	up	KCNA4	down	KCNA4	protein_coding	down	AQP4-AS1	lincRNA	down	0.94579	1	0.94579	hsa-miR-30e-5p	up	AQP4-AS1	down
hsa-miR-30e-5p	up	KCNA4	down	KCNA4	protein_coding	down	AC026688.2	lincRNA	down	0.94181	1	0.94181	hsa-miR-30e-5p	up	AC026688.2	down
hsa-miR-30e-5p	up	KCNA4	down	KCNA4	protein_coding	down	AC093390.1	lincRNA	down	0.892277	1	0.892277	hsa-miR-30e-5p	up	AC093390.1	down
hsa-miR-27a-3p	up	KCNA4	down	KCNA4	protein_coding	down	LINC01532	lincRNA	down	0.921729	1	0.921729	hsa-miR-27a-3p	up	LINC01532	down
hsa-miR-27a-3p	up	KCNA4	down	KCNA4	protein_coding	down	MIR137HG	lincRNA	down	0.885941	1	0.885941	hsa-miR-27a-3p	up	MIR137HG	down
hsa-miR-27a-3p	up	KCNA4	down	KCNA4	protein_coding	down	AC087855.2	lincRNA	down	0.850225	1	0.850225	hsa-miR-27a-3p	up	AC087855.2	down
hsa-miR-27a-3p	up	KCNA4	down	KCNA4	protein_coding	down	AC026688.2	lincRNA	down	0.94181	1	0.94181	hsa-miR-27a-3p	up	AC026688.2	down
hsa-miR-27a-3p	up	KCNA4	down	KCNA4	protein_coding	down	AC139099.2	lincRNA	down	0.929242	1	0.929242	hsa-miR-27a-3p	up	AC139099.2	down
hsa-miR-27a-3p	up	KCNA4	down	KCNA4	protein_coding	down	AC093390.1	lincRNA	down	0.892277	1	0.892277	hsa-miR-27a-3p	up	AC093390.1	down
hsa-miR-130a-3p	up	KCNA4	down	KCNA4	protein_coding	down	LINC01532	lincRNA	down	0.921729	1	0.921729	hsa-miR-130a-3p	up	LINC01532	down
hsa-miR-130a-3p	up	KCNA4	down	KCNA4	protein_coding	down	LINC02554	lincRNA	down	0.929778	1	0.929778	hsa-miR-130a-3p	up	LINC02554	down
hsa-miR-130a-3p	up	KCNA4	down	KCNA4	protein_coding	down	AL772337.2	lincRNA	down	0.931085	1	0.931085	hsa-miR-130a-3p	up	AL772337.2	down
hsa-miR-130a-3p	up	KCNA4	down	KCNA4	protein_coding	down	AQP4-AS1	lincRNA	down	0.94579	1	0.94579	hsa-miR-130a-3p	up	AQP4-AS1	down
hsa-miR-130a-3p	up	KCNA4	down	KCNA4	protein_coding	down	AC139099.2	lincRNA	down	0.929242	1	0.929242	hsa-miR-130a-3p	up	AC139099.2	down
hsa-miR-338-3p	up	KCNA4	down	KCNA4	protein_coding	down	LINC01532	lincRNA	down	0.921729	1	0.921729	hsa-miR-338-3p	up	LINC01532	down
hsa-miR-338-3p	up	KCNA4	down	KCNA4	protein_coding	down	LINC01907	lincRNA	down	0.921481	1	0.921481	hsa-miR-338-3p	up	LINC01907	down
hsa-miR-338-3p	up	KCNA4	down	KCNA4	protein_coding	down	LINC02554	lincRNA	down	0.929778	1	0.929778	hsa-miR-338-3p	up	LINC02554	down
hsa-miR-338-3p	up	KCNA4	down	KCNA4	protein_coding	down	MIR137HG	lincRNA	down	0.885941	1	0.885941	hsa-miR-338-3p	up	MIR137HG	down
hsa-miR-338-3p	up	KCNA4	down	KCNA4	protein_coding	down	PGM5P4-AS1	lincRNA	down	0.912435	1	0.912435	hsa-miR-338-3p	up	PGM5P4-AS1	down
hsa-miR-338-3p	up	KCNA4	down	KCNA4	protein_coding	down	GPRACR	lincRNA	down	0.894791	1	0.894791	hsa-miR-338-3p	up	GPRACR	down
hsa-miR-338-3p	up	KCNA4	down	KCNA4	protein_coding	down	AC023906.2	lincRNA	down	0.876371	1	0.876371	hsa-miR-338-3p	up	AC023906.2	down
hsa-miR-338-3p	up	KCNA4	down	KCNA4	protein_coding	down	AC007920.1	lincRNA	down	0.853141	1	0.853141	hsa-miR-338-3p	up	AC007920.1	down
hsa-miR-338-3p	up	KCNA4	down	KCNA4	protein_coding	down	AC139099.2	lincRNA	down	0.929242	1	0.929242	hsa-miR-338-3p	up	AC139099.2	down
hsa-miR-338-3p	up	KCNA4	down	KCNA4	protein_coding	down	AL445307.1	lincRNA	down	0.850975	1	0.850975	hsa-miR-338-3p	up	AL445307.1	down
hsa-miR-203b-3p	up	KCNA4	down	KCNA4	protein_coding	down	LINC01532	lincRNA	down	0.921729	1	0.921729	hsa-miR-203b-3p	up	LINC01532	down
hsa-miR-203b-3p	up	KCNA4	down	KCNA4	protein_coding	down	LINC02554	lincRNA	down	0.929778	1	0.929778	hsa-miR-203b-3p	up	LINC02554	down
hsa-miR-203b-3p	up	KCNA4	down	KCNA4	protein_coding	down	MIR137HG	lincRNA	down	0.885941	1	0.885941	hsa-miR-203b-3p	up	MIR137HG	down
hsa-miR-203b-3p	up	KCNA4	down	KCNA4	protein_coding	down	AC087855.2	lincRNA	down	0.850225	1	0.850225	hsa-miR-203b-3p	up	AC087855.2	down
hsa-miR-203b-3p	up	KCNA4	down	KCNA4	protein_coding	down	AQP4-AS1	lincRNA	down	0.94579	1	0.94579	hsa-miR-203b-3p	up	AQP4-AS1	down
hsa-miR-203b-3p	up	KCNA4	down	KCNA4	protein_coding	down	AC026688.2	lincRNA	down	0.94181	1	0.94181	hsa-miR-203b-3p	up	AC026688.2	down
hsa-miR-203b-3p	up	KCNA4	down	KCNA4	protein_coding	down	AC139099.2	lincRNA	down	0.929242	1	0.929242	hsa-miR-203b-3p	up	AC139099.2	down
hsa-miR-15a-5p	up	KCNAB1	down	KCNAB1	protein_coding	down	LINC01266	lincRNA	down	0.878021	1	0.878021	hsa-miR-15a-5p	up	LINC01266	down
hsa-miR-15a-5p	up	KCNAB1	down	KCNAB1	protein_coding	down	RBMS3-AS3	lincRNA	down	0.871107	1	0.871107	hsa-miR-15a-5p	up	RBMS3-AS3	down
hsa-miR-15a-5p	up	KCNAB1	down	KCNAB1	protein_coding	down	ADAMTS9-AS2	lincRNA	down	0.888099	1	0.888099	hsa-miR-15a-5p	up	ADAMTS9-AS2	down
hsa-miR-16-5p	up	KCNAB1	down	KCNAB1	protein_coding	down	RBMS3-AS3	lincRNA	down	0.871107	1	0.871107	hsa-miR-16-5p	up	RBMS3-AS3	down
hsa-miR-22-5p	up	KCNB1	down	KCNB1	protein_coding	down	AC009102.2	lincRNA	down	0.87555	1	0.87555	hsa-miR-22-5p	up	AC009102.2	down
hsa-let-7f-5p	up	KCNC1	down	KCNC1	protein_coding	down	GPRACR	lincRNA	down	0.864808	1	0.864808	hsa-let-7f-5p	up	GPRACR	down
hsa-miR-98-5p	up	KCNC1	down	KCNC1	protein_coding	down	GPRACR	lincRNA	down	0.864808	1	0.864808	hsa-miR-98-5p	up	GPRACR	down
hsa-let-7g-5p	up	KCNC1	down	KCNC1	protein_coding	down	LINC02554	lincRNA	down	0.855984	1	0.855984	hsa-let-7g-5p	up	LINC02554	down
hsa-miR-185-5p	up	KCNC1	down	KCNC1	protein_coding	down	LINC02554	lincRNA	down	0.855984	1	0.855984	hsa-miR-185-5p	up	LINC02554	down
hsa-miR-185-5p	up	KCNC1	down	KCNC1	protein_coding	down	GPRACR	lincRNA	down	0.864808	1	0.864808	hsa-miR-185-5p	up	GPRACR	down
hsa-miR-143-3p	up	KCNC1	down	KCNC1	protein_coding	down	LINC02554	lincRNA	down	0.855984	1	0.855984	hsa-miR-143-3p	up	LINC02554	down
hsa-miR-576-5p	up	KCNMA1	down	KCNMA1	protein_coding	down	HAND2-AS1	lincRNA	down	0.851608	1	0.851608	hsa-miR-576-5p	up	HAND2-AS1	down
hsa-miR-576-5p	up	KCNMA1	down	KCNMA1	protein_coding	down	FENDRR	lincRNA	down	0.864481	1	0.864481	hsa-miR-576-5p	up	FENDRR	down
hsa-miR-576-5p	up	KCNMA1	down	KCNMA1	protein_coding	down	AC009102.2	lincRNA	down	0.878625	1	0.878625	hsa-miR-576-5p	up	AC009102.2	down
hsa-miR-576-5p	up	KCNMA1	down	KCNMA1	protein_coding	down	AL356489.2	lincRNA	down	0.902259	1	0.902259	hsa-miR-576-5p	up	AL356489.2	down
hsa-miR-17-3p	up	KCNMA1	down	KCNMA1	protein_coding	down	MBNL1-AS1	lincRNA	down	0.914532	1	0.914532	hsa-miR-17-3p	up	MBNL1-AS1	down
hsa-miR-17-3p	up	KCNMA1	down	KCNMA1	protein_coding	down	HAND2-AS1	lincRNA	down	0.851608	1	0.851608	hsa-miR-17-3p	up	HAND2-AS1	down
hsa-miR-17-3p	up	KCNMA1	down	KCNMA1	protein_coding	down	AC036108.3	lincRNA	down	0.855118	1	0.855118	hsa-miR-17-3p	up	AC036108.3	down
hsa-miR-17-3p	up	KCNMA1	down	KCNMA1	protein_coding	down	FENDRR	lincRNA	down	0.864481	1	0.864481	hsa-miR-17-3p	up	FENDRR	down
hsa-miR-17-3p	up	KCNMA1	down	KCNMA1	protein_coding	down	AC009102.2	lincRNA	down	0.878625	1	0.878625	hsa-miR-17-3p	up	AC009102.2	down
hsa-miR-338-3p	up	KCNMA1	down	KCNMA1	protein_coding	down	MBNL1-AS1	lincRNA	down	0.914532	1	0.914532	hsa-miR-338-3p	up	MBNL1-AS1	down
hsa-miR-338-3p	up	KCNMA1	down	KCNMA1	protein_coding	down	HAND2-AS1	lincRNA	down	0.851608	1	0.851608	hsa-miR-338-3p	up	HAND2-AS1	down
hsa-miR-338-3p	up	KCNMA1	down	KCNMA1	protein_coding	down	AC036108.3	lincRNA	down	0.855118	1	0.855118	hsa-miR-338-3p	up	AC036108.3	down
hsa-miR-338-3p	up	KCNMA1	down	KCNMA1	protein_coding	down	FENDRR	lincRNA	down	0.864481	1	0.864481	hsa-miR-338-3p	up	FENDRR	down
hsa-miR-338-3p	up	KCNMA1	down	KCNMA1	protein_coding	down	AL513217.1	lincRNA	down	0.882683	1	0.882683	hsa-miR-338-3p	up	AL513217.1	down
hsa-miR-338-3p	up	KCNMA1	down	KCNMA1	protein_coding	down	AC009102.2	lincRNA	down	0.878625	1	0.878625	hsa-miR-338-3p	up	AC009102.2	down
hsa-miR-101-3p	up	KCNN3	down	KCNN3	protein_coding	down	MBNL1-AS1	lincRNA	down	0.853868	1	0.853868	hsa-miR-101-3p	up	MBNL1-AS1	down
hsa-miR-27a-3p	up	KCNN3	down	KCNN3	protein_coding	down	MBNL1-AS1	lincRNA	down	0.853868	1	0.853868	hsa-miR-27a-3p	up	MBNL1-AS1	down
hsa-miR-27a-3p	up	KCTD4	down	KCTD4	protein_coding	down	LINC01266	lincRNA	down	0.86853	1	0.86853	hsa-miR-27a-3p	up	LINC01266	down
hsa-miR-27a-3p	up	KCTD4	down	KCTD4	protein_coding	down	MIR133A1HG	lincRNA	down	0.948439	1	0.948439	hsa-miR-27a-3p	up	MIR133A1HG	down
hsa-miR-744-3p	up	KCTD4	down	KCTD4	protein_coding	down	LINC01266	lincRNA	down	0.86853	1	0.86853	hsa-miR-744-3p	up	LINC01266	down
hsa-miR-744-3p	up	KCTD4	down	KCTD4	protein_coding	down	MIR133A1HG	lincRNA	down	0.948439	1	0.948439	hsa-miR-744-3p	up	MIR133A1HG	down
hsa-miR-141-3p	up	KIAA0408	down	KIAA0408	protein_coding	down	ADAMTS9-AS2	lincRNA	down	0.851088	1	0.851088	hsa-miR-141-3p	up	ADAMTS9-AS2	down
hsa-miR-200a-3p	up	KIAA0408	down	KIAA0408	protein_coding	down	ADAMTS9-AS2	lincRNA	down	0.851088	1	0.851088	hsa-miR-200a-3p	up	ADAMTS9-AS2	down
hsa-miR-9-5p	up	KLHL1	down	KLHL1	protein_coding	down	MLIP-AS1	lincRNA	down	0.878148	1	0.878148	hsa-miR-9-5p	up	MLIP-AS1	down
hsa-miR-24-3p	up	KLHL1	down	KLHL1	protein_coding	down	LINC02599	lincRNA	down	0.851891	1	0.851891	hsa-miR-24-3p	up	LINC02599	down
hsa-miR-24-3p	up	KLHL1	down	KLHL1	protein_coding	down	PTCHD1-AS	lincRNA	down	0.872215	1	0.872215	hsa-miR-24-3p	up	PTCHD1-AS	down
hsa-miR-24-3p	up	KLHL1	down	KLHL1	protein_coding	down	AC106895.2	lincRNA	down	0.854712	1	0.854712	hsa-miR-24-3p	up	AC106895.2	down
hsa-let-7g-3p	up	LDB3	down	LDB3	protein_coding	down	AC009102.2	lincRNA	down	0.861404	1	0.861404	hsa-let-7g-3p	up	AC009102.2	down
hsa-let-7g-3p	up	LDB3	down	LDB3	protein_coding	down	AC002398.2	lincRNA	down	0.907174	1	0.907174	hsa-let-7g-3p	up	AC002398.2	down
hsa-miR-17-5p	up	LMO3	down	LMO3	protein_coding	down	MBNL1-AS1	lincRNA	down	0.900668	1	0.900668	hsa-miR-17-5p	up	MBNL1-AS1	down
hsa-miR-17-5p	up	LMO3	down	LMO3	protein_coding	down	AL356489.2	lincRNA	down	0.852451	1	0.852451	hsa-miR-17-5p	up	AL356489.2	down
hsa-miR-20a-5p	up	LMO3	down	LMO3	protein_coding	down	MBNL1-AS1	lincRNA	down	0.900668	1	0.900668	hsa-miR-20a-5p	up	MBNL1-AS1	down
hsa-miR-20a-5p	up	LMO3	down	LMO3	protein_coding	down	AL356489.2	lincRNA	down	0.852451	1	0.852451	hsa-miR-20a-5p	up	AL356489.2	down
hsa-miR-106a-5p	up	LMO3	down	LMO3	protein_coding	down	MBNL1-AS1	lincRNA	down	0.900668	1	0.900668	hsa-miR-106a-5p	up	MBNL1-AS1	down
hsa-miR-106a-5p	up	LMO3	down	LMO3	protein_coding	down	AL356489.2	lincRNA	down	0.852451	1	0.852451	hsa-miR-106a-5p	up	AL356489.2	down
hsa-miR-183-5p	up	LMO3	down	LMO3	protein_coding	down	MBNL1-AS1	lincRNA	down	0.900668	1	0.900668	hsa-miR-183-5p	up	MBNL1-AS1	down
hsa-miR-106b-5p	up	LMO3	down	LMO3	protein_coding	down	MBNL1-AS1	lincRNA	down	0.900668	1	0.900668	hsa-miR-106b-5p	up	MBNL1-AS1	down
hsa-miR-106b-5p	up	LMO3	down	LMO3	protein_coding	down	AL356489.2	lincRNA	down	0.852451	1	0.852451	hsa-miR-106b-5p	up	AL356489.2	down
hsa-miR-141-3p	up	LMO3	down	LMO3	protein_coding	down	MBNL1-AS1	lincRNA	down	0.900668	1	0.900668	hsa-miR-141-3p	up	MBNL1-AS1	down
hsa-miR-200a-3p	up	LMO3	down	LMO3	protein_coding	down	MBNL1-AS1	lincRNA	down	0.900668	1	0.900668	hsa-miR-200a-3p	up	MBNL1-AS1	down
hsa-miR-338-3p	up	LMO3	down	LMO3	protein_coding	down	MBNL1-AS1	lincRNA	down	0.900668	1	0.900668	hsa-miR-338-3p	up	MBNL1-AS1	down
hsa-miR-338-3p	up	LMO3	down	LMO3	protein_coding	down	AC036108.3	lincRNA	down	0.86561	1	0.86561	hsa-miR-338-3p	up	AC036108.3	down
hsa-miR-182-5p	up	LONRF2	down	LONRF2	protein_coding	down	HAND2-AS1	lincRNA	down	0.863798	1	0.863798	hsa-miR-182-5p	up	HAND2-AS1	down
hsa-miR-182-5p	up	LONRF2	down	LONRF2	protein_coding	down	AL356489.2	lincRNA	down	0.851053	1	0.851053	hsa-miR-182-5p	up	AL356489.2	down
hsa-miR-182-5p	up	LONRF2	down	LONRF2	protein_coding	down	AC110491.1	lincRNA	down	0.882908	1	0.882908	hsa-miR-182-5p	up	AC110491.1	down
hsa-miR-576-5p	up	LONRF2	down	LONRF2	protein_coding	down	HAND2-AS1	lincRNA	down	0.863798	1	0.863798	hsa-miR-576-5p	up	HAND2-AS1	down
hsa-miR-576-5p	up	LONRF2	down	LONRF2	protein_coding	down	AC009102.2	lincRNA	down	0.861778	1	0.861778	hsa-miR-576-5p	up	AC009102.2	down
hsa-miR-576-5p	up	LONRF2	down	LONRF2	protein_coding	down	AL356489.2	lincRNA	down	0.851053	1	0.851053	hsa-miR-576-5p	up	AL356489.2	down
hsa-miR-576-5p	up	LONRF2	down	LONRF2	protein_coding	down	AC110491.1	lincRNA	down	0.882908	1	0.882908	hsa-miR-576-5p	up	AC110491.1	down
hsa-miR-27a-3p	up	LONRF2	down	LONRF2	protein_coding	down	MBNL1-AS1	lincRNA	down	0.853588	1	0.853588	hsa-miR-27a-3p	up	MBNL1-AS1	down
hsa-miR-27a-3p	up	LONRF2	down	LONRF2	protein_coding	down	HAND2-AS1	lincRNA	down	0.863798	1	0.863798	hsa-miR-27a-3p	up	HAND2-AS1	down
hsa-miR-27a-3p	up	LONRF2	down	LONRF2	protein_coding	down	AC110491.1	lincRNA	down	0.882908	1	0.882908	hsa-miR-27a-3p	up	AC110491.1	down
hsa-miR-26a-5p	up	LPP	down	LPP	protein_coding	down	ADAMTS9-AS2	lincRNA	down	0.872608	1	0.872608	hsa-miR-26a-5p	up	ADAMTS9-AS2	down
hsa-miR-26b-5p	up	LPP	down	LPP	protein_coding	down	ADAMTS9-AS2	lincRNA	down	0.872608	1	0.872608	hsa-miR-26b-5p	up	ADAMTS9-AS2	down
hsa-miR-182-5p	up	LPP	down	LPP	protein_coding	down	RBMS3-AS3	lincRNA	down	0.852549	1	0.852549	hsa-miR-182-5p	up	RBMS3-AS3	down
hsa-miR-182-5p	up	LPP	down	LPP	protein_coding	down	ADAMTS9-AS2	lincRNA	down	0.872608	1	0.872608	hsa-miR-182-5p	up	ADAMTS9-AS2	down
hsa-miR-224-5p	up	LPP	down	LPP	protein_coding	down	RBMS3-AS3	lincRNA	down	0.852549	1	0.852549	hsa-miR-224-5p	up	RBMS3-AS3	down
hsa-miR-224-5p	up	LPP	down	LPP	protein_coding	down	ADAMTS9-AS2	lincRNA	down	0.872608	1	0.872608	hsa-miR-224-5p	up	ADAMTS9-AS2	down
hsa-miR-30b-5p	up	LPP	down	LPP	protein_coding	down	RBMS3-AS3	lincRNA	down	0.852549	1	0.852549	hsa-miR-30b-5p	up	RBMS3-AS3	down
hsa-miR-9-5p	up	LPP	down	LPP	protein_coding	down	ADAMTS9-AS2	lincRNA	down	0.872608	1	0.872608	hsa-miR-9-5p	up	ADAMTS9-AS2	down
hsa-miR-9-5p	up	LPP	down	LPP	protein_coding	down	AC110813.1	lincRNA	down	0.88497	1	0.88497	hsa-miR-9-5p	up	AC110813.1	down
hsa-miR-126-5p	up	LPP	down	LPP	protein_coding	down	RBMS3-AS3	lincRNA	down	0.852549	1	0.852549	hsa-miR-126-5p	up	RBMS3-AS3	down
hsa-miR-126-5p	up	LPP	down	LPP	protein_coding	down	ADAMTS9-AS2	lincRNA	down	0.872608	1	0.872608	hsa-miR-126-5p	up	ADAMTS9-AS2	down
hsa-miR-576-5p	up	LPP	down	LPP	protein_coding	down	RBMS3-AS3	lincRNA	down	0.852549	1	0.852549	hsa-miR-576-5p	up	RBMS3-AS3	down
hsa-miR-576-5p	up	LPP	down	LPP	protein_coding	down	ADAMTS9-AS2	lincRNA	down	0.872608	1	0.872608	hsa-miR-576-5p	up	ADAMTS9-AS2	down
hsa-miR-576-5p	up	LPP	down	LPP	protein_coding	down	AC110813.1	lincRNA	down	0.88497	1	0.88497	hsa-miR-576-5p	up	AC110813.1	down
hsa-miR-22-3p	up	LPP	down	LPP	protein_coding	down	ADAMTS9-AS2	lincRNA	down	0.872608	1	0.872608	hsa-miR-22-3p	up	ADAMTS9-AS2	down
hsa-miR-141-3p	up	LPP	down	LPP	protein_coding	down	ADAMTS9-AS2	lincRNA	down	0.872608	1	0.872608	hsa-miR-141-3p	up	ADAMTS9-AS2	down
hsa-miR-200a-3p	up	LPP	down	LPP	protein_coding	down	ADAMTS9-AS2	lincRNA	down	0.872608	1	0.872608	hsa-miR-200a-3p	up	ADAMTS9-AS2	down
hsa-miR-335-3p	up	LPP	down	LPP	protein_coding	down	RBMS3-AS3	lincRNA	down	0.852549	1	0.852549	hsa-miR-335-3p	up	RBMS3-AS3	down
hsa-miR-335-3p	up	LPP	down	LPP	protein_coding	down	ADAMTS9-AS2	lincRNA	down	0.872608	1	0.872608	hsa-miR-335-3p	up	ADAMTS9-AS2	down
hsa-miR-335-3p	up	LPP	down	LPP	protein_coding	down	AC011472.4	lincRNA	down	0.894277	1	0.894277	hsa-miR-335-3p	up	AC011472.4	down
hsa-miR-335-3p	up	LPP	down	LPP	protein_coding	down	AC110813.1	lincRNA	down	0.88497	1	0.88497	hsa-miR-335-3p	up	AC110813.1	down
hsa-miR-452-5p	up	MAB21L2	down	MAB21L2	protein_coding	down	MBNL1-AS1	lincRNA	down	0.910788	1	0.910788	hsa-miR-452-5p	up	MBNL1-AS1	down
hsa-miR-452-5p	up	MAB21L2	down	MAB21L2	protein_coding	down	HAND2-AS1	lincRNA	down	0.905475	1	0.905475	hsa-miR-452-5p	up	HAND2-AS1	down
hsa-miR-452-5p	up	MAB21L2	down	MAB21L2	protein_coding	down	FENDRR	lincRNA	down	0.853213	1	0.853213	hsa-miR-452-5p	up	FENDRR	down
hsa-miR-452-5p	up	MAB21L2	down	MAB21L2	protein_coding	down	AL356489.2	lincRNA	down	0.87823	1	0.87823	hsa-miR-452-5p	up	AL356489.2	down
hsa-miR-429	up	MAMDC2	down	MAMDC2	protein_coding	down	HAND2-AS1	lincRNA	down	0.862248	1	0.862248	hsa-miR-429	up	HAND2-AS1	down
hsa-miR-30b-5p	up	MAP6	down	MAP6	protein_coding	down	ZNF667-AS1	lincRNA	down	0.870633	1	0.870633	hsa-miR-30b-5p	up	ZNF667-AS1	down
hsa-miR-17-5p	up	MAPK4	down	MAPK4	protein_coding	down	MBNL1-AS1	lincRNA	down	0.857253	1	0.857253	hsa-miR-17-5p	up	MBNL1-AS1	down
hsa-miR-17-5p	up	MAPK4	down	MAPK4	protein_coding	down	MIR1-1HG-AS1	lincRNA	down	0.854373	1	0.854373	hsa-miR-17-5p	up	MIR1-1HG-AS1	down
hsa-miR-17-5p	up	MAPK4	down	MAPK4	protein_coding	down	HAND2-AS1	lincRNA	down	0.880563	1	0.880563	hsa-miR-17-5p	up	HAND2-AS1	down
hsa-miR-17-5p	up	MAPK4	down	MAPK4	protein_coding	down	AL356489.2	lincRNA	down	0.855977	1	0.855977	hsa-miR-17-5p	up	AL356489.2	down
hsa-miR-20a-5p	up	MAPK4	down	MAPK4	protein_coding	down	MBNL1-AS1	lincRNA	down	0.857253	1	0.857253	hsa-miR-20a-5p	up	MBNL1-AS1	down
hsa-miR-20a-5p	up	MAPK4	down	MAPK4	protein_coding	down	MIR1-1HG-AS1	lincRNA	down	0.854373	1	0.854373	hsa-miR-20a-5p	up	MIR1-1HG-AS1	down
hsa-miR-20a-5p	up	MAPK4	down	MAPK4	protein_coding	down	HAND2-AS1	lincRNA	down	0.880563	1	0.880563	hsa-miR-20a-5p	up	HAND2-AS1	down
hsa-miR-20a-5p	up	MAPK4	down	MAPK4	protein_coding	down	AC009102.2	lincRNA	down	0.87309	1	0.87309	hsa-miR-20a-5p	up	AC009102.2	down
hsa-miR-20a-5p	up	MAPK4	down	MAPK4	protein_coding	down	AL356489.2	lincRNA	down	0.855977	1	0.855977	hsa-miR-20a-5p	up	AL356489.2	down
hsa-miR-106a-5p	up	MAPK4	down	MAPK4	protein_coding	down	MBNL1-AS1	lincRNA	down	0.857253	1	0.857253	hsa-miR-106a-5p	up	MBNL1-AS1	down
hsa-miR-106a-5p	up	MAPK4	down	MAPK4	protein_coding	down	MIR1-1HG-AS1	lincRNA	down	0.854373	1	0.854373	hsa-miR-106a-5p	up	MIR1-1HG-AS1	down
hsa-miR-106a-5p	up	MAPK4	down	MAPK4	protein_coding	down	HAND2-AS1	lincRNA	down	0.880563	1	0.880563	hsa-miR-106a-5p	up	HAND2-AS1	down
hsa-miR-106a-5p	up	MAPK4	down	MAPK4	protein_coding	down	AL356489.2	lincRNA	down	0.855977	1	0.855977	hsa-miR-106a-5p	up	AL356489.2	down
hsa-miR-183-5p	up	MAPK4	down	MAPK4	protein_coding	down	MBNL1-AS1	lincRNA	down	0.857253	1	0.857253	hsa-miR-183-5p	up	MBNL1-AS1	down
hsa-miR-183-5p	up	MAPK4	down	MAPK4	protein_coding	down	MIR1-1HG-AS1	lincRNA	down	0.854373	1	0.854373	hsa-miR-183-5p	up	MIR1-1HG-AS1	down
hsa-miR-183-5p	up	MAPK4	down	MAPK4	protein_coding	down	HAND2-AS1	lincRNA	down	0.880563	1	0.880563	hsa-miR-183-5p	up	HAND2-AS1	down
hsa-miR-106b-5p	up	MAPK4	down	MAPK4	protein_coding	down	MBNL1-AS1	lincRNA	down	0.857253	1	0.857253	hsa-miR-106b-5p	up	MBNL1-AS1	down
hsa-miR-106b-5p	up	MAPK4	down	MAPK4	protein_coding	down	MIR1-1HG-AS1	lincRNA	down	0.854373	1	0.854373	hsa-miR-106b-5p	up	MIR1-1HG-AS1	down
hsa-miR-106b-5p	up	MAPK4	down	MAPK4	protein_coding	down	HAND2-AS1	lincRNA	down	0.880563	1	0.880563	hsa-miR-106b-5p	up	HAND2-AS1	down
hsa-miR-106b-5p	up	MAPK4	down	MAPK4	protein_coding	down	AC009102.2	lincRNA	down	0.87309	1	0.87309	hsa-miR-106b-5p	up	AC009102.2	down
hsa-miR-106b-5p	up	MAPK4	down	MAPK4	protein_coding	down	AL356489.2	lincRNA	down	0.855977	1	0.855977	hsa-miR-106b-5p	up	AL356489.2	down
hsa-miR-28-5p	up	MASP1	down	MASP1	protein_coding	down	AC010776.2	lincRNA	down	0.85566	1	0.85566	hsa-miR-28-5p	up	AC010776.2	down
hsa-miR-126-5p	up	MCHR2	down	MCHR2	protein_coding	down	TRDN-AS1	lincRNA	down	0.91012	1	0.91012	hsa-miR-126-5p	up	TRDN-AS1	down
hsa-miR-126-5p	up	MCHR2	down	MCHR2	protein_coding	down	AC046195.1	lincRNA	down	0.863861	1	0.863861	hsa-miR-126-5p	up	AC046195.1	down
hsa-miR-126-5p	up	MCHR2	down	MCHR2	protein_coding	down	AL021395.1	lincRNA	down	0.88223	1	0.88223	hsa-miR-126-5p	up	AL021395.1	down
hsa-let-7b-3p	down	MMS22L	up	MMS22L	protein_coding	up	SMAD5-AS1	lincRNA	up	0.858672	1	0.858672	hsa-let-7b-3p	down	SMAD5-AS1	up
hsa-let-7b-3p	down	MMS22L	up	MMS22L	protein_coding	up	AC131971.1	lincRNA	up	0.878295	1	0.878295	hsa-let-7b-3p	down	AC131971.1	up
hsa-let-7b-3p	down	MMS22L	up	MMS22L	protein_coding	up	AC130650.2	lincRNA	up	0.885034	1	0.885034	hsa-let-7b-3p	down	AC130650.2	up
hsa-miR-576-5p	up	MORC1	down	MORC1	protein_coding	down	TRDN-AS1	lincRNA	down	0.892485	1	0.892485	hsa-miR-576-5p	up	TRDN-AS1	down
hsa-miR-576-5p	up	MORC1	down	MORC1	protein_coding	down	AL110292.1	lincRNA	down	0.855838	1	0.855838	hsa-miR-576-5p	up	AL110292.1	down
hsa-miR-335-3p	up	MSRB3	down	MSRB3	protein_coding	down	ZNF667-AS1	lincRNA	down	0.89487	1	0.89487	hsa-miR-335-3p	up	ZNF667-AS1	down
hsa-miR-335-3p	up	MSRB3	down	MSRB3	protein_coding	down	MBNL1-AS1	lincRNA	down	0.924959	1	0.924959	hsa-miR-335-3p	up	MBNL1-AS1	down
hsa-miR-335-3p	up	MSRB3	down	MSRB3	protein_coding	down	AC036108.3	lincRNA	down	0.860632	1	0.860632	hsa-miR-335-3p	up	AC036108.3	down
hsa-miR-335-3p	up	MSRB3	down	MSRB3	protein_coding	down	AL356489.2	lincRNA	down	0.868903	1	0.868903	hsa-miR-335-3p	up	AL356489.2	down
hsa-miR-30b-5p	up	MYH11	down	MYH11	protein_coding	down	MBNL1-AS1	lincRNA	down	0.881719	1	0.881719	hsa-miR-30b-5p	up	MBNL1-AS1	down
hsa-miR-30b-5p	up	MYH11	down	MYH11	protein_coding	down	HAND2-AS1	lincRNA	down	0.859594	1	0.859594	hsa-miR-30b-5p	up	HAND2-AS1	down
hsa-miR-30b-5p	up	MYH11	down	MYH11	protein_coding	down	AF001548.1	lincRNA	down	0.904531	1	0.904531	hsa-miR-30b-5p	up	AF001548.1	down
hsa-miR-30e-5p	up	MYH11	down	MYH11	protein_coding	down	MBNL1-AS1	lincRNA	down	0.881719	1	0.881719	hsa-miR-30e-5p	up	MBNL1-AS1	down
hsa-miR-30e-5p	up	MYH11	down	MYH11	protein_coding	down	HAND2-AS1	lincRNA	down	0.859594	1	0.859594	hsa-miR-30e-5p	up	HAND2-AS1	down
hsa-miR-15a-5p	up	MYLK	down	MYLK	protein_coding	down	MBNL1-AS1	lincRNA	down	0.933731	1	0.933731	hsa-miR-15a-5p	up	MBNL1-AS1	down
hsa-miR-15a-5p	up	MYLK	down	MYLK	protein_coding	down	HAND2-AS1	lincRNA	down	0.851796	1	0.851796	hsa-miR-15a-5p	up	HAND2-AS1	down
hsa-miR-16-5p	up	MYLK	down	MYLK	protein_coding	down	MBNL1-AS1	lincRNA	down	0.933731	1	0.933731	hsa-miR-16-5p	up	MBNL1-AS1	down
hsa-miR-16-5p	up	MYLK	down	MYLK	protein_coding	down	HAND2-AS1	lincRNA	down	0.851796	1	0.851796	hsa-miR-16-5p	up	HAND2-AS1	down
hsa-miR-16-5p	up	MYLK	down	MYLK	protein_coding	down	AC079313.2	lincRNA	down	0.884914	1	0.884914	hsa-miR-16-5p	up	AC079313.2	down
hsa-miR-374b-5p	up	MYLK	down	MYLK	protein_coding	down	MBNL1-AS1	lincRNA	down	0.933731	1	0.933731	hsa-miR-374b-5p	up	MBNL1-AS1	down
hsa-miR-374b-5p	up	MYLK	down	MYLK	protein_coding	down	HAND2-AS1	lincRNA	down	0.851796	1	0.851796	hsa-miR-374b-5p	up	HAND2-AS1	down
hsa-miR-374b-5p	up	MYLK	down	MYLK	protein_coding	down	AF001548.1	lincRNA	down	0.891328	1	0.891328	hsa-miR-374b-5p	up	AF001548.1	down
hsa-miR-374b-5p	up	MYLK	down	MYLK	protein_coding	down	AL356489.2	lincRNA	down	0.879429	1	0.879429	hsa-miR-374b-5p	up	AL356489.2	down
hsa-miR-142-3p	up	MYLK	down	MYLK	protein_coding	down	MBNL1-AS1	lincRNA	down	0.933731	1	0.933731	hsa-miR-142-3p	up	MBNL1-AS1	down
hsa-miR-142-3p	up	MYLK	down	MYLK	protein_coding	down	HAND2-AS1	lincRNA	down	0.851796	1	0.851796	hsa-miR-142-3p	up	HAND2-AS1	down
hsa-miR-142-3p	up	MYLK	down	MYLK	protein_coding	down	AL356489.2	lincRNA	down	0.879429	1	0.879429	hsa-miR-142-3p	up	AL356489.2	down
hsa-miR-9-5p	up	MYOCD	down	MYOCD	protein_coding	down	MBNL1-AS1	lincRNA	down	0.878253	1	0.878253	hsa-miR-9-5p	up	MBNL1-AS1	down
hsa-miR-9-5p	up	MYOCD	down	MYOCD	protein_coding	down	HAND2-AS1	lincRNA	down	0.867581	1	0.867581	hsa-miR-9-5p	up	HAND2-AS1	down
hsa-miR-9-5p	up	MYOCD	down	MYOCD	protein_coding	down	FENDRR	lincRNA	down	0.882415	1	0.882415	hsa-miR-9-5p	up	FENDRR	down
hsa-miR-9-5p	up	MYOCD	down	MYOCD	protein_coding	down	AC009102.2	lincRNA	down	0.912485	1	0.912485	hsa-miR-9-5p	up	AC009102.2	down
hsa-miR-27a-3p	up	MYOCD	down	MYOCD	protein_coding	down	MBNL1-AS1	lincRNA	down	0.878253	1	0.878253	hsa-miR-27a-3p	up	MBNL1-AS1	down
hsa-miR-27a-3p	up	MYOCD	down	MYOCD	protein_coding	down	HAND2-AS1	lincRNA	down	0.867581	1	0.867581	hsa-miR-27a-3p	up	HAND2-AS1	down
hsa-miR-27a-3p	up	MYOCD	down	MYOCD	protein_coding	down	FENDRR	lincRNA	down	0.882415	1	0.882415	hsa-miR-27a-3p	up	FENDRR	down
hsa-miR-27a-3p	up	MYOCD	down	MYOCD	protein_coding	down	AC110491.1	lincRNA	down	0.870967	1	0.870967	hsa-miR-27a-3p	up	AC110491.1	down
hsa-miR-576-5p	up	MYT1L	down	MYT1L	protein_coding	down	AC092720.2	lincRNA	down	0.889747	1	0.889747	hsa-miR-576-5p	up	AC092720.2	down
hsa-miR-30b-5p	up	NAP1L3	down	NAP1L3	protein_coding	down	ZNF667-AS1	lincRNA	down	0.8813	1	0.8813	hsa-miR-30b-5p	up	ZNF667-AS1	down
hsa-miR-130a-3p	up	NAP1L3	down	NAP1L3	protein_coding	down	ZNF667-AS1	lincRNA	down	0.8813	1	0.8813	hsa-miR-130a-3p	up	ZNF667-AS1	down
hsa-miR-24-3p	up	NCAN	down	NCAN	protein_coding	down	LINC01976	lincRNA	down	0.899286	1	0.899286	hsa-miR-24-3p	up	LINC01976	down
hsa-miR-203b-3p	up	NCAN	down	NCAN	protein_coding	down	LINC02078	lincRNA	down	0.885946	1	0.885946	hsa-miR-203b-3p	up	LINC02078	down
hsa-miR-203b-3p	up	NCAN	down	NCAN	protein_coding	down	MIR7-3HG	lincRNA	down	0.953566	1	0.953566	hsa-miR-203b-3p	up	MIR7-3HG	down
hsa-miR-576-5p	up	NECAB1	down	NECAB1	protein_coding	down	AL356489.2	lincRNA	down	0.869136	1	0.869136	hsa-miR-576-5p	up	AL356489.2	down
hsa-miR-141-3p	up	NECAB1	down	NECAB1	protein_coding	down	MBNL1-AS1	lincRNA	down	0.897967	1	0.897967	hsa-miR-141-3p	up	MBNL1-AS1	down
hsa-miR-200a-3p	up	NECAB1	down	NECAB1	protein_coding	down	MBNL1-AS1	lincRNA	down	0.897967	1	0.897967	hsa-miR-200a-3p	up	MBNL1-AS1	down
hsa-miR-335-3p	up	NECAB1	down	NECAB1	protein_coding	down	MBNL1-AS1	lincRNA	down	0.897967	1	0.897967	hsa-miR-335-3p	up	MBNL1-AS1	down
hsa-miR-335-3p	up	NECAB1	down	NECAB1	protein_coding	down	AC036108.3	lincRNA	down	0.898613	1	0.898613	hsa-miR-335-3p	up	AC036108.3	down
hsa-miR-335-3p	up	NECAB1	down	NECAB1	protein_coding	down	AL356489.2	lincRNA	down	0.869136	1	0.869136	hsa-miR-335-3p	up	AL356489.2	down
hsa-miR-335-3p	up	NECAB1	down	NECAB1	protein_coding	down	LINC01829	lincRNA	down	0.874358	1	0.874358	hsa-miR-335-3p	up	LINC01829	down
hsa-miR-30b-5p	up	NEGR1	down	NEGR1	protein_coding	down	ZNF667-AS1	lincRNA	down	0.853261	1	0.853261	hsa-miR-30b-5p	up	ZNF667-AS1	down
hsa-miR-30b-5p	up	NEGR1	down	NEGR1	protein_coding	down	MBNL1-AS1	lincRNA	down	0.892013	1	0.892013	hsa-miR-30b-5p	up	MBNL1-AS1	down
hsa-miR-30b-5p	up	NEGR1	down	NEGR1	protein_coding	down	HAND2-AS1	lincRNA	down	0.87507	1	0.87507	hsa-miR-30b-5p	up	HAND2-AS1	down
hsa-miR-30b-5p	up	NEGR1	down	NEGR1	protein_coding	down	FENDRR	lincRNA	down	0.875995	1	0.875995	hsa-miR-30b-5p	up	FENDRR	down
hsa-miR-30b-5p	up	NEGR1	down	NEGR1	protein_coding	down	AL356489.2	lincRNA	down	0.869011	1	0.869011	hsa-miR-30b-5p	up	AL356489.2	down
hsa-miR-126-5p	up	NEGR1	down	NEGR1	protein_coding	down	ZNF667-AS1	lincRNA	down	0.853261	1	0.853261	hsa-miR-126-5p	up	ZNF667-AS1	down
hsa-miR-126-5p	up	NEGR1	down	NEGR1	protein_coding	down	MIR497HG	lincRNA	down	0.871257	1	0.871257	hsa-miR-126-5p	up	MIR497HG	down
hsa-miR-126-5p	up	NEGR1	down	NEGR1	protein_coding	down	MBNL1-AS1	lincRNA	down	0.892013	1	0.892013	hsa-miR-126-5p	up	MBNL1-AS1	down
hsa-miR-126-5p	up	NEGR1	down	NEGR1	protein_coding	down	HAND2-AS1	lincRNA	down	0.87507	1	0.87507	hsa-miR-126-5p	up	HAND2-AS1	down
hsa-miR-126-5p	up	NEGR1	down	NEGR1	protein_coding	down	FENDRR	lincRNA	down	0.875995	1	0.875995	hsa-miR-126-5p	up	FENDRR	down
hsa-miR-30e-5p	up	NEGR1	down	NEGR1	protein_coding	down	MBNL1-AS1	lincRNA	down	0.892013	1	0.892013	hsa-miR-30e-5p	up	MBNL1-AS1	down
hsa-miR-30e-5p	up	NEGR1	down	NEGR1	protein_coding	down	HAND2-AS1	lincRNA	down	0.87507	1	0.87507	hsa-miR-30e-5p	up	HAND2-AS1	down
hsa-miR-30e-5p	up	NEGR1	down	NEGR1	protein_coding	down	FENDRR	lincRNA	down	0.875995	1	0.875995	hsa-miR-30e-5p	up	FENDRR	down
hsa-miR-429	up	NEGR1	down	NEGR1	protein_coding	down	ZNF667-AS1	lincRNA	down	0.853261	1	0.853261	hsa-miR-429	up	ZNF667-AS1	down
hsa-miR-429	up	NEGR1	down	NEGR1	protein_coding	down	MBNL1-AS1	lincRNA	down	0.892013	1	0.892013	hsa-miR-429	up	MBNL1-AS1	down
hsa-miR-429	up	NEGR1	down	NEGR1	protein_coding	down	HAND2-AS1	lincRNA	down	0.87507	1	0.87507	hsa-miR-429	up	HAND2-AS1	down
hsa-miR-429	up	NEGR1	down	NEGR1	protein_coding	down	AC036108.3	lincRNA	down	0.876614	1	0.876614	hsa-miR-429	up	AC036108.3	down
hsa-miR-576-5p	up	NEGR1	down	NEGR1	protein_coding	down	HAND2-AS1	lincRNA	down	0.87507	1	0.87507	hsa-miR-576-5p	up	HAND2-AS1	down
hsa-miR-576-5p	up	NEGR1	down	NEGR1	protein_coding	down	FENDRR	lincRNA	down	0.875995	1	0.875995	hsa-miR-576-5p	up	FENDRR	down
hsa-miR-576-5p	up	NEGR1	down	NEGR1	protein_coding	down	AL356489.2	lincRNA	down	0.869011	1	0.869011	hsa-miR-576-5p	up	AL356489.2	down
hsa-miR-29b-3p	up	NEGR1	down	NEGR1	protein_coding	down	MIR497HG	lincRNA	down	0.871257	1	0.871257	hsa-miR-29b-3p	up	MIR497HG	down
hsa-miR-29b-3p	up	NEGR1	down	NEGR1	protein_coding	down	MBNL1-AS1	lincRNA	down	0.892013	1	0.892013	hsa-miR-29b-3p	up	MBNL1-AS1	down
hsa-miR-29b-3p	up	NEGR1	down	NEGR1	protein_coding	down	HAND2-AS1	lincRNA	down	0.87507	1	0.87507	hsa-miR-29b-3p	up	HAND2-AS1	down
hsa-miR-29b-3p	up	NEGR1	down	NEGR1	protein_coding	down	FENDRR	lincRNA	down	0.875995	1	0.875995	hsa-miR-29b-3p	up	FENDRR	down
hsa-let-7g-3p	up	NEGR1	down	NEGR1	protein_coding	down	ZNF667-AS1	lincRNA	down	0.853261	1	0.853261	hsa-let-7g-3p	up	ZNF667-AS1	down
hsa-let-7g-3p	up	NEGR1	down	NEGR1	protein_coding	down	HAND2-AS1	lincRNA	down	0.87507	1	0.87507	hsa-let-7g-3p	up	HAND2-AS1	down
hsa-miR-29c-3p	up	NEGR1	down	NEGR1	protein_coding	down	MIR497HG	lincRNA	down	0.871257	1	0.871257	hsa-miR-29c-3p	up	MIR497HG	down
hsa-miR-29c-3p	up	NEGR1	down	NEGR1	protein_coding	down	MBNL1-AS1	lincRNA	down	0.892013	1	0.892013	hsa-miR-29c-3p	up	MBNL1-AS1	down
hsa-miR-29c-3p	up	NEGR1	down	NEGR1	protein_coding	down	HAND2-AS1	lincRNA	down	0.87507	1	0.87507	hsa-miR-29c-3p	up	HAND2-AS1	down
hsa-miR-29c-3p	up	NEGR1	down	NEGR1	protein_coding	down	FENDRR	lincRNA	down	0.875995	1	0.875995	hsa-miR-29c-3p	up	FENDRR	down
hsa-miR-576-5p	up	NEUROD1	down	NEUROD1	protein_coding	down	LINC02078	lincRNA	down	0.859581	1	0.859581	hsa-miR-576-5p	up	LINC02078	down
hsa-miR-148a-3p	up	NEUROD1	down	NEUROD1	protein_coding	down	MIR7-3HG	lincRNA	down	0.970901	1	0.970901	hsa-miR-148a-3p	up	MIR7-3HG	down
hsa-miR-130a-3p	up	NEUROD1	down	NEUROD1	protein_coding	down	LINC02078	lincRNA	down	0.859581	1	0.859581	hsa-miR-130a-3p	up	LINC02078	down
hsa-miR-152-3p	up	NEUROD1	down	NEUROD1	protein_coding	down	MIR7-3HG	lincRNA	down	0.970901	1	0.970901	hsa-miR-152-3p	up	MIR7-3HG	down
hsa-miR-17-3p	up	NLGN1	down	NLGN1	protein_coding	down	MBNL1-AS1	lincRNA	down	0.871622	1	0.871622	hsa-miR-17-3p	up	MBNL1-AS1	down
hsa-miR-17-3p	up	NLGN1	down	NLGN1	protein_coding	down	AC036108.3	lincRNA	down	0.857901	1	0.857901	hsa-miR-17-3p	up	AC036108.3	down
hsa-miR-182-5p	up	NPTX1	down	NPTX1	protein_coding	down	HAND2-AS1	lincRNA	down	0.88638	1	0.88638	hsa-miR-182-5p	up	HAND2-AS1	down
hsa-miR-9-5p	up	NPTX1	down	NPTX1	protein_coding	down	HAND2-AS1	lincRNA	down	0.88638	1	0.88638	hsa-miR-9-5p	up	HAND2-AS1	down
hsa-miR-9-5p	up	NPTX1	down	NPTX1	protein_coding	down	AC009102.2	lincRNA	down	0.87567	1	0.87567	hsa-miR-9-5p	up	AC009102.2	down
hsa-miR-101-3p	up	NPTX1	down	NPTX1	protein_coding	down	HAND2-AS1	lincRNA	down	0.88638	1	0.88638	hsa-miR-101-3p	up	HAND2-AS1	down
hsa-miR-429	up	NPTX1	down	NPTX1	protein_coding	down	HAND2-AS1	lincRNA	down	0.88638	1	0.88638	hsa-miR-429	up	HAND2-AS1	down
hsa-miR-148a-3p	up	NPTX1	down	NPTX1	protein_coding	down	HAND2-AS1	lincRNA	down	0.88638	1	0.88638	hsa-miR-148a-3p	up	HAND2-AS1	down
hsa-miR-148a-3p	up	NPTX1	down	NPTX1	protein_coding	down	AC009102.2	lincRNA	down	0.87567	1	0.87567	hsa-miR-148a-3p	up	AC009102.2	down
hsa-let-7g-3p	up	NPTX1	down	NPTX1	protein_coding	down	HAND2-AS1	lincRNA	down	0.88638	1	0.88638	hsa-let-7g-3p	up	HAND2-AS1	down
hsa-let-7g-3p	up	NPTX1	down	NPTX1	protein_coding	down	AC009102.2	lincRNA	down	0.87567	1	0.87567	hsa-let-7g-3p	up	AC009102.2	down
hsa-miR-130a-3p	up	NPTX1	down	NPTX1	protein_coding	down	HAND2-AS1	lincRNA	down	0.88638	1	0.88638	hsa-miR-130a-3p	up	HAND2-AS1	down
hsa-miR-130a-3p	up	NPTX1	down	NPTX1	protein_coding	down	AC009102.2	lincRNA	down	0.87567	1	0.87567	hsa-miR-130a-3p	up	AC009102.2	down
hsa-miR-152-3p	up	NPTX1	down	NPTX1	protein_coding	down	HAND2-AS1	lincRNA	down	0.88638	1	0.88638	hsa-miR-152-3p	up	HAND2-AS1	down
hsa-miR-152-3p	up	NPTX1	down	NPTX1	protein_coding	down	AC009102.2	lincRNA	down	0.87567	1	0.87567	hsa-miR-152-3p	up	AC009102.2	down
hsa-miR-30b-5p	up	NRG3	down	NRG3	protein_coding	down	MIR137HG	lincRNA	down	0.850841	1	0.850841	hsa-miR-30b-5p	up	MIR137HG	down
hsa-miR-30b-5p	up	NRG3	down	NRG3	protein_coding	down	AQP4-AS1	lincRNA	down	0.851494	1	0.851494	hsa-miR-30b-5p	up	AQP4-AS1	down
hsa-miR-30b-5p	up	NRG3	down	NRG3	protein_coding	down	AC026688.2	lincRNA	down	0.865732	1	0.865732	hsa-miR-30b-5p	up	AC026688.2	down
hsa-miR-30b-5p	up	NRG3	down	NRG3	protein_coding	down	AC093390.1	lincRNA	down	0.856524	1	0.856524	hsa-miR-30b-5p	up	AC093390.1	down
hsa-miR-30e-5p	up	NRG3	down	NRG3	protein_coding	down	MIR137HG	lincRNA	down	0.850841	1	0.850841	hsa-miR-30e-5p	up	MIR137HG	down
hsa-miR-30e-5p	up	NRG3	down	NRG3	protein_coding	down	AQP4-AS1	lincRNA	down	0.851494	1	0.851494	hsa-miR-30e-5p	up	AQP4-AS1	down
hsa-miR-30e-5p	up	NRG3	down	NRG3	protein_coding	down	AC026688.2	lincRNA	down	0.865732	1	0.865732	hsa-miR-30e-5p	up	AC026688.2	down
hsa-miR-30e-5p	up	NRG3	down	NRG3	protein_coding	down	AC093390.1	lincRNA	down	0.856524	1	0.856524	hsa-miR-30e-5p	up	AC093390.1	down
hsa-miR-203b-3p	up	NRG3	down	NRG3	protein_coding	down	MIR137HG	lincRNA	down	0.850841	1	0.850841	hsa-miR-203b-3p	up	MIR137HG	down
hsa-miR-203b-3p	up	NRG3	down	NRG3	protein_coding	down	AQP4-AS1	lincRNA	down	0.851494	1	0.851494	hsa-miR-203b-3p	up	AQP4-AS1	down
hsa-miR-203b-3p	up	NRG3	down	NRG3	protein_coding	down	AC026688.2	lincRNA	down	0.865732	1	0.865732	hsa-miR-203b-3p	up	AC026688.2	down
hsa-miR-330-5p	down	OTP	up	OTP	protein_coding	up	AC016705.1	lincRNA	up	0.867936	1	0.867936	hsa-miR-330-5p	down	AC016705.1	up
hsa-miR-330-5p	down	OTP	up	OTP	protein_coding	up	AC004835.1	lincRNA	up	0.862779	1	0.862779	hsa-miR-330-5p	down	AC004835.1	up
hsa-miR-330-5p	down	OTP	up	OTP	protein_coding	up	AP002784.1	lincRNA	up	0.850073	1	0.850073	hsa-miR-330-5p	down	AP002784.1	up
hsa-miR-330-5p	down	OTP	up	OTP	protein_coding	up	AL117328.2	lincRNA	up	0.851234	1	0.851234	hsa-miR-330-5p	down	AL117328.2	up
hsa-miR-330-5p	down	OTP	up	OTP	protein_coding	up	LINC01391	lincRNA	up	0.864947	1	0.864947	hsa-miR-330-5p	down	LINC01391	up
hsa-miR-330-5p	down	OTP	up	OTP	protein_coding	up	AP004147.1	lincRNA	up	0.872632	1	0.872632	hsa-miR-330-5p	down	AP004147.1	up
hsa-miR-330-5p	down	OTP	up	OTP	protein_coding	up	AC073934.1	lincRNA	up	0.855745	1	0.855745	hsa-miR-330-5p	down	AC073934.1	up
hsa-miR-330-5p	down	OTP	up	OTP	protein_coding	up	AL008638.6	lincRNA	up	0.883303	1	0.883303	hsa-miR-330-5p	down	AL008638.6	up
hsa-miR-330-5p	down	OTP	up	OTP	protein_coding	up	LINC02547	lincRNA	up	0.857231	1	0.857231	hsa-miR-330-5p	down	LINC02547	up
hsa-miR-182-5p	up	PALLD	down	PALLD	protein_coding	down	ZNF667-AS1	lincRNA	down	0.866035	1	0.866035	hsa-miR-182-5p	up	ZNF667-AS1	down
hsa-miR-29b-2-5p	down	PALM2	up	PALM2	protein_coding	up	PAPPA-AS2	lincRNA	up	0.924009	1	0.924009	hsa-miR-29b-2-5p	down	PAPPA-AS2	up
hsa-miR-29b-2-5p	down	PALM2	up	PALM2	protein_coding	up	PKIA-AS1	lincRNA	up	0.887288	1	0.887288	hsa-miR-29b-2-5p	down	PKIA-AS1	up
hsa-miR-29b-2-5p	down	PALM2	up	PALM2	protein_coding	up	PLCG1-AS1	lincRNA	up	0.899463	1	0.899463	hsa-miR-29b-2-5p	down	PLCG1-AS1	up
hsa-miR-29b-2-5p	down	PALM2	up	PALM2	protein_coding	up	TEX41	lincRNA	up	0.937483	1	0.937483	hsa-miR-29b-2-5p	down	TEX41	up
hsa-miR-29b-2-5p	down	PALM2	up	PALM2	protein_coding	up	WASF3-AS1	lincRNA	up	0.903083	1	0.903083	hsa-miR-29b-2-5p	down	WASF3-AS1	up
hsa-miR-29b-2-5p	down	PALM2	up	PALM2	protein_coding	up	Z97200.1	lincRNA	up	0.911773	1	0.911773	hsa-miR-29b-2-5p	down	Z97200.1	up
hsa-miR-29b-2-5p	down	PALM2	up	PALM2	protein_coding	up	Z99289.2	lincRNA	up	0.87573	1	0.87573	hsa-miR-29b-2-5p	down	Z99289.2	up
hsa-miR-29b-2-5p	down	PALM2	up	PALM2	protein_coding	up	LUCAT1	lincRNA	up	0.856556	1	0.856556	hsa-miR-29b-2-5p	down	LUCAT1	up
hsa-miR-29b-2-5p	down	PALM2	up	PALM2	protein_coding	up	HMGA2-AS1	lincRNA	up	0.926552	1	0.926552	hsa-miR-29b-2-5p	down	HMGA2-AS1	up
hsa-miR-29b-2-5p	down	PALM2	up	PALM2	protein_coding	up	CD44-AS1	lincRNA	up	0.862032	1	0.862032	hsa-miR-29b-2-5p	down	CD44-AS1	up
hsa-miR-29b-2-5p	down	PALM2	up	PALM2	protein_coding	up	INHBA-AS1	lincRNA	up	0.917679	1	0.917679	hsa-miR-29b-2-5p	down	INHBA-AS1	up
hsa-miR-29b-2-5p	down	PALM2	up	PALM2	protein_coding	up	LINC01429	lincRNA	up	0.864108	1	0.864108	hsa-miR-29b-2-5p	down	LINC01429	up
hsa-miR-29b-2-5p	down	PALM2	up	PALM2	protein_coding	up	AL080317.2	lincRNA	up	0.893396	1	0.893396	hsa-miR-29b-2-5p	down	AL080317.2	up
hsa-miR-29b-2-5p	down	PALM2	up	PALM2	protein_coding	up	AP002907.1	lincRNA	up	0.85757	1	0.85757	hsa-miR-29b-2-5p	down	AP002907.1	up
hsa-miR-29b-2-5p	down	PALM2	up	PALM2	protein_coding	up	AL031770.1	lincRNA	up	0.875922	1	0.875922	hsa-miR-29b-2-5p	down	AL031770.1	up
hsa-miR-29b-2-5p	down	PALM2	up	PALM2	protein_coding	up	AC004466.3	lincRNA	up	0.889608	1	0.889608	hsa-miR-29b-2-5p	down	AC004466.3	up
hsa-miR-29b-2-5p	down	PALM2	up	PALM2	protein_coding	up	AC003986.2	lincRNA	up	0.884971	1	0.884971	hsa-miR-29b-2-5p	down	AC003986.2	up
hsa-miR-29b-2-5p	down	PALM2	up	PALM2	protein_coding	up	AC006460.1	lincRNA	up	0.948265	1	0.948265	hsa-miR-29b-2-5p	down	AC006460.1	up
hsa-miR-29b-2-5p	down	PALM2	up	PALM2	protein_coding	up	LINC00624	lincRNA	up	0.862723	1	0.862723	hsa-miR-29b-2-5p	down	LINC00624	up
hsa-miR-29b-2-5p	down	PALM2	up	PALM2	protein_coding	up	LINC02656	lincRNA	up	0.855287	1	0.855287	hsa-miR-29b-2-5p	down	LINC02656	up
hsa-miR-29b-2-5p	down	PALM2	up	PALM2	protein_coding	up	AC022540.1	lincRNA	up	0.923387	1	0.923387	hsa-miR-29b-2-5p	down	AC022540.1	up
hsa-miR-29b-2-5p	down	PALM2	up	PALM2	protein_coding	up	AC010401.1	lincRNA	up	0.934521	1	0.934521	hsa-miR-29b-2-5p	down	AC010401.1	up
hsa-miR-29b-2-5p	down	PALM2	up	PALM2	protein_coding	up	AC007731.3	lincRNA	up	0.872576	1	0.872576	hsa-miR-29b-2-5p	down	AC007731.3	up
hsa-miR-29b-2-5p	down	PALM2	up	PALM2	protein_coding	up	AL445248.1	lincRNA	up	0.903906	1	0.903906	hsa-miR-29b-2-5p	down	AL445248.1	up
hsa-miR-29b-2-5p	down	PALM2	up	PALM2	protein_coding	up	AC092794.2	lincRNA	up	0.859717	1	0.859717	hsa-miR-29b-2-5p	down	AC092794.2	up
hsa-miR-29b-2-5p	down	PALM2	up	PALM2	protein_coding	up	AC002064.2	lincRNA	up	0.887767	1	0.887767	hsa-miR-29b-2-5p	down	AC002064.2	up
hsa-miR-29b-2-5p	down	PALM2	up	PALM2	protein_coding	up	AC009563.1	lincRNA	up	0.851204	1	0.851204	hsa-miR-29b-2-5p	down	AC009563.1	up
hsa-miR-29b-2-5p	down	PALM2	up	PALM2	protein_coding	up	AP003696.1	lincRNA	up	0.932445	1	0.932445	hsa-miR-29b-2-5p	down	AP003696.1	up
hsa-miR-29b-2-5p	down	PALM2	up	PALM2	protein_coding	up	AC011595.1	lincRNA	up	0.905593	1	0.905593	hsa-miR-29b-2-5p	down	AC011595.1	up
hsa-miR-29b-2-5p	down	PALM2	up	PALM2	protein_coding	up	AC021739.4	lincRNA	up	0.946207	1	0.946207	hsa-miR-29b-2-5p	down	AC021739.4	up
hsa-miR-29b-2-5p	down	PALM2	up	PALM2	protein_coding	up	AC027228.1	lincRNA	up	0.892142	1	0.892142	hsa-miR-29b-2-5p	down	AC027228.1	up
hsa-miR-29b-2-5p	down	PALM2	up	PALM2	protein_coding	up	AC110792.2	lincRNA	up	0.879408	1	0.879408	hsa-miR-29b-2-5p	down	AC110792.2	up
hsa-miR-29b-2-5p	down	PALM2	up	PALM2	protein_coding	up	AL360091.3	lincRNA	up	0.94106	1	0.94106	hsa-miR-29b-2-5p	down	AL360091.3	up
hsa-miR-29b-2-5p	down	PALM2	up	PALM2	protein_coding	up	AP000487.2	lincRNA	up	0.928349	1	0.928349	hsa-miR-29b-2-5p	down	AP000487.2	up
hsa-miR-29b-2-5p	down	PALM2	up	PALM2	protein_coding	up	AC055764.1	lincRNA	up	0.863486	1	0.863486	hsa-miR-29b-2-5p	down	AC055764.1	up
hsa-miR-29b-2-5p	down	PALM2	up	PALM2	protein_coding	up	IGF2BP2-AS1	lincRNA	up	0.870891	1	0.870891	hsa-miR-29b-2-5p	down	IGF2BP2-AS1	up
hsa-miR-29b-2-5p	down	PALM2	up	PALM2	protein_coding	up	LINC01338	lincRNA	up	0.885266	1	0.885266	hsa-miR-29b-2-5p	down	LINC01338	up
hsa-miR-29b-2-5p	down	PALM2	up	PALM2	protein_coding	up	COL5A1-AS1	lincRNA	up	0.920177	1	0.920177	hsa-miR-29b-2-5p	down	COL5A1-AS1	up
hsa-miR-29b-2-5p	down	PALM2	up	PALM2	protein_coding	up	AC009542.1	lincRNA	up	0.929778	1	0.929778	hsa-miR-29b-2-5p	down	AC009542.1	up
hsa-miR-29b-2-5p	down	PALM2	up	PALM2	protein_coding	up	AC027808.1	lincRNA	up	0.895251	1	0.895251	hsa-miR-29b-2-5p	down	AC027808.1	up
hsa-miR-29b-2-5p	down	PALM2	up	PALM2	protein_coding	up	MEG8	lincRNA	up	0.899223	1	0.899223	hsa-miR-29b-2-5p	down	MEG8	up
hsa-miR-29b-2-5p	down	PALM2	up	PALM2	protein_coding	up	AC026894.1	lincRNA	up	0.886871	1	0.886871	hsa-miR-29b-2-5p	down	AC026894.1	up
hsa-miR-29b-2-5p	down	PALM2	up	PALM2	protein_coding	up	AC087286.1	lincRNA	up	0.876537	1	0.876537	hsa-miR-29b-2-5p	down	AC087286.1	up
hsa-miR-29b-2-5p	down	PALM2	up	PALM2	protein_coding	up	MTOR-AS1	lincRNA	up	0.870793	1	0.870793	hsa-miR-29b-2-5p	down	MTOR-AS1	up
hsa-miR-29b-2-5p	down	PALM2	up	PALM2	protein_coding	up	AL022329.1	lincRNA	up	0.907184	1	0.907184	hsa-miR-29b-2-5p	down	AL022329.1	up
hsa-miR-29b-2-5p	down	PALM2	up	PALM2	protein_coding	up	AC103739.2	lincRNA	up	0.885044	1	0.885044	hsa-miR-29b-2-5p	down	AC103739.2	up
hsa-miR-29b-2-5p	down	PALM2	up	PALM2	protein_coding	up	AC018462.1	lincRNA	up	0.872573	1	0.872573	hsa-miR-29b-2-5p	down	AC018462.1	up
hsa-miR-29b-2-5p	down	PALM2	up	PALM2	protein_coding	up	AC072022.1	lincRNA	up	0.919261	1	0.919261	hsa-miR-29b-2-5p	down	AC072022.1	up
hsa-miR-29b-2-5p	down	PALM2	up	PALM2	protein_coding	up	AC008534.1	lincRNA	up	0.937552	1	0.937552	hsa-miR-29b-2-5p	down	AC008534.1	up
hsa-miR-29b-2-5p	down	PALM2	up	PALM2	protein_coding	up	AP002518.1	lincRNA	up	0.969064	1	0.969064	hsa-miR-29b-2-5p	down	AP002518.1	up
hsa-miR-29b-2-5p	down	PALM2	up	PALM2	protein_coding	up	AC100800.1	lincRNA	up	0.927539	1	0.927539	hsa-miR-29b-2-5p	down	AC100800.1	up
hsa-miR-29b-2-5p	down	PALM2	up	PALM2	protein_coding	up	AC016866.2	lincRNA	up	0.904147	1	0.904147	hsa-miR-29b-2-5p	down	AC016866.2	up
hsa-miR-29b-2-5p	down	PALM2	up	PALM2	protein_coding	up	KCNMA1-AS3	lincRNA	up	0.962235	1	0.962235	hsa-miR-29b-2-5p	down	KCNMA1-AS3	up
hsa-miR-29b-2-5p	down	PALM2	up	PALM2	protein_coding	up	LIPC-AS1	lincRNA	up	0.913632	1	0.913632	hsa-miR-29b-2-5p	down	LIPC-AS1	up
hsa-miR-29b-2-5p	down	PALM2	up	PALM2	protein_coding	up	MYLK-AS2	lincRNA	up	0.912551	1	0.912551	hsa-miR-29b-2-5p	down	MYLK-AS2	up
hsa-miR-29b-2-5p	down	PALM2	up	PALM2	protein_coding	up	AL359693.1	lincRNA	up	0.889188	1	0.889188	hsa-miR-29b-2-5p	down	AL359693.1	up
hsa-miR-30d-5p	down	PALM2	up	PALM2	protein_coding	up	PKIA-AS1	lincRNA	up	0.887288	1	0.887288	hsa-miR-30d-5p	down	PKIA-AS1	up
hsa-miR-30d-5p	down	PALM2	up	PALM2	protein_coding	up	PLCG1-AS1	lincRNA	up	0.899463	1	0.899463	hsa-miR-30d-5p	down	PLCG1-AS1	up
hsa-miR-30d-5p	down	PALM2	up	PALM2	protein_coding	up	PRICKLE2-AS3	lincRNA	up	0.94003	1	0.94003	hsa-miR-30d-5p	down	PRICKLE2-AS3	up
hsa-miR-30d-5p	down	PALM2	up	PALM2	protein_coding	up	PRKG1-AS1	lincRNA	up	0.889422	1	0.889422	hsa-miR-30d-5p	down	PRKG1-AS1	up
hsa-miR-30d-5p	down	PALM2	up	PALM2	protein_coding	up	RDH10-AS1	lincRNA	up	0.92698	1	0.92698	hsa-miR-30d-5p	down	RDH10-AS1	up
hsa-miR-30d-5p	down	PALM2	up	PALM2	protein_coding	up	TEX41	lincRNA	up	0.937483	1	0.937483	hsa-miR-30d-5p	down	TEX41	up
hsa-miR-30d-5p	down	PALM2	up	PALM2	protein_coding	up	LUCAT1	lincRNA	up	0.856556	1	0.856556	hsa-miR-30d-5p	down	LUCAT1	up
hsa-miR-30d-5p	down	PALM2	up	PALM2	protein_coding	up	HMGA2-AS1	lincRNA	up	0.926552	1	0.926552	hsa-miR-30d-5p	down	HMGA2-AS1	up
hsa-miR-30d-5p	down	PALM2	up	PALM2	protein_coding	up	LINC01429	lincRNA	up	0.864108	1	0.864108	hsa-miR-30d-5p	down	LINC01429	up
hsa-miR-30d-5p	down	PALM2	up	PALM2	protein_coding	up	LINC00862	lincRNA	up	0.928279	1	0.928279	hsa-miR-30d-5p	down	LINC00862	up
hsa-miR-30d-5p	down	PALM2	up	PALM2	protein_coding	up	AC243772.2	lincRNA	up	0.881823	1	0.881823	hsa-miR-30d-5p	down	AC243772.2	up
hsa-miR-30d-5p	down	PALM2	up	PALM2	protein_coding	up	AC006460.1	lincRNA	up	0.948265	1	0.948265	hsa-miR-30d-5p	down	AC006460.1	up
hsa-miR-30d-5p	down	PALM2	up	PALM2	protein_coding	up	LINC02656	lincRNA	up	0.855287	1	0.855287	hsa-miR-30d-5p	down	LINC02656	up
hsa-miR-30d-5p	down	PALM2	up	PALM2	protein_coding	up	FO680682.1	lincRNA	up	0.882298	1	0.882298	hsa-miR-30d-5p	down	FO680682.1	up
hsa-miR-30d-5p	down	PALM2	up	PALM2	protein_coding	up	AC010285.1	lincRNA	up	0.866917	1	0.866917	hsa-miR-30d-5p	down	AC010285.1	up
hsa-miR-30d-5p	down	PALM2	up	PALM2	protein_coding	up	DOCK4-AS1	lincRNA	up	0.868917	1	0.868917	hsa-miR-30d-5p	down	DOCK4-AS1	up
hsa-miR-30d-5p	down	PALM2	up	PALM2	protein_coding	up	AC002064.1	lincRNA	up	0.851348	1	0.851348	hsa-miR-30d-5p	down	AC002064.1	up
hsa-miR-30d-5p	down	PALM2	up	PALM2	protein_coding	up	IGF2BP2-AS1	lincRNA	up	0.870891	1	0.870891	hsa-miR-30d-5p	down	IGF2BP2-AS1	up
hsa-miR-30d-5p	down	PALM2	up	PALM2	protein_coding	up	MEG8	lincRNA	up	0.899223	1	0.899223	hsa-miR-30d-5p	down	MEG8	up
hsa-miR-30d-5p	down	PALM2	up	PALM2	protein_coding	up	AC008534.1	lincRNA	up	0.937552	1	0.937552	hsa-miR-30d-5p	down	AC008534.1	up
hsa-miR-30d-5p	down	PALM2	up	PALM2	protein_coding	up	AP002518.1	lincRNA	up	0.969064	1	0.969064	hsa-miR-30d-5p	down	AP002518.1	up
hsa-miR-30d-5p	down	PALM2	up	PALM2	protein_coding	up	AC026782.2	lincRNA	up	0.923805	1	0.923805	hsa-miR-30d-5p	down	AC026782.2	up
hsa-miR-30d-5p	down	PALM2	up	PALM2	protein_coding	up	LIPC-AS1	lincRNA	up	0.913632	1	0.913632	hsa-miR-30d-5p	down	LIPC-AS1	up
hsa-miR-181a-5p	down	PALM2	up	PALM2	protein_coding	up	PKIA-AS1	lincRNA	up	0.887288	1	0.887288	hsa-miR-181a-5p	down	PKIA-AS1	up
hsa-miR-181a-5p	down	PALM2	up	PALM2	protein_coding	up	RAPGEF4-AS1	lincRNA	up	0.863487	1	0.863487	hsa-miR-181a-5p	down	RAPGEF4-AS1	up
hsa-miR-181a-5p	down	PALM2	up	PALM2	protein_coding	up	RDH10-AS1	lincRNA	up	0.92698	1	0.92698	hsa-miR-181a-5p	down	RDH10-AS1	up
hsa-miR-181a-5p	down	PALM2	up	PALM2	protein_coding	up	TEX41	lincRNA	up	0.937483	1	0.937483	hsa-miR-181a-5p	down	TEX41	up
hsa-miR-181a-5p	down	PALM2	up	PALM2	protein_coding	up	Z97200.1	lincRNA	up	0.911773	1	0.911773	hsa-miR-181a-5p	down	Z97200.1	up
hsa-miR-181a-5p	down	PALM2	up	PALM2	protein_coding	up	LUCAT1	lincRNA	up	0.856556	1	0.856556	hsa-miR-181a-5p	down	LUCAT1	up
hsa-miR-181a-5p	down	PALM2	up	PALM2	protein_coding	up	HMGA2-AS1	lincRNA	up	0.926552	1	0.926552	hsa-miR-181a-5p	down	HMGA2-AS1	up
hsa-miR-181a-5p	down	PALM2	up	PALM2	protein_coding	up	ARNTL2-AS1	lincRNA	up	0.920075	1	0.920075	hsa-miR-181a-5p	down	ARNTL2-AS1	up
hsa-miR-181a-5p	down	PALM2	up	PALM2	protein_coding	up	LINC00862	lincRNA	up	0.928279	1	0.928279	hsa-miR-181a-5p	down	LINC00862	up
hsa-miR-181a-5p	down	PALM2	up	PALM2	protein_coding	up	AC004466.3	lincRNA	up	0.889608	1	0.889608	hsa-miR-181a-5p	down	AC004466.3	up
hsa-miR-181a-5p	down	PALM2	up	PALM2	protein_coding	up	AC003986.2	lincRNA	up	0.884971	1	0.884971	hsa-miR-181a-5p	down	AC003986.2	up
hsa-miR-181a-5p	down	PALM2	up	PALM2	protein_coding	up	AC006460.1	lincRNA	up	0.948265	1	0.948265	hsa-miR-181a-5p	down	AC006460.1	up
hsa-miR-181a-5p	down	PALM2	up	PALM2	protein_coding	up	LINC00624	lincRNA	up	0.862723	1	0.862723	hsa-miR-181a-5p	down	LINC00624	up
hsa-miR-181a-5p	down	PALM2	up	PALM2	protein_coding	up	LINC02656	lincRNA	up	0.855287	1	0.855287	hsa-miR-181a-5p	down	LINC02656	up
hsa-miR-181a-5p	down	PALM2	up	PALM2	protein_coding	up	AC022973.3	lincRNA	up	0.954616	1	0.954616	hsa-miR-181a-5p	down	AC022973.3	up
hsa-miR-181a-5p	down	PALM2	up	PALM2	protein_coding	up	IGF2BP2-AS1	lincRNA	up	0.870891	1	0.870891	hsa-miR-181a-5p	down	IGF2BP2-AS1	up
hsa-miR-181a-5p	down	PALM2	up	PALM2	protein_coding	up	MEG8	lincRNA	up	0.899223	1	0.899223	hsa-miR-181a-5p	down	MEG8	up
hsa-miR-181a-5p	down	PALM2	up	PALM2	protein_coding	up	AC087286.2	lincRNA	up	0.851451	1	0.851451	hsa-miR-181a-5p	down	AC087286.2	up
hsa-miR-181a-5p	down	PALM2	up	PALM2	protein_coding	up	LPP-AS1	lincRNA	up	0.889151	1	0.889151	hsa-miR-181a-5p	down	LPP-AS1	up
hsa-miR-181a-5p	down	PALM2	up	PALM2	protein_coding	up	AC100800.1	lincRNA	up	0.927539	1	0.927539	hsa-miR-181a-5p	down	AC100800.1	up
hsa-miR-181a-5p	down	PALM2	up	PALM2	protein_coding	up	LINC01796	lincRNA	up	0.872067	1	0.872067	hsa-miR-181a-5p	down	LINC01796	up
hsa-miR-181a-5p	down	PALM2	up	PALM2	protein_coding	up	AC019270.1	lincRNA	up	0.862349	1	0.862349	hsa-miR-181a-5p	down	AC019270.1	up
hsa-miR-181a-5p	down	PALM2	up	PALM2	protein_coding	up	AL359693.1	lincRNA	up	0.889188	1	0.889188	hsa-miR-181a-5p	down	AL359693.1	up
hsa-miR-181b-5p	down	PALM2	up	PALM2	protein_coding	up	PKIA-AS1	lincRNA	up	0.887288	1	0.887288	hsa-miR-181b-5p	down	PKIA-AS1	up
hsa-miR-181b-5p	down	PALM2	up	PALM2	protein_coding	up	PRKG1-AS1	lincRNA	up	0.889422	1	0.889422	hsa-miR-181b-5p	down	PRKG1-AS1	up
hsa-miR-181b-5p	down	PALM2	up	PALM2	protein_coding	up	RAPGEF4-AS1	lincRNA	up	0.863487	1	0.863487	hsa-miR-181b-5p	down	RAPGEF4-AS1	up
hsa-miR-181b-5p	down	PALM2	up	PALM2	protein_coding	up	RDH10-AS1	lincRNA	up	0.92698	1	0.92698	hsa-miR-181b-5p	down	RDH10-AS1	up
hsa-miR-181b-5p	down	PALM2	up	PALM2	protein_coding	up	TEX41	lincRNA	up	0.937483	1	0.937483	hsa-miR-181b-5p	down	TEX41	up
hsa-miR-181b-5p	down	PALM2	up	PALM2	protein_coding	up	Z97200.1	lincRNA	up	0.911773	1	0.911773	hsa-miR-181b-5p	down	Z97200.1	up
hsa-miR-181b-5p	down	PALM2	up	PALM2	protein_coding	up	ZMYM4-AS1	lincRNA	up	0.872952	1	0.872952	hsa-miR-181b-5p	down	ZMYM4-AS1	up
hsa-miR-181b-5p	down	PALM2	up	PALM2	protein_coding	up	LUCAT1	lincRNA	up	0.856556	1	0.856556	hsa-miR-181b-5p	down	LUCAT1	up
hsa-miR-181b-5p	down	PALM2	up	PALM2	protein_coding	up	HMGA2-AS1	lincRNA	up	0.926552	1	0.926552	hsa-miR-181b-5p	down	HMGA2-AS1	up
hsa-miR-181b-5p	down	PALM2	up	PALM2	protein_coding	up	INHBA-AS1	lincRNA	up	0.917679	1	0.917679	hsa-miR-181b-5p	down	INHBA-AS1	up
hsa-miR-181b-5p	down	PALM2	up	PALM2	protein_coding	up	ARNTL2-AS1	lincRNA	up	0.920075	1	0.920075	hsa-miR-181b-5p	down	ARNTL2-AS1	up
hsa-miR-181b-5p	down	PALM2	up	PALM2	protein_coding	up	LINC00862	lincRNA	up	0.928279	1	0.928279	hsa-miR-181b-5p	down	LINC00862	up
hsa-miR-181b-5p	down	PALM2	up	PALM2	protein_coding	up	AL031770.1	lincRNA	up	0.875922	1	0.875922	hsa-miR-181b-5p	down	AL031770.1	up
hsa-miR-181b-5p	down	PALM2	up	PALM2	protein_coding	up	LINC00624	lincRNA	up	0.862723	1	0.862723	hsa-miR-181b-5p	down	LINC00624	up
hsa-miR-181b-5p	down	PALM2	up	PALM2	protein_coding	up	CFAP44-AS1	lincRNA	up	0.879037	1	0.879037	hsa-miR-181b-5p	down	CFAP44-AS1	up
hsa-miR-181b-5p	down	PALM2	up	PALM2	protein_coding	up	LINC02656	lincRNA	up	0.855287	1	0.855287	hsa-miR-181b-5p	down	LINC02656	up
hsa-miR-181b-5p	down	PALM2	up	PALM2	protein_coding	up	CARNMT1-AS1	lincRNA	up	0.88006	1	0.88006	hsa-miR-181b-5p	down	CARNMT1-AS1	up
hsa-miR-181b-5p	down	PALM2	up	PALM2	protein_coding	up	AC007496.1	lincRNA	up	0.876341	1	0.876341	hsa-miR-181b-5p	down	AC007496.1	up
hsa-miR-181b-5p	down	PALM2	up	PALM2	protein_coding	up	AC022973.3	lincRNA	up	0.954616	1	0.954616	hsa-miR-181b-5p	down	AC022973.3	up
hsa-miR-181b-5p	down	PALM2	up	PALM2	protein_coding	up	IGF2BP2-AS1	lincRNA	up	0.870891	1	0.870891	hsa-miR-181b-5p	down	IGF2BP2-AS1	up
hsa-miR-181b-5p	down	PALM2	up	PALM2	protein_coding	up	AL117190.1	lincRNA	up	0.87042	1	0.87042	hsa-miR-181b-5p	down	AL117190.1	up
hsa-miR-181b-5p	down	PALM2	up	PALM2	protein_coding	up	AC104462.1	lincRNA	up	0.865984	1	0.865984	hsa-miR-181b-5p	down	AC104462.1	up
hsa-miR-181b-5p	down	PALM2	up	PALM2	protein_coding	up	MEG8	lincRNA	up	0.899223	1	0.899223	hsa-miR-181b-5p	down	MEG8	up
hsa-miR-181b-5p	down	PALM2	up	PALM2	protein_coding	up	AC087286.2	lincRNA	up	0.851451	1	0.851451	hsa-miR-181b-5p	down	AC087286.2	up
hsa-miR-181b-5p	down	PALM2	up	PALM2	protein_coding	up	LPP-AS1	lincRNA	up	0.889151	1	0.889151	hsa-miR-181b-5p	down	LPP-AS1	up
hsa-miR-181b-5p	down	PALM2	up	PALM2	protein_coding	up	LINC01796	lincRNA	up	0.872067	1	0.872067	hsa-miR-181b-5p	down	LINC01796	up
hsa-miR-181b-5p	down	PALM2	up	PALM2	protein_coding	up	AC019270.1	lincRNA	up	0.862349	1	0.862349	hsa-miR-181b-5p	down	AC019270.1	up
hsa-miR-181b-5p	down	PALM2	up	PALM2	protein_coding	up	AL359693.1	lincRNA	up	0.889188	1	0.889188	hsa-miR-181b-5p	down	AL359693.1	up
hsa-miR-3074-5p	down	PALM2	up	PALM2	protein_coding	up	PKIA-AS1	lincRNA	up	0.887288	1	0.887288	hsa-miR-3074-5p	down	PKIA-AS1	up
hsa-miR-3074-5p	down	PALM2	up	PALM2	protein_coding	up	PLCG1-AS1	lincRNA	up	0.899463	1	0.899463	hsa-miR-3074-5p	down	PLCG1-AS1	up
hsa-miR-3074-5p	down	PALM2	up	PALM2	protein_coding	up	PRKG1-AS1	lincRNA	up	0.889422	1	0.889422	hsa-miR-3074-5p	down	PRKG1-AS1	up
hsa-miR-3074-5p	down	PALM2	up	PALM2	protein_coding	up	RAPGEF4-AS1	lincRNA	up	0.863487	1	0.863487	hsa-miR-3074-5p	down	RAPGEF4-AS1	up
hsa-miR-3074-5p	down	PALM2	up	PALM2	protein_coding	up	TEX41	lincRNA	up	0.937483	1	0.937483	hsa-miR-3074-5p	down	TEX41	up
hsa-miR-3074-5p	down	PALM2	up	PALM2	protein_coding	up	Z97200.1	lincRNA	up	0.911773	1	0.911773	hsa-miR-3074-5p	down	Z97200.1	up
hsa-miR-3074-5p	down	PALM2	up	PALM2	protein_coding	up	Z99289.2	lincRNA	up	0.87573	1	0.87573	hsa-miR-3074-5p	down	Z99289.2	up
hsa-miR-3074-5p	down	PALM2	up	PALM2	protein_coding	up	AC007750.1	lincRNA	up	0.864544	1	0.864544	hsa-miR-3074-5p	down	AC007750.1	up
hsa-miR-3074-5p	down	PALM2	up	PALM2	protein_coding	up	INHBA-AS1	lincRNA	up	0.917679	1	0.917679	hsa-miR-3074-5p	down	INHBA-AS1	up
hsa-miR-3074-5p	down	PALM2	up	PALM2	protein_coding	up	LINC01429	lincRNA	up	0.864108	1	0.864108	hsa-miR-3074-5p	down	LINC01429	up
hsa-miR-3074-5p	down	PALM2	up	PALM2	protein_coding	up	AL080317.2	lincRNA	up	0.893396	1	0.893396	hsa-miR-3074-5p	down	AL080317.2	up
hsa-miR-3074-5p	down	PALM2	up	PALM2	protein_coding	up	AC083806.2	lincRNA	up	0.8943	1	0.8943	hsa-miR-3074-5p	down	AC083806.2	up
hsa-miR-3074-5p	down	PALM2	up	PALM2	protein_coding	up	AC243772.2	lincRNA	up	0.881823	1	0.881823	hsa-miR-3074-5p	down	AC243772.2	up
hsa-miR-3074-5p	down	PALM2	up	PALM2	protein_coding	up	AC018557.2	lincRNA	up	0.853671	1	0.853671	hsa-miR-3074-5p	down	AC018557.2	up
hsa-miR-3074-5p	down	PALM2	up	PALM2	protein_coding	up	AC006460.1	lincRNA	up	0.948265	1	0.948265	hsa-miR-3074-5p	down	AC006460.1	up
hsa-miR-3074-5p	down	PALM2	up	PALM2	protein_coding	up	LINC00624	lincRNA	up	0.862723	1	0.862723	hsa-miR-3074-5p	down	LINC00624	up
hsa-miR-3074-5p	down	PALM2	up	PALM2	protein_coding	up	LINC02656	lincRNA	up	0.855287	1	0.855287	hsa-miR-3074-5p	down	LINC02656	up
hsa-miR-3074-5p	down	PALM2	up	PALM2	protein_coding	up	AC020661.3	lincRNA	up	0.928407	1	0.928407	hsa-miR-3074-5p	down	AC020661.3	up
hsa-miR-3074-5p	down	PALM2	up	PALM2	protein_coding	up	AC022395.1	lincRNA	up	0.896517	1	0.896517	hsa-miR-3074-5p	down	AC022395.1	up
hsa-miR-3074-5p	down	PALM2	up	PALM2	protein_coding	up	AL360091.3	lincRNA	up	0.94106	1	0.94106	hsa-miR-3074-5p	down	AL360091.3	up
hsa-miR-3074-5p	down	PALM2	up	PALM2	protein_coding	up	IGF2BP2-AS1	lincRNA	up	0.870891	1	0.870891	hsa-miR-3074-5p	down	IGF2BP2-AS1	up
hsa-miR-3074-5p	down	PALM2	up	PALM2	protein_coding	up	LINC01338	lincRNA	up	0.885266	1	0.885266	hsa-miR-3074-5p	down	LINC01338	up
hsa-miR-3074-5p	down	PALM2	up	PALM2	protein_coding	up	MEG8	lincRNA	up	0.899223	1	0.899223	hsa-miR-3074-5p	down	MEG8	up
hsa-miR-3074-5p	down	PALM2	up	PALM2	protein_coding	up	AP002518.1	lincRNA	up	0.969064	1	0.969064	hsa-miR-3074-5p	down	AP002518.1	up
hsa-miR-3074-5p	down	PALM2	up	PALM2	protein_coding	up	AL645504.1	lincRNA	up	0.9439	1	0.9439	hsa-miR-3074-5p	down	AL645504.1	up
hsa-miR-3074-5p	down	PALM2	up	PALM2	protein_coding	up	LPP-AS1	lincRNA	up	0.889151	1	0.889151	hsa-miR-3074-5p	down	LPP-AS1	up
hsa-miR-3074-5p	down	PALM2	up	PALM2	protein_coding	up	LINC01796	lincRNA	up	0.872067	1	0.872067	hsa-miR-3074-5p	down	LINC01796	up
hsa-miR-3074-5p	down	PALM2	up	PALM2	protein_coding	up	AC019270.1	lincRNA	up	0.862349	1	0.862349	hsa-miR-3074-5p	down	AC019270.1	up
hsa-miR-92a-3p	down	PALM2	up	PALM2	protein_coding	up	PKIA-AS1	lincRNA	up	0.887288	1	0.887288	hsa-miR-92a-3p	down	PKIA-AS1	up
hsa-miR-92a-3p	down	PALM2	up	PALM2	protein_coding	up	PLCG1-AS1	lincRNA	up	0.899463	1	0.899463	hsa-miR-92a-3p	down	PLCG1-AS1	up
hsa-miR-92a-3p	down	PALM2	up	PALM2	protein_coding	up	PRICKLE2-AS3	lincRNA	up	0.94003	1	0.94003	hsa-miR-92a-3p	down	PRICKLE2-AS3	up
hsa-miR-92a-3p	down	PALM2	up	PALM2	protein_coding	up	PRKG1-AS1	lincRNA	up	0.889422	1	0.889422	hsa-miR-92a-3p	down	PRKG1-AS1	up
hsa-miR-92a-3p	down	PALM2	up	PALM2	protein_coding	up	RAPGEF4-AS1	lincRNA	up	0.863487	1	0.863487	hsa-miR-92a-3p	down	RAPGEF4-AS1	up
hsa-miR-92a-3p	down	PALM2	up	PALM2	protein_coding	up	RDH10-AS1	lincRNA	up	0.92698	1	0.92698	hsa-miR-92a-3p	down	RDH10-AS1	up
hsa-miR-92a-3p	down	PALM2	up	PALM2	protein_coding	up	TEX41	lincRNA	up	0.937483	1	0.937483	hsa-miR-92a-3p	down	TEX41	up
hsa-miR-92a-3p	down	PALM2	up	PALM2	protein_coding	up	LINC01050	lincRNA	up	0.88929	1	0.88929	hsa-miR-92a-3p	down	LINC01050	up
hsa-miR-92a-3p	down	PALM2	up	PALM2	protein_coding	up	LUCAT1	lincRNA	up	0.856556	1	0.856556	hsa-miR-92a-3p	down	LUCAT1	up
hsa-miR-92a-3p	down	PALM2	up	PALM2	protein_coding	up	HMGA2-AS1	lincRNA	up	0.926552	1	0.926552	hsa-miR-92a-3p	down	HMGA2-AS1	up
hsa-miR-92a-3p	down	PALM2	up	PALM2	protein_coding	up	INHBA-AS1	lincRNA	up	0.917679	1	0.917679	hsa-miR-92a-3p	down	INHBA-AS1	up
hsa-miR-92a-3p	down	PALM2	up	PALM2	protein_coding	up	AL080317.2	lincRNA	up	0.893396	1	0.893396	hsa-miR-92a-3p	down	AL080317.2	up
hsa-miR-92a-3p	down	PALM2	up	PALM2	protein_coding	up	LINC00862	lincRNA	up	0.928279	1	0.928279	hsa-miR-92a-3p	down	LINC00862	up
hsa-miR-92a-3p	down	PALM2	up	PALM2	protein_coding	up	AC011352.1	lincRNA	up	0.850904	1	0.850904	hsa-miR-92a-3p	down	AC011352.1	up
hsa-miR-92a-3p	down	PALM2	up	PALM2	protein_coding	up	AC018557.2	lincRNA	up	0.853671	1	0.853671	hsa-miR-92a-3p	down	AC018557.2	up
hsa-miR-92a-3p	down	PALM2	up	PALM2	protein_coding	up	LINC02656	lincRNA	up	0.855287	1	0.855287	hsa-miR-92a-3p	down	LINC02656	up
hsa-miR-92a-3p	down	PALM2	up	PALM2	protein_coding	up	AC022540.1	lincRNA	up	0.923387	1	0.923387	hsa-miR-92a-3p	down	AC022540.1	up
hsa-miR-92a-3p	down	PALM2	up	PALM2	protein_coding	up	AC087276.3	lincRNA	up	0.860042	1	0.860042	hsa-miR-92a-3p	down	AC087276.3	up
hsa-miR-92a-3p	down	PALM2	up	PALM2	protein_coding	up	DOCK4-AS1	lincRNA	up	0.868917	1	0.868917	hsa-miR-92a-3p	down	DOCK4-AS1	up
hsa-miR-92a-3p	down	PALM2	up	PALM2	protein_coding	up	AP003498.1	lincRNA	up	0.900245	1	0.900245	hsa-miR-92a-3p	down	AP003498.1	up
hsa-miR-92a-3p	down	PALM2	up	PALM2	protein_coding	up	AC012358.1	lincRNA	up	0.85421	1	0.85421	hsa-miR-92a-3p	down	AC012358.1	up
hsa-miR-92a-3p	down	PALM2	up	PALM2	protein_coding	up	AL022097.1	lincRNA	up	0.855181	1	0.855181	hsa-miR-92a-3p	down	AL022097.1	up
hsa-miR-92a-3p	down	PALM2	up	PALM2	protein_coding	up	MEG8	lincRNA	up	0.899223	1	0.899223	hsa-miR-92a-3p	down	MEG8	up
hsa-miR-92a-3p	down	PALM2	up	PALM2	protein_coding	up	AC100800.1	lincRNA	up	0.927539	1	0.927539	hsa-miR-92a-3p	down	AC100800.1	up
hsa-miR-92a-3p	down	PALM2	up	PALM2	protein_coding	up	AC096708.2	lincRNA	up	0.911231	1	0.911231	hsa-miR-92a-3p	down	AC096708.2	up
hsa-miR-200c-3p	down	PALM2	up	PALM2	protein_coding	up	PKIA-AS1	lincRNA	up	0.887288	1	0.887288	hsa-miR-200c-3p	down	PKIA-AS1	up
hsa-miR-200c-3p	down	PALM2	up	PALM2	protein_coding	up	PLCG1-AS1	lincRNA	up	0.899463	1	0.899463	hsa-miR-200c-3p	down	PLCG1-AS1	up
hsa-miR-200c-3p	down	PALM2	up	PALM2	protein_coding	up	PRKG1-AS1	lincRNA	up	0.889422	1	0.889422	hsa-miR-200c-3p	down	PRKG1-AS1	up
hsa-miR-200c-3p	down	PALM2	up	PALM2	protein_coding	up	RAPGEF4-AS1	lincRNA	up	0.863487	1	0.863487	hsa-miR-200c-3p	down	RAPGEF4-AS1	up
hsa-miR-200c-3p	down	PALM2	up	PALM2	protein_coding	up	TEX41	lincRNA	up	0.937483	1	0.937483	hsa-miR-200c-3p	down	TEX41	up
hsa-miR-200c-3p	down	PALM2	up	PALM2	protein_coding	up	WASF3-AS1	lincRNA	up	0.903083	1	0.903083	hsa-miR-200c-3p	down	WASF3-AS1	up
hsa-miR-200c-3p	down	PALM2	up	PALM2	protein_coding	up	LUCAT1	lincRNA	up	0.856556	1	0.856556	hsa-miR-200c-3p	down	LUCAT1	up
hsa-miR-200c-3p	down	PALM2	up	PALM2	protein_coding	up	AC007750.1	lincRNA	up	0.864544	1	0.864544	hsa-miR-200c-3p	down	AC007750.1	up
hsa-miR-200c-3p	down	PALM2	up	PALM2	protein_coding	up	INHBA-AS1	lincRNA	up	0.917679	1	0.917679	hsa-miR-200c-3p	down	INHBA-AS1	up
hsa-miR-200c-3p	down	PALM2	up	PALM2	protein_coding	up	AC108463.3	lincRNA	up	0.851888	1	0.851888	hsa-miR-200c-3p	down	AC108463.3	up
hsa-miR-200c-3p	down	PALM2	up	PALM2	protein_coding	up	AC003986.2	lincRNA	up	0.884971	1	0.884971	hsa-miR-200c-3p	down	AC003986.2	up
hsa-miR-200c-3p	down	PALM2	up	PALM2	protein_coding	up	AC006460.1	lincRNA	up	0.948265	1	0.948265	hsa-miR-200c-3p	down	AC006460.1	up
hsa-miR-200c-3p	down	PALM2	up	PALM2	protein_coding	up	LINC00624	lincRNA	up	0.862723	1	0.862723	hsa-miR-200c-3p	down	LINC00624	up
hsa-miR-200c-3p	down	PALM2	up	PALM2	protein_coding	up	AC020661.3	lincRNA	up	0.928407	1	0.928407	hsa-miR-200c-3p	down	AC020661.3	up
hsa-miR-200c-3p	down	PALM2	up	PALM2	protein_coding	up	AC022395.1	lincRNA	up	0.896517	1	0.896517	hsa-miR-200c-3p	down	AC022395.1	up
hsa-miR-200c-3p	down	PALM2	up	PALM2	protein_coding	up	AC010401.1	lincRNA	up	0.934521	1	0.934521	hsa-miR-200c-3p	down	AC010401.1	up
hsa-miR-200c-3p	down	PALM2	up	PALM2	protein_coding	up	AC007298.1	lincRNA	up	0.911339	1	0.911339	hsa-miR-200c-3p	down	AC007298.1	up
hsa-miR-200c-3p	down	PALM2	up	PALM2	protein_coding	up	AC010285.1	lincRNA	up	0.866917	1	0.866917	hsa-miR-200c-3p	down	AC010285.1	up
hsa-miR-200c-3p	down	PALM2	up	PALM2	protein_coding	up	DOCK4-AS1	lincRNA	up	0.868917	1	0.868917	hsa-miR-200c-3p	down	DOCK4-AS1	up
hsa-miR-200c-3p	down	PALM2	up	PALM2	protein_coding	up	BACH1-IT2	lincRNA	up	0.853986	1	0.853986	hsa-miR-200c-3p	down	BACH1-IT2	up
hsa-miR-200c-3p	down	PALM2	up	PALM2	protein_coding	up	AC110792.2	lincRNA	up	0.879408	1	0.879408	hsa-miR-200c-3p	down	AC110792.2	up
hsa-miR-200c-3p	down	PALM2	up	PALM2	protein_coding	up	AL360091.3	lincRNA	up	0.94106	1	0.94106	hsa-miR-200c-3p	down	AL360091.3	up
hsa-miR-200c-3p	down	PALM2	up	PALM2	protein_coding	up	IGF2BP2-AS1	lincRNA	up	0.870891	1	0.870891	hsa-miR-200c-3p	down	IGF2BP2-AS1	up
hsa-miR-200c-3p	down	PALM2	up	PALM2	protein_coding	up	AL357568.1	lincRNA	up	0.85197	1	0.85197	hsa-miR-200c-3p	down	AL357568.1	up
hsa-miR-200c-3p	down	PALM2	up	PALM2	protein_coding	up	MEG8	lincRNA	up	0.899223	1	0.899223	hsa-miR-200c-3p	down	MEG8	up
hsa-miR-200c-3p	down	PALM2	up	PALM2	protein_coding	up	AC018878.1	lincRNA	up	0.882595	1	0.882595	hsa-miR-200c-3p	down	AC018878.1	up
hsa-miR-200c-3p	down	PALM2	up	PALM2	protein_coding	up	AC024475.1	lincRNA	up	0.881223	1	0.881223	hsa-miR-200c-3p	down	AC024475.1	up
hsa-miR-200c-3p	down	PALM2	up	PALM2	protein_coding	up	AC026782.2	lincRNA	up	0.923805	1	0.923805	hsa-miR-200c-3p	down	AC026782.2	up
hsa-miR-200c-3p	down	PALM2	up	PALM2	protein_coding	up	AC016866.2	lincRNA	up	0.904147	1	0.904147	hsa-miR-200c-3p	down	AC016866.2	up
hsa-miR-200c-3p	down	PALM2	up	PALM2	protein_coding	up	MYLK-AS2	lincRNA	up	0.912551	1	0.912551	hsa-miR-200c-3p	down	MYLK-AS2	up
hsa-miR-200c-3p	down	PALM2	up	PALM2	protein_coding	up	AL359693.1	lincRNA	up	0.889188	1	0.889188	hsa-miR-200c-3p	down	AL359693.1	up
hsa-miR-409-3p	down	PALM2	up	PALM2	protein_coding	up	PAPPA-AS2	lincRNA	up	0.924009	1	0.924009	hsa-miR-409-3p	down	PAPPA-AS2	up
hsa-miR-409-3p	down	PALM2	up	PALM2	protein_coding	up	PKIA-AS1	lincRNA	up	0.887288	1	0.887288	hsa-miR-409-3p	down	PKIA-AS1	up
hsa-miR-409-3p	down	PALM2	up	PALM2	protein_coding	up	PLCG1-AS1	lincRNA	up	0.899463	1	0.899463	hsa-miR-409-3p	down	PLCG1-AS1	up
hsa-miR-409-3p	down	PALM2	up	PALM2	protein_coding	up	PRKG1-AS1	lincRNA	up	0.889422	1	0.889422	hsa-miR-409-3p	down	PRKG1-AS1	up
hsa-miR-409-3p	down	PALM2	up	PALM2	protein_coding	up	RDH10-AS1	lincRNA	up	0.92698	1	0.92698	hsa-miR-409-3p	down	RDH10-AS1	up
hsa-miR-409-3p	down	PALM2	up	PALM2	protein_coding	up	ST7-AS2	lincRNA	up	0.863972	1	0.863972	hsa-miR-409-3p	down	ST7-AS2	up
hsa-miR-409-3p	down	PALM2	up	PALM2	protein_coding	up	TEX41	lincRNA	up	0.937483	1	0.937483	hsa-miR-409-3p	down	TEX41	up
hsa-miR-409-3p	down	PALM2	up	PALM2	protein_coding	up	LUCAT1	lincRNA	up	0.856556	1	0.856556	hsa-miR-409-3p	down	LUCAT1	up
hsa-miR-409-3p	down	PALM2	up	PALM2	protein_coding	up	HMGA2-AS1	lincRNA	up	0.926552	1	0.926552	hsa-miR-409-3p	down	HMGA2-AS1	up
hsa-miR-409-3p	down	PALM2	up	PALM2	protein_coding	up	AC007750.1	lincRNA	up	0.864544	1	0.864544	hsa-miR-409-3p	down	AC007750.1	up
hsa-miR-409-3p	down	PALM2	up	PALM2	protein_coding	up	AC083806.2	lincRNA	up	0.8943	1	0.8943	hsa-miR-409-3p	down	AC083806.2	up
hsa-miR-409-3p	down	PALM2	up	PALM2	protein_coding	up	LINC00624	lincRNA	up	0.862723	1	0.862723	hsa-miR-409-3p	down	LINC00624	up
hsa-miR-409-3p	down	PALM2	up	PALM2	protein_coding	up	GK-AS1	lincRNA	up	0.866441	1	0.866441	hsa-miR-409-3p	down	GK-AS1	up
hsa-miR-409-3p	down	PALM2	up	PALM2	protein_coding	up	AC020661.3	lincRNA	up	0.928407	1	0.928407	hsa-miR-409-3p	down	AC020661.3	up
hsa-miR-409-3p	down	PALM2	up	PALM2	protein_coding	up	AC022395.1	lincRNA	up	0.896517	1	0.896517	hsa-miR-409-3p	down	AC022395.1	up
hsa-miR-409-3p	down	PALM2	up	PALM2	protein_coding	up	AC010401.1	lincRNA	up	0.934521	1	0.934521	hsa-miR-409-3p	down	AC010401.1	up
hsa-miR-409-3p	down	PALM2	up	PALM2	protein_coding	up	AC010285.1	lincRNA	up	0.866917	1	0.866917	hsa-miR-409-3p	down	AC010285.1	up
hsa-miR-409-3p	down	PALM2	up	PALM2	protein_coding	up	AC022973.3	lincRNA	up	0.954616	1	0.954616	hsa-miR-409-3p	down	AC022973.3	up
hsa-miR-409-3p	down	PALM2	up	PALM2	protein_coding	up	LINC01338	lincRNA	up	0.885266	1	0.885266	hsa-miR-409-3p	down	LINC01338	up
hsa-miR-409-3p	down	PALM2	up	PALM2	protein_coding	up	MEG8	lincRNA	up	0.899223	1	0.899223	hsa-miR-409-3p	down	MEG8	up
hsa-miR-409-3p	down	PALM2	up	PALM2	protein_coding	up	AC020913.3	lincRNA	up	0.901904	1	0.901904	hsa-miR-409-3p	down	AC020913.3	up
hsa-miR-409-3p	down	PALM2	up	PALM2	protein_coding	up	AC024475.1	lincRNA	up	0.881223	1	0.881223	hsa-miR-409-3p	down	AC024475.1	up
hsa-miR-409-3p	down	PALM2	up	PALM2	protein_coding	up	KCNMA1-AS3	lincRNA	up	0.962235	1	0.962235	hsa-miR-409-3p	down	KCNMA1-AS3	up
hsa-miR-409-3p	down	PALM2	up	PALM2	protein_coding	up	LIPC-AS1	lincRNA	up	0.913632	1	0.913632	hsa-miR-409-3p	down	LIPC-AS1	up
hsa-miR-409-3p	down	PALM2	up	PALM2	protein_coding	up	AL359693.1	lincRNA	up	0.889188	1	0.889188	hsa-miR-409-3p	down	AL359693.1	up
hsa-miR-92b-3p	down	PALM2	up	PALM2	protein_coding	up	PKIA-AS1	lincRNA	up	0.887288	1	0.887288	hsa-miR-92b-3p	down	PKIA-AS1	up
hsa-miR-92b-3p	down	PALM2	up	PALM2	protein_coding	up	PLCG1-AS1	lincRNA	up	0.899463	1	0.899463	hsa-miR-92b-3p	down	PLCG1-AS1	up
hsa-miR-92b-3p	down	PALM2	up	PALM2	protein_coding	up	PRICKLE2-AS3	lincRNA	up	0.94003	1	0.94003	hsa-miR-92b-3p	down	PRICKLE2-AS3	up
hsa-miR-92b-3p	down	PALM2	up	PALM2	protein_coding	up	PRKG1-AS1	lincRNA	up	0.889422	1	0.889422	hsa-miR-92b-3p	down	PRKG1-AS1	up
hsa-miR-92b-3p	down	PALM2	up	PALM2	protein_coding	up	RAPGEF4-AS1	lincRNA	up	0.863487	1	0.863487	hsa-miR-92b-3p	down	RAPGEF4-AS1	up
hsa-miR-92b-3p	down	PALM2	up	PALM2	protein_coding	up	RDH10-AS1	lincRNA	up	0.92698	1	0.92698	hsa-miR-92b-3p	down	RDH10-AS1	up
hsa-miR-92b-3p	down	PALM2	up	PALM2	protein_coding	up	TEX41	lincRNA	up	0.937483	1	0.937483	hsa-miR-92b-3p	down	TEX41	up
hsa-miR-92b-3p	down	PALM2	up	PALM2	protein_coding	up	LUCAT1	lincRNA	up	0.856556	1	0.856556	hsa-miR-92b-3p	down	LUCAT1	up
hsa-miR-92b-3p	down	PALM2	up	PALM2	protein_coding	up	HMGA2-AS1	lincRNA	up	0.926552	1	0.926552	hsa-miR-92b-3p	down	HMGA2-AS1	up
hsa-miR-92b-3p	down	PALM2	up	PALM2	protein_coding	up	INHBA-AS1	lincRNA	up	0.917679	1	0.917679	hsa-miR-92b-3p	down	INHBA-AS1	up
hsa-miR-92b-3p	down	PALM2	up	PALM2	protein_coding	up	AL080317.2	lincRNA	up	0.893396	1	0.893396	hsa-miR-92b-3p	down	AL080317.2	up
hsa-miR-92b-3p	down	PALM2	up	PALM2	protein_coding	up	LINC00862	lincRNA	up	0.928279	1	0.928279	hsa-miR-92b-3p	down	LINC00862	up
hsa-miR-92b-3p	down	PALM2	up	PALM2	protein_coding	up	MRTFA-AS1	lincRNA	up	0.89097	1	0.89097	hsa-miR-92b-3p	down	MRTFA-AS1	up
hsa-miR-92b-3p	down	PALM2	up	PALM2	protein_coding	up	AC011352.1	lincRNA	up	0.850904	1	0.850904	hsa-miR-92b-3p	down	AC011352.1	up
hsa-miR-92b-3p	down	PALM2	up	PALM2	protein_coding	up	AC018557.2	lincRNA	up	0.853671	1	0.853671	hsa-miR-92b-3p	down	AC018557.2	up
hsa-miR-92b-3p	down	PALM2	up	PALM2	protein_coding	up	AC022540.1	lincRNA	up	0.923387	1	0.923387	hsa-miR-92b-3p	down	AC022540.1	up
hsa-miR-92b-3p	down	PALM2	up	PALM2	protein_coding	up	AC010401.1	lincRNA	up	0.934521	1	0.934521	hsa-miR-92b-3p	down	AC010401.1	up
hsa-miR-92b-3p	down	PALM2	up	PALM2	protein_coding	up	AC087276.3	lincRNA	up	0.860042	1	0.860042	hsa-miR-92b-3p	down	AC087276.3	up
hsa-miR-92b-3p	down	PALM2	up	PALM2	protein_coding	up	AL365356.1	lincRNA	up	0.852507	1	0.852507	hsa-miR-92b-3p	down	AL365356.1	up
hsa-miR-92b-3p	down	PALM2	up	PALM2	protein_coding	up	AC078962.3	lincRNA	up	0.850458	1	0.850458	hsa-miR-92b-3p	down	AC078962.3	up
hsa-miR-92b-3p	down	PALM2	up	PALM2	protein_coding	up	AP003498.1	lincRNA	up	0.900245	1	0.900245	hsa-miR-92b-3p	down	AP003498.1	up
hsa-miR-92b-3p	down	PALM2	up	PALM2	protein_coding	up	AC012358.1	lincRNA	up	0.85421	1	0.85421	hsa-miR-92b-3p	down	AC012358.1	up
hsa-miR-92b-3p	down	PALM2	up	PALM2	protein_coding	up	AL022097.1	lincRNA	up	0.855181	1	0.855181	hsa-miR-92b-3p	down	AL022097.1	up
hsa-miR-92b-3p	down	PALM2	up	PALM2	protein_coding	up	MEG8	lincRNA	up	0.899223	1	0.899223	hsa-miR-92b-3p	down	MEG8	up
hsa-miR-92b-3p	down	PALM2	up	PALM2	protein_coding	up	AC100800.1	lincRNA	up	0.927539	1	0.927539	hsa-miR-92b-3p	down	AC100800.1	up
hsa-miR-92b-3p	down	PALM2	up	PALM2	protein_coding	up	AP001527.1	lincRNA	up	0.855654	1	0.855654	hsa-miR-92b-3p	down	AP001527.1	up
hsa-miR-92b-3p	down	PALM2	up	PALM2	protein_coding	up	AC136424.2	lincRNA	up	0.954211	1	0.954211	hsa-miR-92b-3p	down	AC136424.2	up
hsa-miR-92b-3p	down	PALM2	up	PALM2	protein_coding	up	AC096708.2	lincRNA	up	0.911231	1	0.911231	hsa-miR-92b-3p	down	AC096708.2	up
hsa-miR-664a-3p	down	PALM2	up	PALM2	protein_coding	up	PAPPA-AS2	lincRNA	up	0.924009	1	0.924009	hsa-miR-664a-3p	down	PAPPA-AS2	up
hsa-miR-664a-3p	down	PALM2	up	PALM2	protein_coding	up	PKIA-AS1	lincRNA	up	0.887288	1	0.887288	hsa-miR-664a-3p	down	PKIA-AS1	up
hsa-miR-664a-3p	down	PALM2	up	PALM2	protein_coding	up	PLCG1-AS1	lincRNA	up	0.899463	1	0.899463	hsa-miR-664a-3p	down	PLCG1-AS1	up
hsa-miR-664a-3p	down	PALM2	up	PALM2	protein_coding	up	PRICKLE2-AS3	lincRNA	up	0.94003	1	0.94003	hsa-miR-664a-3p	down	PRICKLE2-AS3	up
hsa-miR-664a-3p	down	PALM2	up	PALM2	protein_coding	up	PTPRJ-AS1	lincRNA	up	0.851084	1	0.851084	hsa-miR-664a-3p	down	PTPRJ-AS1	up
hsa-miR-664a-3p	down	PALM2	up	PALM2	protein_coding	up	RAPGEF4-AS1	lincRNA	up	0.863487	1	0.863487	hsa-miR-664a-3p	down	RAPGEF4-AS1	up
hsa-miR-664a-3p	down	PALM2	up	PALM2	protein_coding	up	RDH10-AS1	lincRNA	up	0.92698	1	0.92698	hsa-miR-664a-3p	down	RDH10-AS1	up
hsa-miR-664a-3p	down	PALM2	up	PALM2	protein_coding	up	TEX41	lincRNA	up	0.937483	1	0.937483	hsa-miR-664a-3p	down	TEX41	up
hsa-miR-664a-3p	down	PALM2	up	PALM2	protein_coding	up	ZMYM4-AS1	lincRNA	up	0.872952	1	0.872952	hsa-miR-664a-3p	down	ZMYM4-AS1	up
hsa-miR-664a-3p	down	PALM2	up	PALM2	protein_coding	up	LINC01050	lincRNA	up	0.88929	1	0.88929	hsa-miR-664a-3p	down	LINC01050	up
hsa-miR-664a-3p	down	PALM2	up	PALM2	protein_coding	up	LUCAT1	lincRNA	up	0.856556	1	0.856556	hsa-miR-664a-3p	down	LUCAT1	up
hsa-miR-664a-3p	down	PALM2	up	PALM2	protein_coding	up	HMGA2-AS1	lincRNA	up	0.926552	1	0.926552	hsa-miR-664a-3p	down	HMGA2-AS1	up
hsa-miR-664a-3p	down	PALM2	up	PALM2	protein_coding	up	AC007750.1	lincRNA	up	0.864544	1	0.864544	hsa-miR-664a-3p	down	AC007750.1	up
hsa-miR-664a-3p	down	PALM2	up	PALM2	protein_coding	up	CD44-AS1	lincRNA	up	0.862032	1	0.862032	hsa-miR-664a-3p	down	CD44-AS1	up
hsa-miR-664a-3p	down	PALM2	up	PALM2	protein_coding	up	INHBA-AS1	lincRNA	up	0.917679	1	0.917679	hsa-miR-664a-3p	down	INHBA-AS1	up
hsa-miR-664a-3p	down	PALM2	up	PALM2	protein_coding	up	LINC01429	lincRNA	up	0.864108	1	0.864108	hsa-miR-664a-3p	down	LINC01429	up
hsa-miR-664a-3p	down	PALM2	up	PALM2	protein_coding	up	AL080317.2	lincRNA	up	0.893396	1	0.893396	hsa-miR-664a-3p	down	AL080317.2	up
hsa-miR-664a-3p	down	PALM2	up	PALM2	protein_coding	up	AC083806.2	lincRNA	up	0.8943	1	0.8943	hsa-miR-664a-3p	down	AC083806.2	up
hsa-miR-664a-3p	down	PALM2	up	PALM2	protein_coding	up	LINC00862	lincRNA	up	0.928279	1	0.928279	hsa-miR-664a-3p	down	LINC00862	up
hsa-miR-664a-3p	down	PALM2	up	PALM2	protein_coding	up	MRTFA-AS1	lincRNA	up	0.89097	1	0.89097	hsa-miR-664a-3p	down	MRTFA-AS1	up
hsa-miR-664a-3p	down	PALM2	up	PALM2	protein_coding	up	AC006460.1	lincRNA	up	0.948265	1	0.948265	hsa-miR-664a-3p	down	AC006460.1	up
hsa-miR-664a-3p	down	PALM2	up	PALM2	protein_coding	up	AC069542.1	lincRNA	up	0.892897	1	0.892897	hsa-miR-664a-3p	down	AC069542.1	up
hsa-miR-664a-3p	down	PALM2	up	PALM2	protein_coding	up	LINC00624	lincRNA	up	0.862723	1	0.862723	hsa-miR-664a-3p	down	LINC00624	up
hsa-miR-664a-3p	down	PALM2	up	PALM2	protein_coding	up	LINC02656	lincRNA	up	0.855287	1	0.855287	hsa-miR-664a-3p	down	LINC02656	up
hsa-miR-664a-3p	down	PALM2	up	PALM2	protein_coding	up	AC022540.1	lincRNA	up	0.923387	1	0.923387	hsa-miR-664a-3p	down	AC022540.1	up
hsa-miR-664a-3p	down	PALM2	up	PALM2	protein_coding	up	AC010401.1	lincRNA	up	0.934521	1	0.934521	hsa-miR-664a-3p	down	AC010401.1	up
hsa-miR-664a-3p	down	PALM2	up	PALM2	protein_coding	up	AC087276.3	lincRNA	up	0.860042	1	0.860042	hsa-miR-664a-3p	down	AC087276.3	up
hsa-miR-664a-3p	down	PALM2	up	PALM2	protein_coding	up	AC073569.1	lincRNA	up	0.885658	1	0.885658	hsa-miR-664a-3p	down	AC073569.1	up
hsa-miR-664a-3p	down	PALM2	up	PALM2	protein_coding	up	DOCK4-AS1	lincRNA	up	0.868917	1	0.868917	hsa-miR-664a-3p	down	DOCK4-AS1	up
hsa-miR-664a-3p	down	PALM2	up	PALM2	protein_coding	up	AC068389.3	lincRNA	up	0.863228	1	0.863228	hsa-miR-664a-3p	down	AC068389.3	up
hsa-miR-664a-3p	down	PALM2	up	PALM2	protein_coding	up	AL139095.4	lincRNA	up	0.890448	1	0.890448	hsa-miR-664a-3p	down	AL139095.4	up
hsa-miR-664a-3p	down	PALM2	up	PALM2	protein_coding	up	AC022973.3	lincRNA	up	0.954616	1	0.954616	hsa-miR-664a-3p	down	AC022973.3	up
hsa-miR-664a-3p	down	PALM2	up	PALM2	protein_coding	up	AP003498.1	lincRNA	up	0.900245	1	0.900245	hsa-miR-664a-3p	down	AP003498.1	up
hsa-miR-664a-3p	down	PALM2	up	PALM2	protein_coding	up	AC002064.1	lincRNA	up	0.851348	1	0.851348	hsa-miR-664a-3p	down	AC002064.1	up
hsa-miR-664a-3p	down	PALM2	up	PALM2	protein_coding	up	LINC01338	lincRNA	up	0.885266	1	0.885266	hsa-miR-664a-3p	down	LINC01338	up
hsa-miR-664a-3p	down	PALM2	up	PALM2	protein_coding	up	AC008121.3	lincRNA	up	0.880654	1	0.880654	hsa-miR-664a-3p	down	AC008121.3	up
hsa-miR-664a-3p	down	PALM2	up	PALM2	protein_coding	up	AL117190.1	lincRNA	up	0.87042	1	0.87042	hsa-miR-664a-3p	down	AL117190.1	up
hsa-miR-664a-3p	down	PALM2	up	PALM2	protein_coding	up	AC104462.1	lincRNA	up	0.865984	1	0.865984	hsa-miR-664a-3p	down	AC104462.1	up
hsa-miR-664a-3p	down	PALM2	up	PALM2	protein_coding	up	MEG8	lincRNA	up	0.899223	1	0.899223	hsa-miR-664a-3p	down	MEG8	up
hsa-miR-664a-3p	down	PALM2	up	PALM2	protein_coding	up	AC087286.1	lincRNA	up	0.876537	1	0.876537	hsa-miR-664a-3p	down	AC087286.1	up
hsa-miR-664a-3p	down	PALM2	up	PALM2	protein_coding	up	AC006270.1	lincRNA	up	0.879559	1	0.879559	hsa-miR-664a-3p	down	AC006270.1	up
hsa-miR-664a-3p	down	PALM2	up	PALM2	protein_coding	up	AC018462.1	lincRNA	up	0.872573	1	0.872573	hsa-miR-664a-3p	down	AC018462.1	up
hsa-miR-664a-3p	down	PALM2	up	PALM2	protein_coding	up	AP002518.1	lincRNA	up	0.969064	1	0.969064	hsa-miR-664a-3p	down	AP002518.1	up
hsa-miR-664a-3p	down	PALM2	up	PALM2	protein_coding	up	AC087286.2	lincRNA	up	0.851451	1	0.851451	hsa-miR-664a-3p	down	AC087286.2	up
hsa-miR-664a-3p	down	PALM2	up	PALM2	protein_coding	up	LPP-AS1	lincRNA	up	0.889151	1	0.889151	hsa-miR-664a-3p	down	LPP-AS1	up
hsa-miR-664a-3p	down	PALM2	up	PALM2	protein_coding	up	AC026782.2	lincRNA	up	0.923805	1	0.923805	hsa-miR-664a-3p	down	AC026782.2	up
hsa-miR-664a-3p	down	PALM2	up	PALM2	protein_coding	up	AC016866.2	lincRNA	up	0.904147	1	0.904147	hsa-miR-664a-3p	down	AC016866.2	up
hsa-miR-664a-3p	down	PALM2	up	PALM2	protein_coding	up	AL162253.1	lincRNA	up	0.950272	1	0.950272	hsa-miR-664a-3p	down	AL162253.1	up
hsa-miR-664a-3p	down	PALM2	up	PALM2	protein_coding	up	AC136424.2	lincRNA	up	0.954211	1	0.954211	hsa-miR-664a-3p	down	AC136424.2	up
hsa-miR-664a-3p	down	PALM2	up	PALM2	protein_coding	up	AL359693.1	lincRNA	up	0.889188	1	0.889188	hsa-miR-664a-3p	down	AL359693.1	up
hsa-miR-17-5p	up	PCDH15	down	PCDH15	protein_coding	down	CPEB1-AS1	lincRNA	down	0.89753	1	0.89753	hsa-miR-17-5p	up	CPEB1-AS1	down
hsa-miR-17-5p	up	PCDH15	down	PCDH15	protein_coding	down	AC106895.2	lincRNA	down	0.916406	1	0.916406	hsa-miR-17-5p	up	AC106895.2	down
hsa-miR-17-5p	up	PCDH15	down	PCDH15	protein_coding	down	LY86-AS1	lincRNA	down	0.869291	1	0.869291	hsa-miR-17-5p	up	LY86-AS1	down
hsa-miR-17-5p	up	PCDH15	down	PCDH15	protein_coding	down	AL110292.1	lincRNA	down	0.854259	1	0.854259	hsa-miR-17-5p	up	AL110292.1	down
hsa-miR-17-5p	up	PCDH15	down	PCDH15	protein_coding	down	AC093390.1	lincRNA	down	0.884829	1	0.884829	hsa-miR-17-5p	up	AC093390.1	down
hsa-miR-20a-5p	up	PCDH15	down	PCDH15	protein_coding	down	LINC00671	lincRNA	down	0.855927	1	0.855927	hsa-miR-20a-5p	up	LINC00671	down
hsa-miR-20a-5p	up	PCDH15	down	PCDH15	protein_coding	down	CPEB1-AS1	lincRNA	down	0.89753	1	0.89753	hsa-miR-20a-5p	up	CPEB1-AS1	down
hsa-miR-20a-5p	up	PCDH15	down	PCDH15	protein_coding	down	AC106895.2	lincRNA	down	0.916406	1	0.916406	hsa-miR-20a-5p	up	AC106895.2	down
hsa-miR-20a-5p	up	PCDH15	down	PCDH15	protein_coding	down	LY86-AS1	lincRNA	down	0.869291	1	0.869291	hsa-miR-20a-5p	up	LY86-AS1	down
hsa-miR-20a-5p	up	PCDH15	down	PCDH15	protein_coding	down	AL110292.1	lincRNA	down	0.854259	1	0.854259	hsa-miR-20a-5p	up	AL110292.1	down
hsa-miR-20a-5p	up	PCDH15	down	PCDH15	protein_coding	down	AC093390.1	lincRNA	down	0.884829	1	0.884829	hsa-miR-20a-5p	up	AC093390.1	down
hsa-miR-106a-5p	up	PCDH15	down	PCDH15	protein_coding	down	CPEB1-AS1	lincRNA	down	0.89753	1	0.89753	hsa-miR-106a-5p	up	CPEB1-AS1	down
hsa-miR-106a-5p	up	PCDH15	down	PCDH15	protein_coding	down	AC106895.2	lincRNA	down	0.916406	1	0.916406	hsa-miR-106a-5p	up	AC106895.2	down
hsa-miR-106a-5p	up	PCDH15	down	PCDH15	protein_coding	down	LY86-AS1	lincRNA	down	0.869291	1	0.869291	hsa-miR-106a-5p	up	LY86-AS1	down
hsa-miR-106a-5p	up	PCDH15	down	PCDH15	protein_coding	down	AL110292.1	lincRNA	down	0.854259	1	0.854259	hsa-miR-106a-5p	up	AL110292.1	down
hsa-miR-106a-5p	up	PCDH15	down	PCDH15	protein_coding	down	AC093390.1	lincRNA	down	0.884829	1	0.884829	hsa-miR-106a-5p	up	AC093390.1	down
hsa-miR-106b-5p	up	PCDH15	down	PCDH15	protein_coding	down	CPEB1-AS1	lincRNA	down	0.89753	1	0.89753	hsa-miR-106b-5p	up	CPEB1-AS1	down
hsa-miR-106b-5p	up	PCDH15	down	PCDH15	protein_coding	down	AL110292.1	lincRNA	down	0.854259	1	0.854259	hsa-miR-106b-5p	up	AL110292.1	down
hsa-miR-130a-3p	up	PCDH15	down	PCDH15	protein_coding	down	AC106895.2	lincRNA	down	0.916406	1	0.916406	hsa-miR-130a-3p	up	AC106895.2	down
hsa-miR-130a-3p	up	PCDH15	down	PCDH15	protein_coding	down	AL110292.1	lincRNA	down	0.854259	1	0.854259	hsa-miR-130a-3p	up	AL110292.1	down
hsa-miR-335-3p	up	PCDH15	down	PCDH15	protein_coding	down	CPEB1-AS1	lincRNA	down	0.89753	1	0.89753	hsa-miR-335-3p	up	CPEB1-AS1	down
hsa-miR-335-3p	up	PCDH15	down	PCDH15	protein_coding	down	AC106895.2	lincRNA	down	0.916406	1	0.916406	hsa-miR-335-3p	up	AC106895.2	down
hsa-miR-335-3p	up	PCDH15	down	PCDH15	protein_coding	down	LY86-AS1	lincRNA	down	0.869291	1	0.869291	hsa-miR-335-3p	up	LY86-AS1	down
hsa-miR-335-3p	up	PCDH15	down	PCDH15	protein_coding	down	AL110292.1	lincRNA	down	0.854259	1	0.854259	hsa-miR-335-3p	up	AL110292.1	down
hsa-miR-335-3p	up	PCDH15	down	PCDH15	protein_coding	down	AC093390.1	lincRNA	down	0.884829	1	0.884829	hsa-miR-335-3p	up	AC093390.1	down
hsa-miR-185-5p	up	PHLPP2	down	PHLPP2	protein_coding	down	AC016027.1	lincRNA	down	0.852284	1	0.852284	hsa-miR-185-5p	up	AC016027.1	down
hsa-miR-106b-5p	up	PHLPP2	down	PHLPP2	protein_coding	down	AC016027.1	lincRNA	down	0.852284	1	0.852284	hsa-miR-106b-5p	up	AC016027.1	down
hsa-miR-29b-3p	up	PLP1	down	PLP1	protein_coding	down	HAND2-AS1	lincRNA	down	0.855781	1	0.855781	hsa-miR-29b-3p	up	HAND2-AS1	down
hsa-miR-29c-3p	up	PLP1	down	PLP1	protein_coding	down	HAND2-AS1	lincRNA	down	0.855781	1	0.855781	hsa-miR-29c-3p	up	HAND2-AS1	down
hsa-let-7f-5p	up	PPP1R12B	down	PPP1R12B	protein_coding	down	MBNL1-AS1	lincRNA	down	0.95499	1	0.95499	hsa-let-7f-5p	up	MBNL1-AS1	down
hsa-let-7f-5p	up	PPP1R12B	down	PPP1R12B	protein_coding	down	HAND2-AS1	lincRNA	down	0.852392	1	0.852392	hsa-let-7f-5p	up	HAND2-AS1	down
hsa-let-7f-5p	up	PPP1R12B	down	PPP1R12B	protein_coding	down	AC036108.3	lincRNA	down	0.928092	1	0.928092	hsa-let-7f-5p	up	AC036108.3	down
hsa-let-7f-5p	up	PPP1R12B	down	PPP1R12B	protein_coding	down	FENDRR	lincRNA	down	0.857263	1	0.857263	hsa-let-7f-5p	up	FENDRR	down
hsa-let-7f-5p	up	PPP1R12B	down	PPP1R12B	protein_coding	down	AL356489.2	lincRNA	down	0.911381	1	0.911381	hsa-let-7f-5p	up	AL356489.2	down
hsa-miR-17-5p	up	PPP1R12B	down	PPP1R12B	protein_coding	down	MBNL1-AS1	lincRNA	down	0.95499	1	0.95499	hsa-miR-17-5p	up	MBNL1-AS1	down
hsa-miR-17-5p	up	PPP1R12B	down	PPP1R12B	protein_coding	down	HAND2-AS1	lincRNA	down	0.852392	1	0.852392	hsa-miR-17-5p	up	HAND2-AS1	down
hsa-miR-17-5p	up	PPP1R12B	down	PPP1R12B	protein_coding	down	FENDRR	lincRNA	down	0.857263	1	0.857263	hsa-miR-17-5p	up	FENDRR	down
hsa-miR-17-5p	up	PPP1R12B	down	PPP1R12B	protein_coding	down	AL356489.2	lincRNA	down	0.911381	1	0.911381	hsa-miR-17-5p	up	AL356489.2	down
hsa-miR-20a-5p	up	PPP1R12B	down	PPP1R12B	protein_coding	down	MBNL1-AS1	lincRNA	down	0.95499	1	0.95499	hsa-miR-20a-5p	up	MBNL1-AS1	down
hsa-miR-20a-5p	up	PPP1R12B	down	PPP1R12B	protein_coding	down	HAND2-AS1	lincRNA	down	0.852392	1	0.852392	hsa-miR-20a-5p	up	HAND2-AS1	down
hsa-miR-20a-5p	up	PPP1R12B	down	PPP1R12B	protein_coding	down	FENDRR	lincRNA	down	0.857263	1	0.857263	hsa-miR-20a-5p	up	FENDRR	down
hsa-miR-20a-5p	up	PPP1R12B	down	PPP1R12B	protein_coding	down	AC009102.2	lincRNA	down	0.89481	1	0.89481	hsa-miR-20a-5p	up	AC009102.2	down
hsa-miR-20a-5p	up	PPP1R12B	down	PPP1R12B	protein_coding	down	AL356489.2	lincRNA	down	0.911381	1	0.911381	hsa-miR-20a-5p	up	AL356489.2	down
hsa-miR-98-5p	up	PPP1R12B	down	PPP1R12B	protein_coding	down	MBNL1-AS1	lincRNA	down	0.95499	1	0.95499	hsa-miR-98-5p	up	MBNL1-AS1	down
hsa-miR-98-5p	up	PPP1R12B	down	PPP1R12B	protein_coding	down	HAND2-AS1	lincRNA	down	0.852392	1	0.852392	hsa-miR-98-5p	up	HAND2-AS1	down
hsa-miR-98-5p	up	PPP1R12B	down	PPP1R12B	protein_coding	down	AC036108.3	lincRNA	down	0.928092	1	0.928092	hsa-miR-98-5p	up	AC036108.3	down
hsa-miR-98-5p	up	PPP1R12B	down	PPP1R12B	protein_coding	down	FENDRR	lincRNA	down	0.857263	1	0.857263	hsa-miR-98-5p	up	FENDRR	down
hsa-miR-98-5p	up	PPP1R12B	down	PPP1R12B	protein_coding	down	AL356489.2	lincRNA	down	0.911381	1	0.911381	hsa-miR-98-5p	up	AL356489.2	down
hsa-miR-106a-5p	up	PPP1R12B	down	PPP1R12B	protein_coding	down	MBNL1-AS1	lincRNA	down	0.95499	1	0.95499	hsa-miR-106a-5p	up	MBNL1-AS1	down
hsa-miR-106a-5p	up	PPP1R12B	down	PPP1R12B	protein_coding	down	HAND2-AS1	lincRNA	down	0.852392	1	0.852392	hsa-miR-106a-5p	up	HAND2-AS1	down
hsa-miR-106a-5p	up	PPP1R12B	down	PPP1R12B	protein_coding	down	FENDRR	lincRNA	down	0.857263	1	0.857263	hsa-miR-106a-5p	up	FENDRR	down
hsa-miR-106a-5p	up	PPP1R12B	down	PPP1R12B	protein_coding	down	AL356489.2	lincRNA	down	0.911381	1	0.911381	hsa-miR-106a-5p	up	AL356489.2	down
hsa-miR-196a-5p	up	PPP1R12B	down	PPP1R12B	protein_coding	down	MBNL1-AS1	lincRNA	down	0.95499	1	0.95499	hsa-miR-196a-5p	up	MBNL1-AS1	down
hsa-miR-196a-5p	up	PPP1R12B	down	PPP1R12B	protein_coding	down	HAND2-AS1	lincRNA	down	0.852392	1	0.852392	hsa-miR-196a-5p	up	HAND2-AS1	down
hsa-miR-196a-5p	up	PPP1R12B	down	PPP1R12B	protein_coding	down	AC036108.3	lincRNA	down	0.928092	1	0.928092	hsa-miR-196a-5p	up	AC036108.3	down
hsa-let-7g-5p	up	PPP1R12B	down	PPP1R12B	protein_coding	down	MBNL1-AS1	lincRNA	down	0.95499	1	0.95499	hsa-let-7g-5p	up	MBNL1-AS1	down
hsa-let-7g-5p	up	PPP1R12B	down	PPP1R12B	protein_coding	down	HAND2-AS1	lincRNA	down	0.852392	1	0.852392	hsa-let-7g-5p	up	HAND2-AS1	down
hsa-let-7g-5p	up	PPP1R12B	down	PPP1R12B	protein_coding	down	FENDRR	lincRNA	down	0.857263	1	0.857263	hsa-let-7g-5p	up	FENDRR	down
hsa-miR-126-5p	up	PPP1R12B	down	PPP1R12B	protein_coding	down	MBNL1-AS1	lincRNA	down	0.95499	1	0.95499	hsa-miR-126-5p	up	MBNL1-AS1	down
hsa-miR-126-5p	up	PPP1R12B	down	PPP1R12B	protein_coding	down	HAND2-AS1	lincRNA	down	0.852392	1	0.852392	hsa-miR-126-5p	up	HAND2-AS1	down
hsa-miR-126-5p	up	PPP1R12B	down	PPP1R12B	protein_coding	down	FENDRR	lincRNA	down	0.857263	1	0.857263	hsa-miR-126-5p	up	FENDRR	down
hsa-miR-106b-5p	up	PPP1R12B	down	PPP1R12B	protein_coding	down	MBNL1-AS1	lincRNA	down	0.95499	1	0.95499	hsa-miR-106b-5p	up	MBNL1-AS1	down
hsa-miR-106b-5p	up	PPP1R12B	down	PPP1R12B	protein_coding	down	HAND2-AS1	lincRNA	down	0.852392	1	0.852392	hsa-miR-106b-5p	up	HAND2-AS1	down
hsa-miR-106b-5p	up	PPP1R12B	down	PPP1R12B	protein_coding	down	FENDRR	lincRNA	down	0.857263	1	0.857263	hsa-miR-106b-5p	up	FENDRR	down
hsa-miR-106b-5p	up	PPP1R12B	down	PPP1R12B	protein_coding	down	AC009102.2	lincRNA	down	0.89481	1	0.89481	hsa-miR-106b-5p	up	AC009102.2	down
hsa-miR-106b-5p	up	PPP1R12B	down	PPP1R12B	protein_coding	down	AL356489.2	lincRNA	down	0.911381	1	0.911381	hsa-miR-106b-5p	up	AL356489.2	down
hsa-miR-196b-5p	up	PPP1R12B	down	PPP1R12B	protein_coding	down	MBNL1-AS1	lincRNA	down	0.95499	1	0.95499	hsa-miR-196b-5p	up	MBNL1-AS1	down
hsa-miR-196b-5p	up	PPP1R12B	down	PPP1R12B	protein_coding	down	HAND2-AS1	lincRNA	down	0.852392	1	0.852392	hsa-miR-196b-5p	up	HAND2-AS1	down
hsa-miR-429	up	PPP1R12B	down	PPP1R12B	protein_coding	down	MBNL1-AS1	lincRNA	down	0.95499	1	0.95499	hsa-miR-429	up	MBNL1-AS1	down
hsa-miR-429	up	PPP1R12B	down	PPP1R12B	protein_coding	down	HAND2-AS1	lincRNA	down	0.852392	1	0.852392	hsa-miR-429	up	HAND2-AS1	down
hsa-miR-429	up	PPP1R12B	down	PPP1R12B	protein_coding	down	AC036108.3	lincRNA	down	0.928092	1	0.928092	hsa-miR-429	up	AC036108.3	down
hsa-miR-429	up	PPP1R12B	down	PPP1R12B	protein_coding	down	AL513217.1	lincRNA	down	0.865747	1	0.865747	hsa-miR-429	up	AL513217.1	down
hsa-miR-17-3p	up	PPP1R12B	down	PPP1R12B	protein_coding	down	MBNL1-AS1	lincRNA	down	0.95499	1	0.95499	hsa-miR-17-3p	up	MBNL1-AS1	down
hsa-miR-17-3p	up	PPP1R12B	down	PPP1R12B	protein_coding	down	HAND2-AS1	lincRNA	down	0.852392	1	0.852392	hsa-miR-17-3p	up	HAND2-AS1	down
hsa-miR-17-3p	up	PPP1R12B	down	PPP1R12B	protein_coding	down	AC036108.3	lincRNA	down	0.928092	1	0.928092	hsa-miR-17-3p	up	AC036108.3	down
hsa-miR-17-3p	up	PPP1R12B	down	PPP1R12B	protein_coding	down	FENDRR	lincRNA	down	0.857263	1	0.857263	hsa-miR-17-3p	up	FENDRR	down
hsa-miR-17-3p	up	PPP1R12B	down	PPP1R12B	protein_coding	down	AC009102.2	lincRNA	down	0.89481	1	0.89481	hsa-miR-17-3p	up	AC009102.2	down
hsa-miR-182-5p	up	PRIMA1	down	PRIMA1	protein_coding	down	HAND2-AS1	lincRNA	down	0.86765	1	0.86765	hsa-miR-182-5p	up	HAND2-AS1	down
hsa-miR-24-3p	up	PRIMA1	down	PRIMA1	protein_coding	down	HAND2-AS1	lincRNA	down	0.86765	1	0.86765	hsa-miR-24-3p	up	HAND2-AS1	down
hsa-let-7g-3p	up	PRIMA1	down	PRIMA1	protein_coding	down	HAND2-AS1	lincRNA	down	0.86765	1	0.86765	hsa-let-7g-3p	up	HAND2-AS1	down
hsa-miR-182-5p	up	PRRG3	down	PRRG3	protein_coding	down	PGM5P4-AS1	lincRNA	down	0.926741	1	0.926741	hsa-miR-182-5p	up	PGM5P4-AS1	down
hsa-miR-182-5p	up	PRRG3	down	PRRG3	protein_coding	down	GPRACR	lincRNA	down	0.945281	1	0.945281	hsa-miR-182-5p	up	GPRACR	down
hsa-miR-182-5p	up	PRRG3	down	PRRG3	protein_coding	down	LINC02554	lincRNA	down	0.949399	1	0.949399	hsa-miR-182-5p	up	LINC02554	down
hsa-miR-182-5p	up	PRRG3	down	PRRG3	protein_coding	down	LINC01907	lincRNA	down	0.9107	1	0.9107	hsa-miR-182-5p	up	LINC01907	down
hsa-miR-182-5p	up	PRRG3	down	PRRG3	protein_coding	down	AQP4-AS1	lincRNA	down	0.872616	1	0.872616	hsa-miR-182-5p	up	AQP4-AS1	down
hsa-miR-17-5p	up	PSD	down	PSD	protein_coding	down	MBNL1-AS1	lincRNA	down	0.867973	1	0.867973	hsa-miR-17-5p	up	MBNL1-AS1	down
hsa-miR-17-5p	up	PSD	down	PSD	protein_coding	down	HAND2-AS1	lincRNA	down	0.887358	1	0.887358	hsa-miR-17-5p	up	HAND2-AS1	down
hsa-miR-20a-5p	up	PSD	down	PSD	protein_coding	down	MBNL1-AS1	lincRNA	down	0.867973	1	0.867973	hsa-miR-20a-5p	up	MBNL1-AS1	down
hsa-miR-20a-5p	up	PSD	down	PSD	protein_coding	down	HAND2-AS1	lincRNA	down	0.887358	1	0.887358	hsa-miR-20a-5p	up	HAND2-AS1	down
hsa-miR-106a-5p	up	PSD	down	PSD	protein_coding	down	MBNL1-AS1	lincRNA	down	0.867973	1	0.867973	hsa-miR-106a-5p	up	MBNL1-AS1	down
hsa-miR-106a-5p	up	PSD	down	PSD	protein_coding	down	HAND2-AS1	lincRNA	down	0.887358	1	0.887358	hsa-miR-106a-5p	up	HAND2-AS1	down
hsa-miR-106b-5p	up	PSD	down	PSD	protein_coding	down	MBNL1-AS1	lincRNA	down	0.867973	1	0.867973	hsa-miR-106b-5p	up	MBNL1-AS1	down
hsa-miR-106b-5p	up	PSD	down	PSD	protein_coding	down	HAND2-AS1	lincRNA	down	0.887358	1	0.887358	hsa-miR-106b-5p	up	HAND2-AS1	down
hsa-miR-106b-5p	up	PSD	down	PSD	protein_coding	down	AC010776.2	lincRNA	down	0.884343	1	0.884343	hsa-miR-106b-5p	up	AC010776.2	down
hsa-miR-130a-3p	up	PSD	down	PSD	protein_coding	down	MBNL1-AS1	lincRNA	down	0.867973	1	0.867973	hsa-miR-130a-3p	up	MBNL1-AS1	down
hsa-miR-130a-3p	up	PSD	down	PSD	protein_coding	down	HAND2-AS1	lincRNA	down	0.887358	1	0.887358	hsa-miR-130a-3p	up	HAND2-AS1	down
hsa-miR-22-3p	up	PTGS1	down	PTGS1	protein_coding	down	HAND2-AS1	lincRNA	down	0.869836	1	0.869836	hsa-miR-22-3p	up	HAND2-AS1	down
hsa-let-7a-5p	down	PXT1	up	PXT1	protein_coding	up	AC005264.1	lincRNA	up	0.875807	1	0.875807	hsa-let-7a-5p	down	AC005264.1	up
hsa-let-7a-5p	down	PXT1	up	PXT1	protein_coding	up	AL022322.2	lincRNA	up	0.8552	1	0.8552	hsa-let-7a-5p	down	AL022322.2	up
hsa-let-7a-5p	down	PXT1	up	PXT1	protein_coding	up	AC135012.1	lincRNA	up	0.852526	1	0.852526	hsa-let-7a-5p	down	AC135012.1	up
hsa-let-7a-5p	down	PXT1	up	PXT1	protein_coding	up	AC005304.2	lincRNA	up	0.916976	1	0.916976	hsa-let-7a-5p	down	AC005304.2	up
hsa-let-7a-5p	down	PXT1	up	PXT1	protein_coding	up	AL356753.1	lincRNA	up	0.935344	1	0.935344	hsa-let-7a-5p	down	AL356753.1	up
hsa-let-7b-5p	down	PXT1	up	PXT1	protein_coding	up	AC005264.1	lincRNA	up	0.875807	1	0.875807	hsa-let-7b-5p	down	AC005264.1	up
hsa-let-7b-5p	down	PXT1	up	PXT1	protein_coding	up	AL022322.2	lincRNA	up	0.8552	1	0.8552	hsa-let-7b-5p	down	AL022322.2	up
hsa-let-7b-5p	down	PXT1	up	PXT1	protein_coding	up	AC135012.1	lincRNA	up	0.852526	1	0.852526	hsa-let-7b-5p	down	AC135012.1	up
hsa-let-7b-5p	down	PXT1	up	PXT1	protein_coding	up	AC005304.2	lincRNA	up	0.916976	1	0.916976	hsa-let-7b-5p	down	AC005304.2	up
hsa-let-7b-5p	down	PXT1	up	PXT1	protein_coding	up	AL356753.1	lincRNA	up	0.935344	1	0.935344	hsa-let-7b-5p	down	AL356753.1	up
hsa-let-7c-5p	down	PXT1	up	PXT1	protein_coding	up	AC005264.1	lincRNA	up	0.875807	1	0.875807	hsa-let-7c-5p	down	AC005264.1	up
hsa-let-7c-5p	down	PXT1	up	PXT1	protein_coding	up	AL022322.2	lincRNA	up	0.8552	1	0.8552	hsa-let-7c-5p	down	AL022322.2	up
hsa-let-7c-5p	down	PXT1	up	PXT1	protein_coding	up	AC135012.1	lincRNA	up	0.852526	1	0.852526	hsa-let-7c-5p	down	AC135012.1	up
hsa-let-7c-5p	down	PXT1	up	PXT1	protein_coding	up	AC005304.2	lincRNA	up	0.916976	1	0.916976	hsa-let-7c-5p	down	AC005304.2	up
hsa-let-7c-5p	down	PXT1	up	PXT1	protein_coding	up	AL356753.1	lincRNA	up	0.935344	1	0.935344	hsa-let-7c-5p	down	AL356753.1	up
hsa-let-7e-5p	down	PXT1	up	PXT1	protein_coding	up	AC005264.1	lincRNA	up	0.875807	1	0.875807	hsa-let-7e-5p	down	AC005264.1	up
hsa-let-7e-5p	down	PXT1	up	PXT1	protein_coding	up	AL022322.2	lincRNA	up	0.8552	1	0.8552	hsa-let-7e-5p	down	AL022322.2	up
hsa-let-7e-5p	down	PXT1	up	PXT1	protein_coding	up	AC135012.1	lincRNA	up	0.852526	1	0.852526	hsa-let-7e-5p	down	AC135012.1	up
hsa-let-7e-5p	down	PXT1	up	PXT1	protein_coding	up	AC005304.2	lincRNA	up	0.916976	1	0.916976	hsa-let-7e-5p	down	AC005304.2	up
hsa-let-7e-5p	down	PXT1	up	PXT1	protein_coding	up	AL356753.1	lincRNA	up	0.935344	1	0.935344	hsa-let-7e-5p	down	AL356753.1	up
hsa-miR-17-5p	up	RASL12	down	RASL12	protein_coding	down	FENDRR	lincRNA	down	0.860051	1	0.860051	hsa-miR-17-5p	up	FENDRR	down
hsa-miR-20a-5p	up	RASL12	down	RASL12	protein_coding	down	FENDRR	lincRNA	down	0.860051	1	0.860051	hsa-miR-20a-5p	up	FENDRR	down
hsa-miR-106a-5p	up	RASL12	down	RASL12	protein_coding	down	FENDRR	lincRNA	down	0.860051	1	0.860051	hsa-miR-106a-5p	up	FENDRR	down
hsa-miR-106b-5p	up	RASL12	down	RASL12	protein_coding	down	FENDRR	lincRNA	down	0.860051	1	0.860051	hsa-miR-106b-5p	up	FENDRR	down
hsa-miR-17-3p	up	RASL12	down	RASL12	protein_coding	down	FENDRR	lincRNA	down	0.860051	1	0.860051	hsa-miR-17-3p	up	FENDRR	down
hsa-miR-21-5p	up	RBMS3	down	RBMS3	protein_coding	down	RBMS3-AS3	lincRNA	down	0.868252	1	0.868252	hsa-miR-21-5p	up	RBMS3-AS3	down
hsa-miR-21-5p	up	RBMS3	down	RBMS3	protein_coding	down	ADAMTS9-AS2	lincRNA	down	0.919847	1	0.919847	hsa-miR-21-5p	up	ADAMTS9-AS2	down
hsa-miR-21-5p	up	RBMS3	down	RBMS3	protein_coding	down	LINC01266	lincRNA	down	0.877932	1	0.877932	hsa-miR-21-5p	up	LINC01266	down
hsa-miR-22-5p	up	RBMS3	down	RBMS3	protein_coding	down	RBMS3-AS3	lincRNA	down	0.868252	1	0.868252	hsa-miR-22-5p	up	RBMS3-AS3	down
hsa-miR-22-5p	up	RBMS3	down	RBMS3	protein_coding	down	ADAMTS9-AS2	lincRNA	down	0.919847	1	0.919847	hsa-miR-22-5p	up	ADAMTS9-AS2	down
hsa-miR-22-5p	up	RBMS3	down	RBMS3	protein_coding	down	AC092376.2	lincRNA	down	0.903165	1	0.903165	hsa-miR-22-5p	up	AC092376.2	down
hsa-miR-22-5p	up	RBMS3	down	RBMS3	protein_coding	down	LINC01798	lincRNA	down	0.863333	1	0.863333	hsa-miR-22-5p	up	LINC01798	down
hsa-miR-10a-5p	up	RBMS3	down	RBMS3	protein_coding	down	ADAMTS9-AS2	lincRNA	down	0.919847	1	0.919847	hsa-miR-10a-5p	up	ADAMTS9-AS2	down
hsa-miR-10a-5p	up	RBMS3	down	RBMS3	protein_coding	down	LINC01266	lincRNA	down	0.877932	1	0.877932	hsa-miR-10a-5p	up	LINC01266	down
hsa-miR-10b-5p	up	RBMS3	down	RBMS3	protein_coding	down	ADAMTS9-AS2	lincRNA	down	0.919847	1	0.919847	hsa-miR-10b-5p	up	ADAMTS9-AS2	down
hsa-miR-10b-5p	up	RBMS3	down	RBMS3	protein_coding	down	LINC01266	lincRNA	down	0.877932	1	0.877932	hsa-miR-10b-5p	up	LINC01266	down
hsa-miR-9-5p	up	RBMS3	down	RBMS3	protein_coding	down	ADAMTS9-AS2	lincRNA	down	0.919847	1	0.919847	hsa-miR-9-5p	up	ADAMTS9-AS2	down
hsa-miR-9-5p	up	RBMS3	down	RBMS3	protein_coding	down	LINC01266	lincRNA	down	0.877932	1	0.877932	hsa-miR-9-5p	up	LINC01266	down
hsa-miR-576-5p	up	RBMS3	down	RBMS3	protein_coding	down	RBMS3-AS3	lincRNA	down	0.868252	1	0.868252	hsa-miR-576-5p	up	RBMS3-AS3	down
hsa-miR-576-5p	up	RBMS3	down	RBMS3	protein_coding	down	ADAMTS9-AS2	lincRNA	down	0.919847	1	0.919847	hsa-miR-576-5p	up	ADAMTS9-AS2	down
hsa-miR-576-5p	up	RBMS3	down	RBMS3	protein_coding	down	AC092376.2	lincRNA	down	0.903165	1	0.903165	hsa-miR-576-5p	up	AC092376.2	down
hsa-miR-576-5p	up	RBMS3	down	RBMS3	protein_coding	down	LINC01798	lincRNA	down	0.863333	1	0.863333	hsa-miR-576-5p	up	LINC01798	down
hsa-miR-21-3p	up	RBMS3	down	RBMS3	protein_coding	down	ADAMTS9-AS2	lincRNA	down	0.919847	1	0.919847	hsa-miR-21-3p	up	ADAMTS9-AS2	down
hsa-miR-21-3p	up	RBMS3	down	RBMS3	protein_coding	down	LINC01798	lincRNA	down	0.863333	1	0.863333	hsa-miR-21-3p	up	LINC01798	down
hsa-miR-335-3p	up	RBMS3	down	RBMS3	protein_coding	down	RBMS3-AS3	lincRNA	down	0.868252	1	0.868252	hsa-miR-335-3p	up	RBMS3-AS3	down
hsa-miR-335-3p	up	RBMS3	down	RBMS3	protein_coding	down	ADAMTS9-AS2	lincRNA	down	0.919847	1	0.919847	hsa-miR-335-3p	up	ADAMTS9-AS2	down
hsa-miR-335-3p	up	RBMS3	down	RBMS3	protein_coding	down	AC092376.2	lincRNA	down	0.903165	1	0.903165	hsa-miR-335-3p	up	AC092376.2	down
hsa-miR-335-3p	up	RBMS3	down	RBMS3	protein_coding	down	LINC01798	lincRNA	down	0.863333	1	0.863333	hsa-miR-335-3p	up	LINC01798	down
hsa-miR-335-3p	up	RBMS3	down	RBMS3	protein_coding	down	LINC01266	lincRNA	down	0.877932	1	0.877932	hsa-miR-335-3p	up	LINC01266	down
hsa-miR-27a-3p	up	RBPMS2	down	RBPMS2	protein_coding	down	MIR497HG	lincRNA	down	0.853631	1	0.853631	hsa-miR-27a-3p	up	MIR497HG	down
hsa-miR-27a-3p	up	RBPMS2	down	RBPMS2	protein_coding	down	MBNL1-AS1	lincRNA	down	0.910796	1	0.910796	hsa-miR-27a-3p	up	MBNL1-AS1	down
hsa-miR-27a-3p	up	RBPMS2	down	RBPMS2	protein_coding	down	HAND2-AS1	lincRNA	down	0.887915	1	0.887915	hsa-miR-27a-3p	up	HAND2-AS1	down
hsa-miR-27a-3p	up	RBPMS2	down	RBPMS2	protein_coding	down	FENDRR	lincRNA	down	0.869916	1	0.869916	hsa-miR-27a-3p	up	FENDRR	down
hsa-miR-27a-3p	up	RBPMS2	down	RBPMS2	protein_coding	down	MIR1-1HG-AS1	lincRNA	down	0.874006	1	0.874006	hsa-miR-27a-3p	up	MIR1-1HG-AS1	down
hsa-miR-199b-5p	up	REEP2	down	REEP2	protein_coding	down	MIR1-1HG-AS1	lincRNA	down	0.896412	1	0.896412	hsa-miR-199b-5p	up	MIR1-1HG-AS1	down
hsa-miR-24-3p	up	REEP2	down	REEP2	protein_coding	down	MIR1-1HG-AS1	lincRNA	down	0.896412	1	0.896412	hsa-miR-24-3p	up	MIR1-1HG-AS1	down
hsa-miR-24-3p	up	REEP2	down	REEP2	protein_coding	down	AL513217.1	lincRNA	down	0.85909	1	0.85909	hsa-miR-24-3p	up	AL513217.1	down
hsa-miR-28-5p	up	RNF150	down	RNF150	protein_coding	down	MBNL1-AS1	lincRNA	down	0.930218	1	0.930218	hsa-miR-28-5p	up	MBNL1-AS1	down
hsa-miR-28-5p	up	RNF150	down	RNF150	protein_coding	down	HAND2-AS1	lincRNA	down	0.900384	1	0.900384	hsa-miR-28-5p	up	HAND2-AS1	down
hsa-miR-28-5p	up	RNF150	down	RNF150	protein_coding	down	AF001548.1	lincRNA	down	0.88196	1	0.88196	hsa-miR-28-5p	up	AF001548.1	down
hsa-miR-28-5p	up	RNF150	down	RNF150	protein_coding	down	AL356489.2	lincRNA	down	0.900709	1	0.900709	hsa-miR-28-5p	up	AL356489.2	down
hsa-miR-9-5p	up	RNF150	down	RNF150	protein_coding	down	MBNL1-AS1	lincRNA	down	0.930218	1	0.930218	hsa-miR-9-5p	up	MBNL1-AS1	down
hsa-miR-9-5p	up	RNF150	down	RNF150	protein_coding	down	HAND2-AS1	lincRNA	down	0.900384	1	0.900384	hsa-miR-9-5p	up	HAND2-AS1	down
hsa-miR-9-5p	up	RNF150	down	RNF150	protein_coding	down	AC009102.2	lincRNA	down	0.913974	1	0.913974	hsa-miR-9-5p	up	AC009102.2	down
hsa-let-7f-5p	up	RUNX1T1	down	RUNX1T1	protein_coding	down	ADAMTS9-AS2	lincRNA	down	0.890892	1	0.890892	hsa-let-7f-5p	up	ADAMTS9-AS2	down
hsa-let-7f-5p	up	RUNX1T1	down	RUNX1T1	protein_coding	down	AC092376.2	lincRNA	down	0.859419	1	0.859419	hsa-let-7f-5p	up	AC092376.2	down
hsa-miR-15a-5p	up	RUNX1T1	down	RUNX1T1	protein_coding	down	ADAMTS9-AS2	lincRNA	down	0.890892	1	0.890892	hsa-miR-15a-5p	up	ADAMTS9-AS2	down
hsa-miR-15a-5p	up	RUNX1T1	down	RUNX1T1	protein_coding	down	AC092376.2	lincRNA	down	0.859419	1	0.859419	hsa-miR-15a-5p	up	AC092376.2	down
hsa-miR-16-5p	up	RUNX1T1	down	RUNX1T1	protein_coding	down	AC092376.2	lincRNA	down	0.859419	1	0.859419	hsa-miR-16-5p	up	AC092376.2	down
hsa-miR-98-5p	up	RUNX1T1	down	RUNX1T1	protein_coding	down	ADAMTS9-AS2	lincRNA	down	0.890892	1	0.890892	hsa-miR-98-5p	up	ADAMTS9-AS2	down
hsa-miR-192-5p	up	RUNX1T1	down	RUNX1T1	protein_coding	down	ADAMTS9-AS2	lincRNA	down	0.890892	1	0.890892	hsa-miR-192-5p	up	ADAMTS9-AS2	down
hsa-miR-192-5p	up	RUNX1T1	down	RUNX1T1	protein_coding	down	AC092376.2	lincRNA	down	0.859419	1	0.859419	hsa-miR-192-5p	up	AC092376.2	down
hsa-miR-199b-5p	up	RUNX1T1	down	RUNX1T1	protein_coding	down	ADAMTS9-AS2	lincRNA	down	0.890892	1	0.890892	hsa-miR-199b-5p	up	ADAMTS9-AS2	down
hsa-miR-199b-5p	up	RUNX1T1	down	RUNX1T1	protein_coding	down	AC092376.2	lincRNA	down	0.859419	1	0.859419	hsa-miR-199b-5p	up	AC092376.2	down
hsa-miR-215-5p	up	RUNX1T1	down	RUNX1T1	protein_coding	down	ADAMTS9-AS2	lincRNA	down	0.890892	1	0.890892	hsa-miR-215-5p	up	ADAMTS9-AS2	down
hsa-miR-215-5p	up	RUNX1T1	down	RUNX1T1	protein_coding	down	AC092376.2	lincRNA	down	0.859419	1	0.859419	hsa-miR-215-5p	up	AC092376.2	down
hsa-let-7g-5p	up	RUNX1T1	down	RUNX1T1	protein_coding	down	ADAMTS9-AS2	lincRNA	down	0.890892	1	0.890892	hsa-let-7g-5p	up	ADAMTS9-AS2	down
hsa-let-7g-5p	up	RUNX1T1	down	RUNX1T1	protein_coding	down	AC092376.2	lincRNA	down	0.859419	1	0.859419	hsa-let-7g-5p	up	AC092376.2	down
hsa-let-7g-5p	up	RUNX1T1	down	RUNX1T1	protein_coding	down	BNC2-AS1	lincRNA	down	0.882088	1	0.882088	hsa-let-7g-5p	up	BNC2-AS1	down
hsa-miR-126-5p	up	RUNX1T1	down	RUNX1T1	protein_coding	down	ADAMTS9-AS2	lincRNA	down	0.890892	1	0.890892	hsa-miR-126-5p	up	ADAMTS9-AS2	down
hsa-miR-146a-5p	up	RUNX1T1	down	RUNX1T1	protein_coding	down	ADAMTS9-AS2	lincRNA	down	0.890892	1	0.890892	hsa-miR-146a-5p	up	ADAMTS9-AS2	down
hsa-miR-429	up	RUNX1T1	down	RUNX1T1	protein_coding	down	AC092376.2	lincRNA	down	0.859419	1	0.859419	hsa-miR-429	up	AC092376.2	down
hsa-miR-146b-5p	up	RUNX1T1	down	RUNX1T1	protein_coding	down	ADAMTS9-AS2	lincRNA	down	0.890892	1	0.890892	hsa-miR-146b-5p	up	ADAMTS9-AS2	down
hsa-miR-146b-5p	up	RUNX1T1	down	RUNX1T1	protein_coding	down	AC092376.2	lincRNA	down	0.859419	1	0.859419	hsa-miR-146b-5p	up	AC092376.2	down
hsa-miR-21-3p	up	RUNX1T1	down	RUNX1T1	protein_coding	down	ADAMTS9-AS2	lincRNA	down	0.890892	1	0.890892	hsa-miR-21-3p	up	ADAMTS9-AS2	down
hsa-miR-29b-3p	up	RUNX1T1	down	RUNX1T1	protein_coding	down	ADAMTS9-AS2	lincRNA	down	0.890892	1	0.890892	hsa-miR-29b-3p	up	ADAMTS9-AS2	down
hsa-miR-29b-3p	up	RUNX1T1	down	RUNX1T1	protein_coding	down	AC092376.2	lincRNA	down	0.859419	1	0.859419	hsa-miR-29b-3p	up	AC092376.2	down
hsa-miR-148a-3p	up	RUNX1T1	down	RUNX1T1	protein_coding	down	ADAMTS9-AS2	lincRNA	down	0.890892	1	0.890892	hsa-miR-148a-3p	up	ADAMTS9-AS2	down
hsa-miR-152-3p	up	RUNX1T1	down	RUNX1T1	protein_coding	down	ADAMTS9-AS2	lincRNA	down	0.890892	1	0.890892	hsa-miR-152-3p	up	ADAMTS9-AS2	down
hsa-miR-335-3p	up	RUNX1T1	down	RUNX1T1	protein_coding	down	ADAMTS9-AS2	lincRNA	down	0.890892	1	0.890892	hsa-miR-335-3p	up	ADAMTS9-AS2	down
hsa-miR-335-3p	up	RUNX1T1	down	RUNX1T1	protein_coding	down	AC092376.2	lincRNA	down	0.859419	1	0.859419	hsa-miR-335-3p	up	AC092376.2	down
hsa-miR-34a-5p	up	SCN2B	down	SCN2B	protein_coding	down	HAND2-AS1	lincRNA	down	0.888439	1	0.888439	hsa-miR-34a-5p	up	HAND2-AS1	down
hsa-miR-374b-5p	up	SCN2B	down	SCN2B	protein_coding	down	HAND2-AS1	lincRNA	down	0.888439	1	0.888439	hsa-miR-374b-5p	up	HAND2-AS1	down
hsa-miR-141-3p	up	SCN7A	down	SCN7A	protein_coding	down	MBNL1-AS1	lincRNA	down	0.878479	1	0.878479	hsa-miR-141-3p	up	MBNL1-AS1	down
hsa-miR-141-3p	up	SCN7A	down	SCN7A	protein_coding	down	HAND2-AS1	lincRNA	down	0.963269	1	0.963269	hsa-miR-141-3p	up	HAND2-AS1	down
hsa-miR-141-3p	up	SCN7A	down	SCN7A	protein_coding	down	AC010776.2	lincRNA	down	0.887572	1	0.887572	hsa-miR-141-3p	up	AC010776.2	down
hsa-miR-141-3p	up	SCN7A	down	SCN7A	protein_coding	down	AC110491.1	lincRNA	down	0.879792	1	0.879792	hsa-miR-141-3p	up	AC110491.1	down
hsa-miR-200a-3p	up	SCN7A	down	SCN7A	protein_coding	down	MIR497HG	lincRNA	down	0.861	1	0.861	hsa-miR-200a-3p	up	MIR497HG	down
hsa-miR-200a-3p	up	SCN7A	down	SCN7A	protein_coding	down	MBNL1-AS1	lincRNA	down	0.878479	1	0.878479	hsa-miR-200a-3p	up	MBNL1-AS1	down
hsa-miR-200a-3p	up	SCN7A	down	SCN7A	protein_coding	down	HAND2-AS1	lincRNA	down	0.963269	1	0.963269	hsa-miR-200a-3p	up	HAND2-AS1	down
hsa-miR-200a-3p	up	SCN7A	down	SCN7A	protein_coding	down	AC010776.2	lincRNA	down	0.887572	1	0.887572	hsa-miR-200a-3p	up	AC010776.2	down
hsa-miR-200a-3p	up	SCN7A	down	SCN7A	protein_coding	down	AC110491.1	lincRNA	down	0.879792	1	0.879792	hsa-miR-200a-3p	up	AC110491.1	down
hsa-miR-9-5p	up	SEZ6	down	SEZ6	protein_coding	down	AC022893.2	lincRNA	down	0.869275	1	0.869275	hsa-miR-9-5p	up	AC022893.2	down
hsa-miR-9-5p	up	SEZ6	down	SEZ6	protein_coding	down	LINC02078	lincRNA	down	0.917735	1	0.917735	hsa-miR-9-5p	up	LINC02078	down
hsa-miR-140-3p	down	SGIP1	up	SGIP1	protein_coding	up	SLC8A1-AS1	lincRNA	up	0.91134	1	0.91134	hsa-miR-140-3p	down	SLC8A1-AS1	up
hsa-miR-140-3p	down	SGIP1	up	SGIP1	protein_coding	up	ST7-AS2	lincRNA	up	0.873191	1	0.873191	hsa-miR-140-3p	down	ST7-AS2	up
hsa-miR-140-3p	down	SGIP1	up	SGIP1	protein_coding	up	ZBTB20-AS1	lincRNA	up	0.864292	1	0.864292	hsa-miR-140-3p	down	ZBTB20-AS1	up
hsa-miR-140-3p	down	SGIP1	up	SGIP1	protein_coding	up	HMGA2-AS1	lincRNA	up	0.860422	1	0.860422	hsa-miR-140-3p	down	HMGA2-AS1	up
hsa-miR-140-3p	down	SGIP1	up	SGIP1	protein_coding	up	CASC15	lincRNA	up	0.878161	1	0.878161	hsa-miR-140-3p	down	CASC15	up
hsa-miR-140-3p	down	SGIP1	up	SGIP1	protein_coding	up	PLCG1-AS1	lincRNA	up	0.856329	1	0.856329	hsa-miR-140-3p	down	PLCG1-AS1	up
hsa-miR-140-3p	down	SGIP1	up	SGIP1	protein_coding	up	AL359094.1	lincRNA	up	0.85144	1	0.85144	hsa-miR-140-3p	down	AL359094.1	up
hsa-miR-140-3p	down	SGIP1	up	SGIP1	protein_coding	up	AC010401.1	lincRNA	up	0.882468	1	0.882468	hsa-miR-140-3p	down	AC010401.1	up
hsa-miR-140-3p	down	SGIP1	up	SGIP1	protein_coding	up	AC110048.2	lincRNA	up	0.881272	1	0.881272	hsa-miR-140-3p	down	AC110048.2	up
hsa-miR-140-3p	down	SGIP1	up	SGIP1	protein_coding	up	NBAT1	lincRNA	up	0.87812	1	0.87812	hsa-miR-140-3p	down	NBAT1	up
hsa-miR-140-3p	down	SGIP1	up	SGIP1	protein_coding	up	AL357568.1	lincRNA	up	0.868782	1	0.868782	hsa-miR-140-3p	down	AL357568.1	up
hsa-miR-140-3p	down	SGIP1	up	SGIP1	protein_coding	up	AC116158.1	lincRNA	up	0.880798	1	0.880798	hsa-miR-140-3p	down	AC116158.1	up
hsa-miR-140-3p	down	SGIP1	up	SGIP1	protein_coding	up	AC090337.1	lincRNA	up	0.907165	1	0.907165	hsa-miR-140-3p	down	AC090337.1	up
hsa-miR-140-3p	down	SGIP1	up	SGIP1	protein_coding	up	CYYR1-AS1	lincRNA	up	0.859091	1	0.859091	hsa-miR-140-3p	down	CYYR1-AS1	up
hsa-miR-200c-3p	down	SGIP1	up	SGIP1	protein_coding	up	ZBTB20-AS1	lincRNA	up	0.864292	1	0.864292	hsa-miR-200c-3p	down	ZBTB20-AS1	up
hsa-miR-200c-3p	down	SGIP1	up	SGIP1	protein_coding	up	CASC15	lincRNA	up	0.878161	1	0.878161	hsa-miR-200c-3p	down	CASC15	up
hsa-miR-200c-3p	down	SGIP1	up	SGIP1	protein_coding	up	PLCG1-AS1	lincRNA	up	0.856329	1	0.856329	hsa-miR-200c-3p	down	PLCG1-AS1	up
hsa-miR-200c-3p	down	SGIP1	up	SGIP1	protein_coding	up	AC108463.3	lincRNA	up	0.879302	1	0.879302	hsa-miR-200c-3p	down	AC108463.3	up
hsa-miR-200c-3p	down	SGIP1	up	SGIP1	protein_coding	up	AC007336.1	lincRNA	up	0.863667	1	0.863667	hsa-miR-200c-3p	down	AC007336.1	up
hsa-miR-200c-3p	down	SGIP1	up	SGIP1	protein_coding	up	AC010401.1	lincRNA	up	0.882468	1	0.882468	hsa-miR-200c-3p	down	AC010401.1	up
hsa-miR-200c-3p	down	SGIP1	up	SGIP1	protein_coding	up	AC010285.1	lincRNA	up	0.859995	1	0.859995	hsa-miR-200c-3p	down	AC010285.1	up
hsa-miR-200c-3p	down	SGIP1	up	SGIP1	protein_coding	up	DOCK4-AS1	lincRNA	up	0.851533	1	0.851533	hsa-miR-200c-3p	down	DOCK4-AS1	up
hsa-miR-200c-3p	down	SGIP1	up	SGIP1	protein_coding	up	AC110792.2	lincRNA	up	0.884617	1	0.884617	hsa-miR-200c-3p	down	AC110792.2	up
hsa-miR-200c-3p	down	SGIP1	up	SGIP1	protein_coding	up	AL360091.3	lincRNA	up	0.863845	1	0.863845	hsa-miR-200c-3p	down	AL360091.3	up
hsa-miR-200c-3p	down	SGIP1	up	SGIP1	protein_coding	up	CACNA1C-AS4	lincRNA	up	0.857047	1	0.857047	hsa-miR-200c-3p	down	CACNA1C-AS4	up
hsa-miR-200c-3p	down	SGIP1	up	SGIP1	protein_coding	up	AL357568.1	lincRNA	up	0.868782	1	0.868782	hsa-miR-200c-3p	down	AL357568.1	up
hsa-miR-200c-3p	down	SGIP1	up	SGIP1	protein_coding	up	PRKG1-AS1	lincRNA	up	0.850024	1	0.850024	hsa-miR-200c-3p	down	PRKG1-AS1	up
hsa-miR-200c-3p	down	SGIP1	up	SGIP1	protein_coding	up	AC024475.1	lincRNA	up	0.893296	1	0.893296	hsa-miR-200c-3p	down	AC024475.1	up
hsa-miR-200c-3p	down	SGIP1	up	SGIP1	protein_coding	up	AC090337.1	lincRNA	up	0.907165	1	0.907165	hsa-miR-200c-3p	down	AC090337.1	up
hsa-miR-200c-3p	down	SGIP1	up	SGIP1	protein_coding	up	AP005131.1	lincRNA	up	0.853612	1	0.853612	hsa-miR-200c-3p	down	AP005131.1	up
hsa-miR-200c-3p	down	SGIP1	up	SGIP1	protein_coding	up	MYLK-AS2	lincRNA	up	0.878331	1	0.878331	hsa-miR-200c-3p	down	MYLK-AS2	up
hsa-miR-34a-5p	up	SHISA7	down	SHISA7	protein_coding	down	MIR7-3HG	lincRNA	down	0.955715	1	0.955715	hsa-miR-34a-5p	up	MIR7-3HG	down
hsa-let-7f-5p	up	SLC30A4	down	SLC30A4	protein_coding	down	MIR133A1HG	lincRNA	down	0.899602	1	0.899602	hsa-let-7f-5p	up	MIR133A1HG	down
hsa-miR-98-5p	up	SLC30A4	down	SLC30A4	protein_coding	down	AC133644.2	lincRNA	down	0.882352	1	0.882352	hsa-miR-98-5p	up	AC133644.2	down
hsa-miR-98-5p	up	SLC30A4	down	SLC30A4	protein_coding	down	MIR133A1HG	lincRNA	down	0.899602	1	0.899602	hsa-miR-98-5p	up	MIR133A1HG	down
hsa-let-7g-5p	up	SLC30A4	down	SLC30A4	protein_coding	down	AC133644.2	lincRNA	down	0.882352	1	0.882352	hsa-let-7g-5p	up	AC133644.2	down
hsa-let-7g-5p	up	SLC30A4	down	SLC30A4	protein_coding	down	MIR133A1HG	lincRNA	down	0.899602	1	0.899602	hsa-let-7g-5p	up	MIR133A1HG	down
hsa-miR-30b-5p	up	SLC30A4	down	SLC30A4	protein_coding	down	AC133644.2	lincRNA	down	0.882352	1	0.882352	hsa-miR-30b-5p	up	AC133644.2	down
hsa-miR-30b-5p	up	SLC30A4	down	SLC30A4	protein_coding	down	MIR133A1HG	lincRNA	down	0.899602	1	0.899602	hsa-miR-30b-5p	up	MIR133A1HG	down
hsa-miR-30e-5p	up	SLC30A4	down	SLC30A4	protein_coding	down	AC133644.2	lincRNA	down	0.882352	1	0.882352	hsa-miR-30e-5p	up	AC133644.2	down
hsa-miR-30e-5p	up	SLC30A4	down	SLC30A4	protein_coding	down	MIR133A1HG	lincRNA	down	0.899602	1	0.899602	hsa-miR-30e-5p	up	MIR133A1HG	down
hsa-miR-182-5p	up	SLC4A1	down	SLC4A1	protein_coding	down	PGM5P4-AS1	lincRNA	down	0.870232	1	0.870232	hsa-miR-182-5p	up	PGM5P4-AS1	down
hsa-miR-182-5p	up	SLC4A1	down	SLC4A1	protein_coding	down	GPRACR	lincRNA	down	0.873604	1	0.873604	hsa-miR-182-5p	up	GPRACR	down
hsa-miR-182-5p	up	SLC4A1	down	SLC4A1	protein_coding	down	LINC02554	lincRNA	down	0.910142	1	0.910142	hsa-miR-182-5p	up	LINC02554	down
hsa-miR-182-5p	up	SLC4A1	down	SLC4A1	protein_coding	down	LINC01907	lincRNA	down	0.906838	1	0.906838	hsa-miR-182-5p	up	LINC01907	down
hsa-miR-182-5p	up	SLC4A1	down	SLC4A1	protein_coding	down	AQP4-AS1	lincRNA	down	0.886555	1	0.886555	hsa-miR-182-5p	up	AQP4-AS1	down
hsa-miR-9-5p	up	SLC4A1	down	SLC4A1	protein_coding	down	PGM5P4-AS1	lincRNA	down	0.870232	1	0.870232	hsa-miR-9-5p	up	PGM5P4-AS1	down
hsa-miR-9-5p	up	SLC4A1	down	SLC4A1	protein_coding	down	LINC02554	lincRNA	down	0.910142	1	0.910142	hsa-miR-9-5p	up	LINC02554	down
hsa-miR-9-5p	up	SLC4A1	down	SLC4A1	protein_coding	down	LINC01907	lincRNA	down	0.906838	1	0.906838	hsa-miR-9-5p	up	LINC01907	down
hsa-miR-9-5p	up	SLC4A1	down	SLC4A1	protein_coding	down	AQP4-AS1	lincRNA	down	0.886555	1	0.886555	hsa-miR-9-5p	up	AQP4-AS1	down
hsa-miR-9-5p	up	SLC4A1	down	SLC4A1	protein_coding	down	AC139099.2	lincRNA	down	0.928548	1	0.928548	hsa-miR-9-5p	up	AC139099.2	down
hsa-miR-15a-5p	up	SLC4A4	down	SLC4A4	protein_coding	down	AC087379.1	lincRNA	down	0.877724	1	0.877724	hsa-miR-15a-5p	up	AC087379.1	down
hsa-miR-16-5p	up	SLC4A4	down	SLC4A4	protein_coding	down	AC087379.1	lincRNA	down	0.877724	1	0.877724	hsa-miR-16-5p	up	AC087379.1	down
hsa-miR-26a-5p	up	SLC4A4	down	SLC4A4	protein_coding	down	AC087379.1	lincRNA	down	0.877724	1	0.877724	hsa-miR-26a-5p	up	AC087379.1	down
hsa-miR-26b-5p	up	SLC4A4	down	SLC4A4	protein_coding	down	AC087379.1	lincRNA	down	0.877724	1	0.877724	hsa-miR-26b-5p	up	AC087379.1	down
hsa-miR-101-3p	up	SLC4A4	down	SLC4A4	protein_coding	down	AC087379.1	lincRNA	down	0.877724	1	0.877724	hsa-miR-101-3p	up	AC087379.1	down
hsa-miR-429	up	SLC4A4	down	SLC4A4	protein_coding	down	AC087379.1	lincRNA	down	0.877724	1	0.877724	hsa-miR-429	up	AC087379.1	down
hsa-let-7f-5p	up	SLC7A14	down	SLC7A14	protein_coding	down	AC022893.2	lincRNA	down	0.86527	1	0.86527	hsa-let-7f-5p	up	AC022893.2	down
hsa-miR-98-5p	up	SLC7A14	down	SLC7A14	protein_coding	down	AC022893.2	lincRNA	down	0.86527	1	0.86527	hsa-miR-98-5p	up	AC022893.2	down
hsa-miR-182-5p	up	SLC7A14	down	SLC7A14	protein_coding	down	AC022893.2	lincRNA	down	0.86527	1	0.86527	hsa-miR-182-5p	up	AC022893.2	down
hsa-let-7g-3p	up	SLC7A14	down	SLC7A14	protein_coding	down	AC022893.2	lincRNA	down	0.86527	1	0.86527	hsa-let-7g-3p	up	AC022893.2	down
hsa-miR-429	up	SLITRK1	down	SLITRK1	protein_coding	down	AC022893.2	lincRNA	down	0.901234	1	0.901234	hsa-miR-429	up	AC022893.2	down
hsa-miR-17-3p	up	SLITRK1	down	SLITRK1	protein_coding	down	AC022893.2	lincRNA	down	0.901234	1	0.901234	hsa-miR-17-3p	up	AC022893.2	down
hsa-miR-17-3p	up	SLITRK1	down	SLITRK1	protein_coding	down	LINC02078	lincRNA	down	0.872506	1	0.872506	hsa-miR-17-3p	up	LINC02078	down
hsa-miR-27a-3p	up	SLITRK1	down	SLITRK1	protein_coding	down	AC022893.2	lincRNA	down	0.901234	1	0.901234	hsa-miR-27a-3p	up	AC022893.2	down
hsa-miR-27a-3p	up	SLITRK1	down	SLITRK1	protein_coding	down	MIR7-3HG	lincRNA	down	0.938491	1	0.938491	hsa-miR-27a-3p	up	MIR7-3HG	down
hsa-miR-223-3p	up	SORBS1	down	SORBS1	protein_coding	down	MBNL1-AS1	lincRNA	down	0.91172	1	0.91172	hsa-miR-223-3p	up	MBNL1-AS1	down
hsa-miR-223-3p	up	SORBS1	down	SORBS1	protein_coding	down	AL356489.2	lincRNA	down	0.887225	1	0.887225	hsa-miR-223-3p	up	AL356489.2	down
hsa-let-7g-3p	up	SORBS1	down	SORBS1	protein_coding	down	AC009102.2	lincRNA	down	0.877951	1	0.877951	hsa-let-7g-3p	up	AC009102.2	down
hsa-let-7g-3p	up	SORBS1	down	SORBS1	protein_coding	down	AC002398.2	lincRNA	down	0.856463	1	0.856463	hsa-let-7g-3p	up	AC002398.2	down
hsa-let-7f-5p	up	SPEG	down	SPEG	protein_coding	down	MBNL1-AS1	lincRNA	down	0.865453	1	0.865453	hsa-let-7f-5p	up	MBNL1-AS1	down
hsa-let-7f-5p	up	SPEG	down	SPEG	protein_coding	down	AL356489.2	lincRNA	down	0.861675	1	0.861675	hsa-let-7f-5p	up	AL356489.2	down
hsa-miR-98-5p	up	SPEG	down	SPEG	protein_coding	down	MBNL1-AS1	lincRNA	down	0.865453	1	0.865453	hsa-miR-98-5p	up	MBNL1-AS1	down
hsa-miR-98-5p	up	SPEG	down	SPEG	protein_coding	down	AL356489.2	lincRNA	down	0.861675	1	0.861675	hsa-miR-98-5p	up	AL356489.2	down
hsa-let-7g-5p	up	SPEG	down	SPEG	protein_coding	down	MBNL1-AS1	lincRNA	down	0.865453	1	0.865453	hsa-let-7g-5p	up	MBNL1-AS1	down
hsa-miR-126-5p	up	SRRM4	down	SRRM4	protein_coding	down	AC022893.2	lincRNA	down	0.861389	1	0.861389	hsa-miR-126-5p	up	AC022893.2	down
hsa-miR-126-5p	up	SRRM4	down	SRRM4	protein_coding	down	MIR7-3HG	lincRNA	down	0.919338	1	0.919338	hsa-miR-126-5p	up	MIR7-3HG	down
hsa-miR-21-3p	up	SRRM4	down	SRRM4	protein_coding	down	AC022893.2	lincRNA	down	0.861389	1	0.861389	hsa-miR-21-3p	up	AC022893.2	down
hsa-miR-29b-3p	up	SVIL	down	SVIL	protein_coding	down	MBNL1-AS1	lincRNA	down	0.891901	1	0.891901	hsa-miR-29b-3p	up	MBNL1-AS1	down
hsa-miR-29b-3p	up	SVIL	down	SVIL	protein_coding	down	HAND2-AS1	lincRNA	down	0.864855	1	0.864855	hsa-miR-29b-3p	up	HAND2-AS1	down
hsa-miR-141-3p	up	SVIL	down	SVIL	protein_coding	down	MBNL1-AS1	lincRNA	down	0.891901	1	0.891901	hsa-miR-141-3p	up	MBNL1-AS1	down
hsa-miR-141-3p	up	SVIL	down	SVIL	protein_coding	down	HAND2-AS1	lincRNA	down	0.864855	1	0.864855	hsa-miR-141-3p	up	HAND2-AS1	down
hsa-miR-141-3p	up	SVIL	down	SVIL	protein_coding	down	AL513217.1	lincRNA	down	0.87365	1	0.87365	hsa-miR-141-3p	up	AL513217.1	down
hsa-miR-141-3p	up	SVIL	down	SVIL	protein_coding	down	AC002398.2	lincRNA	down	0.873532	1	0.873532	hsa-miR-141-3p	up	AC002398.2	down
hsa-miR-143-3p	up	SVIL	down	SVIL	protein_coding	down	HAND2-AS1	lincRNA	down	0.864855	1	0.864855	hsa-miR-143-3p	up	HAND2-AS1	down
hsa-miR-143-3p	up	SVIL	down	SVIL	protein_coding	down	AL356489.2	lincRNA	down	0.857238	1	0.857238	hsa-miR-143-3p	up	AL356489.2	down
hsa-miR-29c-3p	up	SVIL	down	SVIL	protein_coding	down	MBNL1-AS1	lincRNA	down	0.891901	1	0.891901	hsa-miR-29c-3p	up	MBNL1-AS1	down
hsa-miR-29c-3p	up	SVIL	down	SVIL	protein_coding	down	HAND2-AS1	lincRNA	down	0.864855	1	0.864855	hsa-miR-29c-3p	up	HAND2-AS1	down
hsa-miR-200a-3p	up	SVIL	down	SVIL	protein_coding	down	MBNL1-AS1	lincRNA	down	0.891901	1	0.891901	hsa-miR-200a-3p	up	MBNL1-AS1	down
hsa-miR-200a-3p	up	SVIL	down	SVIL	protein_coding	down	HAND2-AS1	lincRNA	down	0.864855	1	0.864855	hsa-miR-200a-3p	up	HAND2-AS1	down
hsa-miR-200a-3p	up	SVIL	down	SVIL	protein_coding	down	AL513217.1	lincRNA	down	0.87365	1	0.87365	hsa-miR-200a-3p	up	AL513217.1	down
hsa-miR-200a-3p	up	SVIL	down	SVIL	protein_coding	down	AC002398.2	lincRNA	down	0.873532	1	0.873532	hsa-miR-200a-3p	up	AC002398.2	down
hsa-miR-34a-5p	up	SVOP	down	SVOP	protein_coding	down	MIR7-3HG	lincRNA	down	0.882292	1	0.882292	hsa-miR-34a-5p	up	MIR7-3HG	down
hsa-miR-26a-5p	up	SYNPO2	down	SYNPO2	protein_coding	down	MBNL1-AS1	lincRNA	down	0.969931	1	0.969931	hsa-miR-26a-5p	up	MBNL1-AS1	down
hsa-miR-26a-5p	up	SYNPO2	down	SYNPO2	protein_coding	down	HAND2-AS1	lincRNA	down	0.857562	1	0.857562	hsa-miR-26a-5p	up	HAND2-AS1	down
hsa-miR-26a-5p	up	SYNPO2	down	SYNPO2	protein_coding	down	AL513217.1	lincRNA	down	0.8739	1	0.8739	hsa-miR-26a-5p	up	AL513217.1	down
hsa-miR-26b-5p	up	SYNPO2	down	SYNPO2	protein_coding	down	MBNL1-AS1	lincRNA	down	0.969931	1	0.969931	hsa-miR-26b-5p	up	MBNL1-AS1	down
hsa-miR-26b-5p	up	SYNPO2	down	SYNPO2	protein_coding	down	HAND2-AS1	lincRNA	down	0.857562	1	0.857562	hsa-miR-26b-5p	up	HAND2-AS1	down
hsa-miR-26b-5p	up	SYNPO2	down	SYNPO2	protein_coding	down	AL513217.1	lincRNA	down	0.8739	1	0.8739	hsa-miR-26b-5p	up	AL513217.1	down
hsa-miR-141-3p	up	SYNPO2	down	SYNPO2	protein_coding	down	MBNL1-AS1	lincRNA	down	0.969931	1	0.969931	hsa-miR-141-3p	up	MBNL1-AS1	down
hsa-miR-141-3p	up	SYNPO2	down	SYNPO2	protein_coding	down	HAND2-AS1	lincRNA	down	0.857562	1	0.857562	hsa-miR-141-3p	up	HAND2-AS1	down
hsa-miR-141-3p	up	SYNPO2	down	SYNPO2	protein_coding	down	AL513217.1	lincRNA	down	0.8739	1	0.8739	hsa-miR-141-3p	up	AL513217.1	down
hsa-miR-141-3p	up	SYNPO2	down	SYNPO2	protein_coding	down	AC010776.2	lincRNA	down	0.859736	1	0.859736	hsa-miR-141-3p	up	AC010776.2	down
hsa-miR-141-3p	up	SYNPO2	down	SYNPO2	protein_coding	down	AC002398.2	lincRNA	down	0.885107	1	0.885107	hsa-miR-141-3p	up	AC002398.2	down
hsa-miR-200a-3p	up	SYNPO2	down	SYNPO2	protein_coding	down	MBNL1-AS1	lincRNA	down	0.969931	1	0.969931	hsa-miR-200a-3p	up	MBNL1-AS1	down
hsa-miR-200a-3p	up	SYNPO2	down	SYNPO2	protein_coding	down	HAND2-AS1	lincRNA	down	0.857562	1	0.857562	hsa-miR-200a-3p	up	HAND2-AS1	down
hsa-miR-200a-3p	up	SYNPO2	down	SYNPO2	protein_coding	down	AL513217.1	lincRNA	down	0.8739	1	0.8739	hsa-miR-200a-3p	up	AL513217.1	down
hsa-miR-200a-3p	up	SYNPO2	down	SYNPO2	protein_coding	down	AC010776.2	lincRNA	down	0.859736	1	0.859736	hsa-miR-200a-3p	up	AC010776.2	down
hsa-miR-200a-3p	up	SYNPO2	down	SYNPO2	protein_coding	down	AC002398.2	lincRNA	down	0.885107	1	0.885107	hsa-miR-200a-3p	up	AC002398.2	down
hsa-miR-34a-5p	up	SYT9	down	SYT9	protein_coding	down	MIR137HG	lincRNA	down	0.852738	1	0.852738	hsa-miR-34a-5p	up	MIR137HG	down
hsa-miR-22-3p	up	TACR3	down	TACR3	protein_coding	down	TRDN-AS1	lincRNA	down	0.851066	1	0.851066	hsa-miR-22-3p	up	TRDN-AS1	down
hsa-miR-22-3p	up	TACR3	down	TACR3	protein_coding	down	AL110292.1	lincRNA	down	0.917496	1	0.917496	hsa-miR-22-3p	up	AL110292.1	down
hsa-miR-22-3p	up	TAGLN	down	TAGLN	protein_coding	down	MBNL1-AS1	lincRNA	down	0.871663	1	0.871663	hsa-miR-22-3p	up	MBNL1-AS1	down
hsa-miR-22-3p	up	TAGLN	down	TAGLN	protein_coding	down	AL513217.1	lincRNA	down	0.882341	1	0.882341	hsa-miR-22-3p	up	AL513217.1	down
hsa-miR-27a-3p	up	TFAP2B	down	TFAP2B	protein_coding	down	MIR7-3HG	lincRNA	down	0.966103	1	0.966103	hsa-miR-27a-3p	up	MIR7-3HG	down
hsa-miR-28-5p	up	TMEM200B	down	TMEM200B	protein_coding	down	ZNF667-AS1	lincRNA	down	0.871547	1	0.871547	hsa-miR-28-5p	up	ZNF667-AS1	down
hsa-miR-34a-5p	up	TMEM200B	down	TMEM200B	protein_coding	down	ZNF667-AS1	lincRNA	down	0.871547	1	0.871547	hsa-miR-34a-5p	up	ZNF667-AS1	down
hsa-miR-142-3p	up	TMEM200B	down	TMEM200B	protein_coding	down	ZNF667-AS1	lincRNA	down	0.871547	1	0.871547	hsa-miR-142-3p	up	ZNF667-AS1	down
hsa-miR-335-3p	up	TMEM200B	down	TMEM200B	protein_coding	down	ZNF667-AS1	lincRNA	down	0.871547	1	0.871547	hsa-miR-335-3p	up	ZNF667-AS1	down
hsa-miR-29b-3p	up	TMEM236	down	TMEM236	protein_coding	down	AC016027.1	lincRNA	down	0.883549	1	0.883549	hsa-miR-29b-3p	up	AC016027.1	down
hsa-miR-29b-3p	up	TMEM236	down	TMEM236	protein_coding	down	AC087379.1	lincRNA	down	0.863539	1	0.863539	hsa-miR-29b-3p	up	AC087379.1	down
hsa-miR-29c-3p	up	TMEM236	down	TMEM236	protein_coding	down	AC016027.1	lincRNA	down	0.883549	1	0.883549	hsa-miR-29c-3p	up	AC016027.1	down
hsa-miR-29c-3p	up	TMEM236	down	TMEM236	protein_coding	down	AC087379.1	lincRNA	down	0.863539	1	0.863539	hsa-miR-29c-3p	up	AC087379.1	down
hsa-miR-10a-5p	up	TMOD1	down	TMOD1	protein_coding	down	HAND2-AS1	lincRNA	down	0.85554	1	0.85554	hsa-miR-10a-5p	up	HAND2-AS1	down
hsa-miR-10b-5p	up	TMOD1	down	TMOD1	protein_coding	down	HAND2-AS1	lincRNA	down	0.85554	1	0.85554	hsa-miR-10b-5p	up	HAND2-AS1	down
hsa-miR-130a-3p	up	TMOD1	down	TMOD1	protein_coding	down	HAND2-AS1	lincRNA	down	0.85554	1	0.85554	hsa-miR-130a-3p	up	HAND2-AS1	down
hsa-miR-582-3p	up	TMOD1	down	TMOD1	protein_coding	down	HAND2-AS1	lincRNA	down	0.85554	1	0.85554	hsa-miR-582-3p	up	HAND2-AS1	down
hsa-miR-744-3p	up	TMOD1	down	TMOD1	protein_coding	down	HAND2-AS1	lincRNA	down	0.85554	1	0.85554	hsa-miR-744-3p	up	HAND2-AS1	down
hsa-miR-17-5p	up	TNS1	down	TNS1	protein_coding	down	MBNL1-AS1	lincRNA	down	0.919132	1	0.919132	hsa-miR-17-5p	up	MBNL1-AS1	down
hsa-miR-17-5p	up	TNS1	down	TNS1	protein_coding	down	AL356489.2	lincRNA	down	0.87088	1	0.87088	hsa-miR-17-5p	up	AL356489.2	down
hsa-miR-20a-5p	up	TNS1	down	TNS1	protein_coding	down	MBNL1-AS1	lincRNA	down	0.919132	1	0.919132	hsa-miR-20a-5p	up	MBNL1-AS1	down
hsa-miR-20a-5p	up	TNS1	down	TNS1	protein_coding	down	AC009102.2	lincRNA	down	0.903466	1	0.903466	hsa-miR-20a-5p	up	AC009102.2	down
hsa-miR-20a-5p	up	TNS1	down	TNS1	protein_coding	down	AL356489.2	lincRNA	down	0.87088	1	0.87088	hsa-miR-20a-5p	up	AL356489.2	down
hsa-miR-106a-5p	up	TNS1	down	TNS1	protein_coding	down	MBNL1-AS1	lincRNA	down	0.919132	1	0.919132	hsa-miR-106a-5p	up	MBNL1-AS1	down
hsa-miR-106a-5p	up	TNS1	down	TNS1	protein_coding	down	AL356489.2	lincRNA	down	0.87088	1	0.87088	hsa-miR-106a-5p	up	AL356489.2	down
hsa-miR-182-5p	up	TNS1	down	TNS1	protein_coding	down	AL356489.2	lincRNA	down	0.87088	1	0.87088	hsa-miR-182-5p	up	AL356489.2	down
hsa-miR-9-5p	up	TNS1	down	TNS1	protein_coding	down	MBNL1-AS1	lincRNA	down	0.919132	1	0.919132	hsa-miR-9-5p	up	MBNL1-AS1	down
hsa-miR-9-5p	up	TNS1	down	TNS1	protein_coding	down	AL513217.1	lincRNA	down	0.880854	1	0.880854	hsa-miR-9-5p	up	AL513217.1	down
hsa-miR-9-5p	up	TNS1	down	TNS1	protein_coding	down	AC009102.2	lincRNA	down	0.903466	1	0.903466	hsa-miR-9-5p	up	AC009102.2	down
hsa-miR-106b-5p	up	TNS1	down	TNS1	protein_coding	down	MBNL1-AS1	lincRNA	down	0.919132	1	0.919132	hsa-miR-106b-5p	up	MBNL1-AS1	down
hsa-miR-106b-5p	up	TNS1	down	TNS1	protein_coding	down	AC009102.2	lincRNA	down	0.903466	1	0.903466	hsa-miR-106b-5p	up	AC009102.2	down
hsa-miR-106b-5p	up	TNS1	down	TNS1	protein_coding	down	AL356489.2	lincRNA	down	0.87088	1	0.87088	hsa-miR-106b-5p	up	AL356489.2	down
hsa-miR-24-3p	up	TNS1	down	TNS1	protein_coding	down	AC036108.3	lincRNA	down	0.869516	1	0.869516	hsa-miR-24-3p	up	AC036108.3	down
hsa-miR-24-3p	up	TNS1	down	TNS1	protein_coding	down	AL513217.1	lincRNA	down	0.880854	1	0.880854	hsa-miR-24-3p	up	AL513217.1	down
hsa-miR-24-3p	up	TNS1	down	TNS1	protein_coding	down	AC009102.2	lincRNA	down	0.903466	1	0.903466	hsa-miR-24-3p	up	AC009102.2	down
hsa-miR-24-3p	up	TNS1	down	TNS1	protein_coding	down	AL356489.2	lincRNA	down	0.87088	1	0.87088	hsa-miR-24-3p	up	AL356489.2	down
hsa-let-7g-3p	up	TNS1	down	TNS1	protein_coding	down	AC009102.2	lincRNA	down	0.903466	1	0.903466	hsa-let-7g-3p	up	AC009102.2	down
hsa-let-7g-3p	up	TNS1	down	TNS1	protein_coding	down	AC002398.2	lincRNA	down	0.906634	1	0.906634	hsa-let-7g-3p	up	AC002398.2	down
hsa-miR-141-3p	up	TNS1	down	TNS1	protein_coding	down	MBNL1-AS1	lincRNA	down	0.919132	1	0.919132	hsa-miR-141-3p	up	MBNL1-AS1	down
hsa-miR-141-3p	up	TNS1	down	TNS1	protein_coding	down	AL513217.1	lincRNA	down	0.880854	1	0.880854	hsa-miR-141-3p	up	AL513217.1	down
hsa-miR-141-3p	up	TNS1	down	TNS1	protein_coding	down	AC002398.2	lincRNA	down	0.906634	1	0.906634	hsa-miR-141-3p	up	AC002398.2	down
hsa-miR-200a-3p	up	TNS1	down	TNS1	protein_coding	down	MBNL1-AS1	lincRNA	down	0.919132	1	0.919132	hsa-miR-200a-3p	up	MBNL1-AS1	down
hsa-miR-200a-3p	up	TNS1	down	TNS1	protein_coding	down	AL513217.1	lincRNA	down	0.880854	1	0.880854	hsa-miR-200a-3p	up	AL513217.1	down
hsa-miR-200a-3p	up	TNS1	down	TNS1	protein_coding	down	AC002398.2	lincRNA	down	0.906634	1	0.906634	hsa-miR-200a-3p	up	AC002398.2	down
hsa-miR-183-5p	up	TPM1	down	TPM1	protein_coding	down	MBNL1-AS1	lincRNA	down	0.857075	1	0.857075	hsa-miR-183-5p	up	MBNL1-AS1	down
hsa-miR-193a-5p	down	TRPC5	up	TRPC5	protein_coding	up	CASC15	lincRNA	up	0.857665	1	0.857665	hsa-miR-193a-5p	down	CASC15	up
hsa-miR-193a-5p	down	TRPC5	up	TRPC5	protein_coding	up	DIAPH2-AS1	lincRNA	up	0.857613	1	0.857613	hsa-miR-193a-5p	down	DIAPH2-AS1	up
hsa-miR-193a-5p	down	TRPC5	up	TRPC5	protein_coding	up	FTX	lincRNA	up	0.868833	1	0.868833	hsa-miR-193a-5p	down	FTX	up
hsa-miR-193a-5p	down	TRPC5	up	TRPC5	protein_coding	up	AL356124.1	lincRNA	up	0.903329	1	0.903329	hsa-miR-193a-5p	down	AL356124.1	up
hsa-miR-193a-5p	down	TRPC5	up	TRPC5	protein_coding	up	LINC02334	lincRNA	up	0.863114	1	0.863114	hsa-miR-193a-5p	down	LINC02334	up
hsa-miR-193a-5p	down	TRPC5	up	TRPC5	protein_coding	up	LNX1-AS1	lincRNA	up	0.85523	1	0.85523	hsa-miR-193a-5p	down	LNX1-AS1	up
hsa-miR-193a-5p	down	TRPC5	up	TRPC5	protein_coding	up	SLC8A1-AS1	lincRNA	up	0.8636	1	0.8636	hsa-miR-193a-5p	down	SLC8A1-AS1	up
hsa-miR-9-5p	up	UNC80	down	UNC80	protein_coding	down	AC022893.2	lincRNA	down	0.886955	1	0.886955	hsa-miR-9-5p	up	AC022893.2	down
hsa-miR-576-5p	up	UNC80	down	UNC80	protein_coding	down	AC022893.2	lincRNA	down	0.886955	1	0.886955	hsa-miR-576-5p	up	AC022893.2	down
hsa-miR-27a-3p	up	UNC80	down	UNC80	protein_coding	down	AC022893.2	lincRNA	down	0.886955	1	0.886955	hsa-miR-27a-3p	up	AC022893.2	down
hsa-miR-22-5p	up	ZDHHC15	down	ZDHHC15	protein_coding	down	ADAMTS9-AS2	lincRNA	down	0.861457	1	0.861457	hsa-miR-22-5p	up	ADAMTS9-AS2	down
hsa-miR-126-5p	up	ZDHHC15	down	ZDHHC15	protein_coding	down	ADAMTS9-AS2	lincRNA	down	0.861457	1	0.861457	hsa-miR-126-5p	up	ADAMTS9-AS2	down
hsa-miR-22-5p	up	ZDHHC22	down	ZDHHC22	protein_coding	down	MIR7-3HG	lincRNA	down	0.922856	1	0.922856	hsa-miR-22-5p	up	MIR7-3HG	down
hsa-miR-125b-5p	down	ZNF460	up	ZNF460	protein_coding	up	LINC00630	lincRNA	up	0.870889	1	0.870889	hsa-miR-125b-5p	down	LINC00630	up
hsa-miR-125a-5p	down	ZNF460	up	ZNF460	protein_coding	up	LINC00630	lincRNA	up	0.870889	1	0.870889	hsa-miR-125a-5p	down	LINC00630	up
